# Supplementary material for: Cholesterol inhibition enhances antitumor response of gilteritinib in lung cancer cells
Source: PubMed Central journal article supplement (PMC11443066; doi:10.1038/s41419-024-07082-x), 2024-09-30
Supplement: 41419_2024_7082_MOESM2_ESM.pdf [file 41419_2024_7082_MOESM2_ESM.pdf]

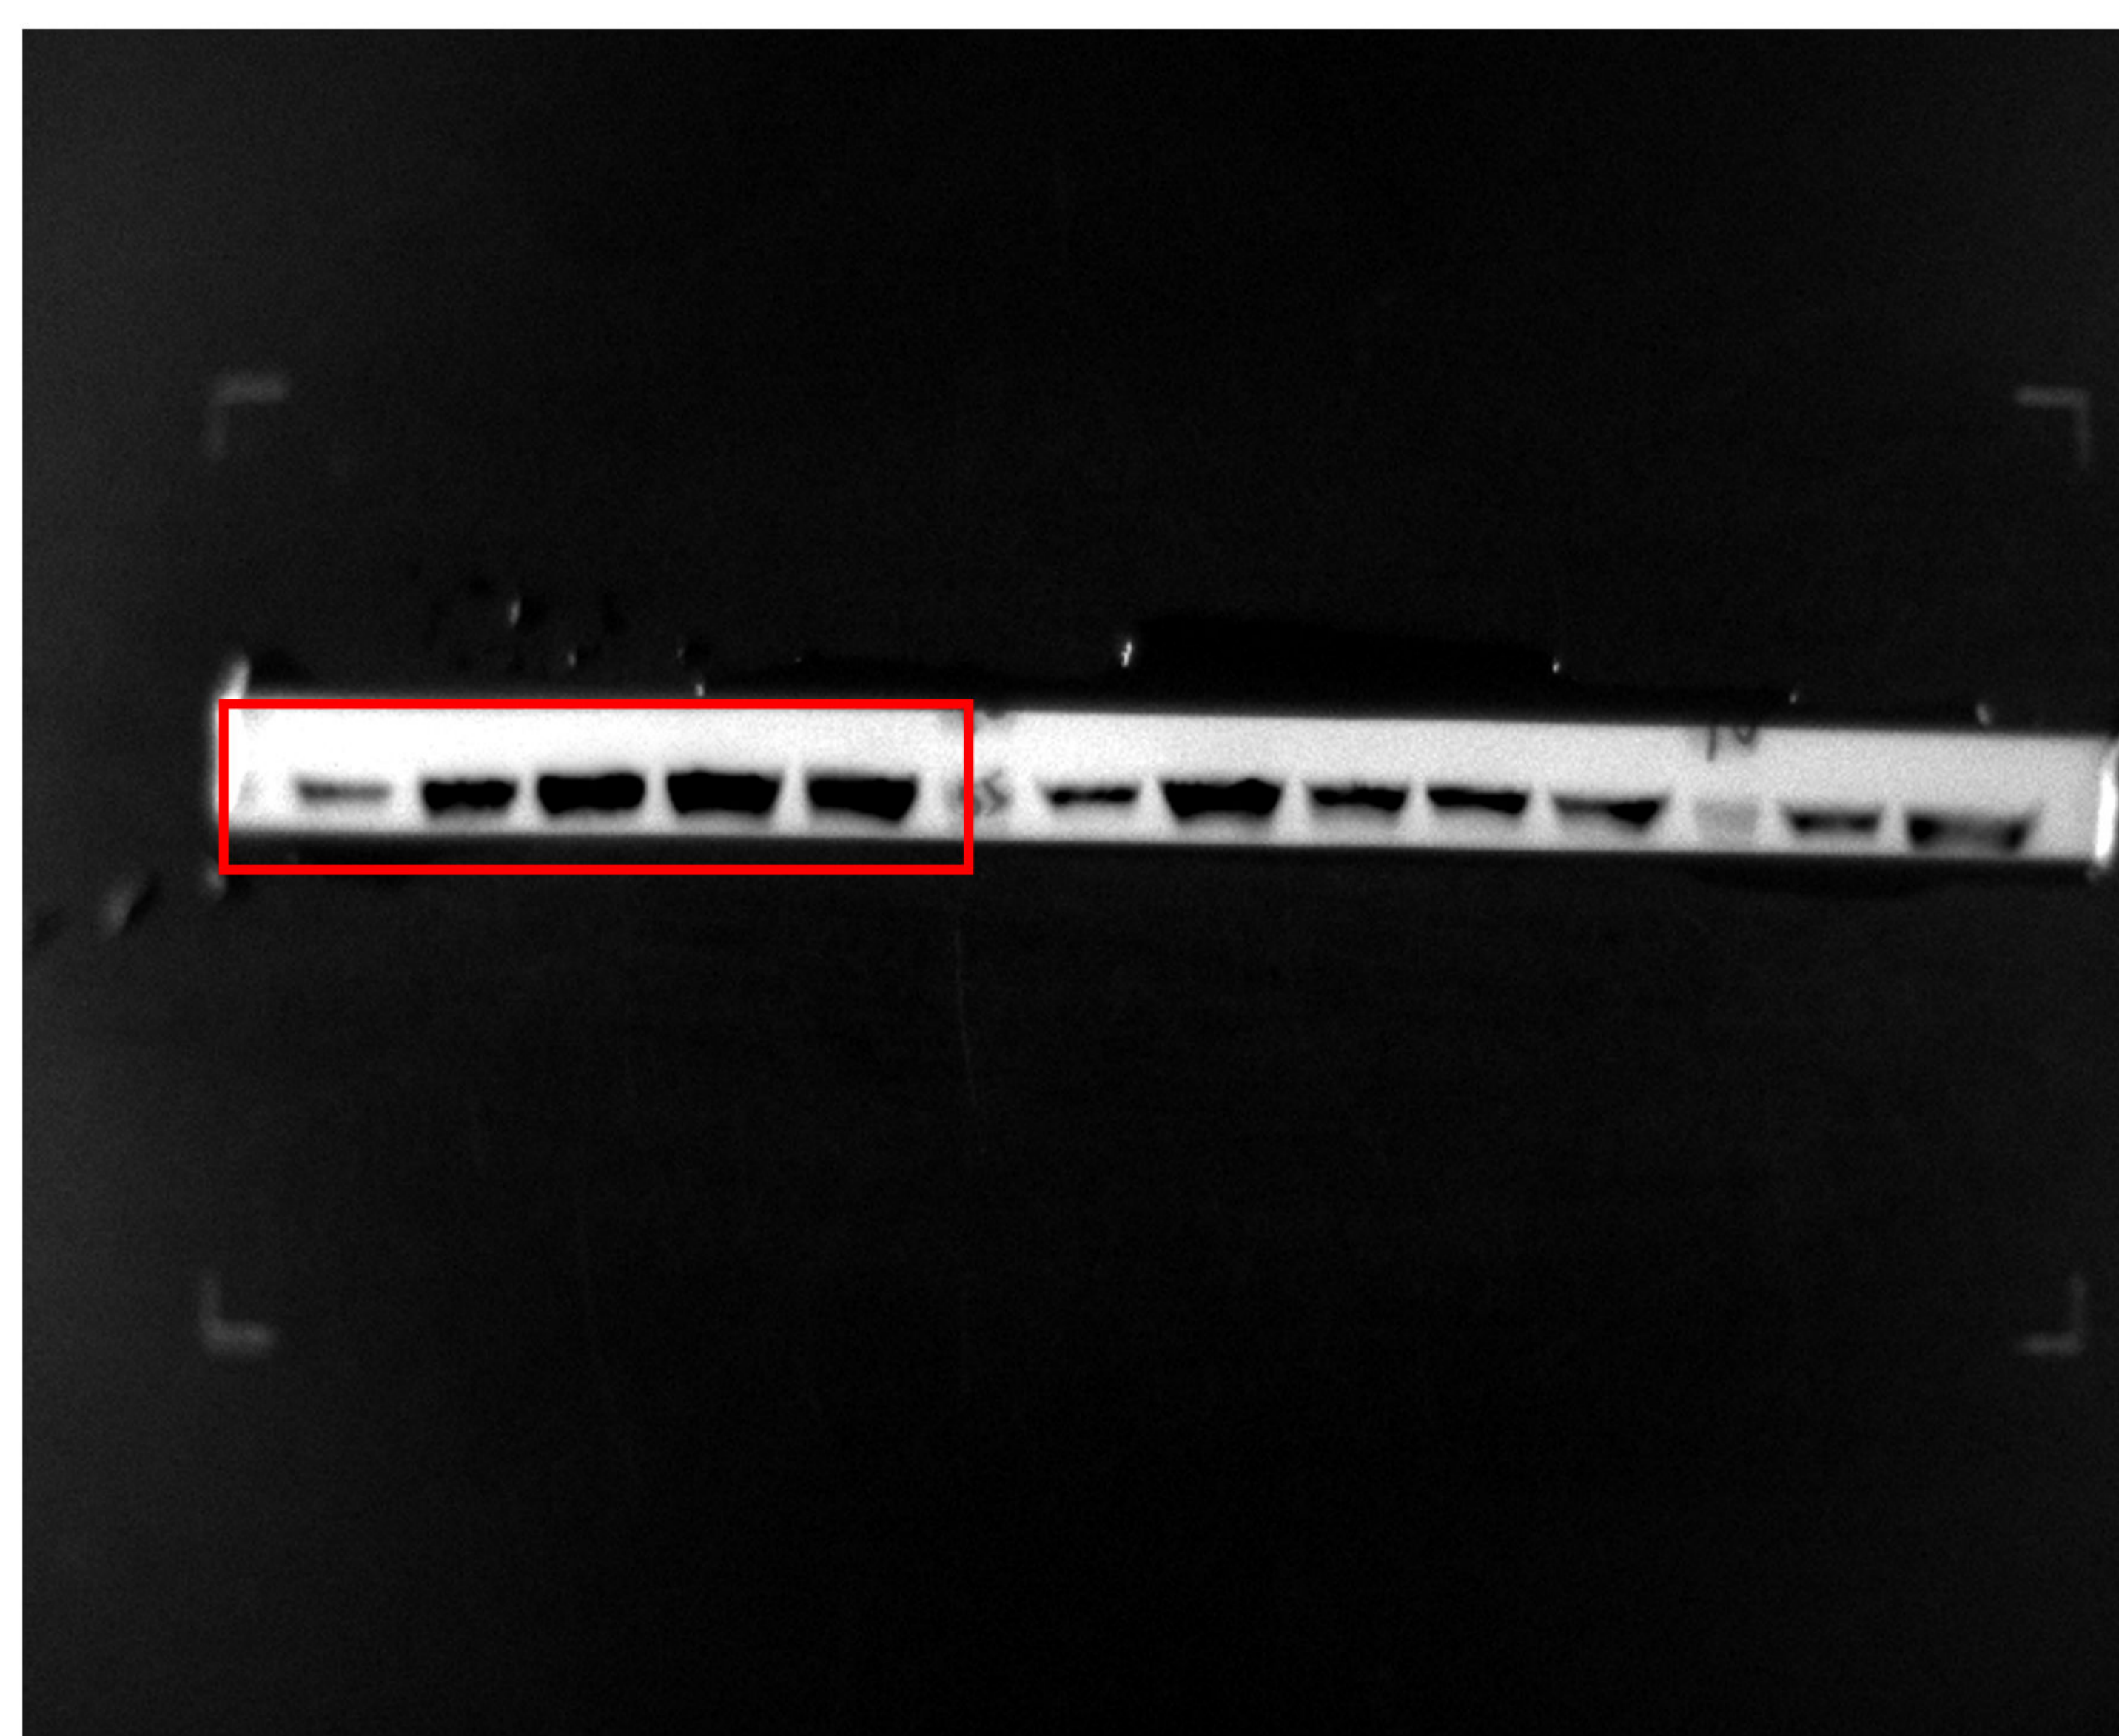

HMGCS1

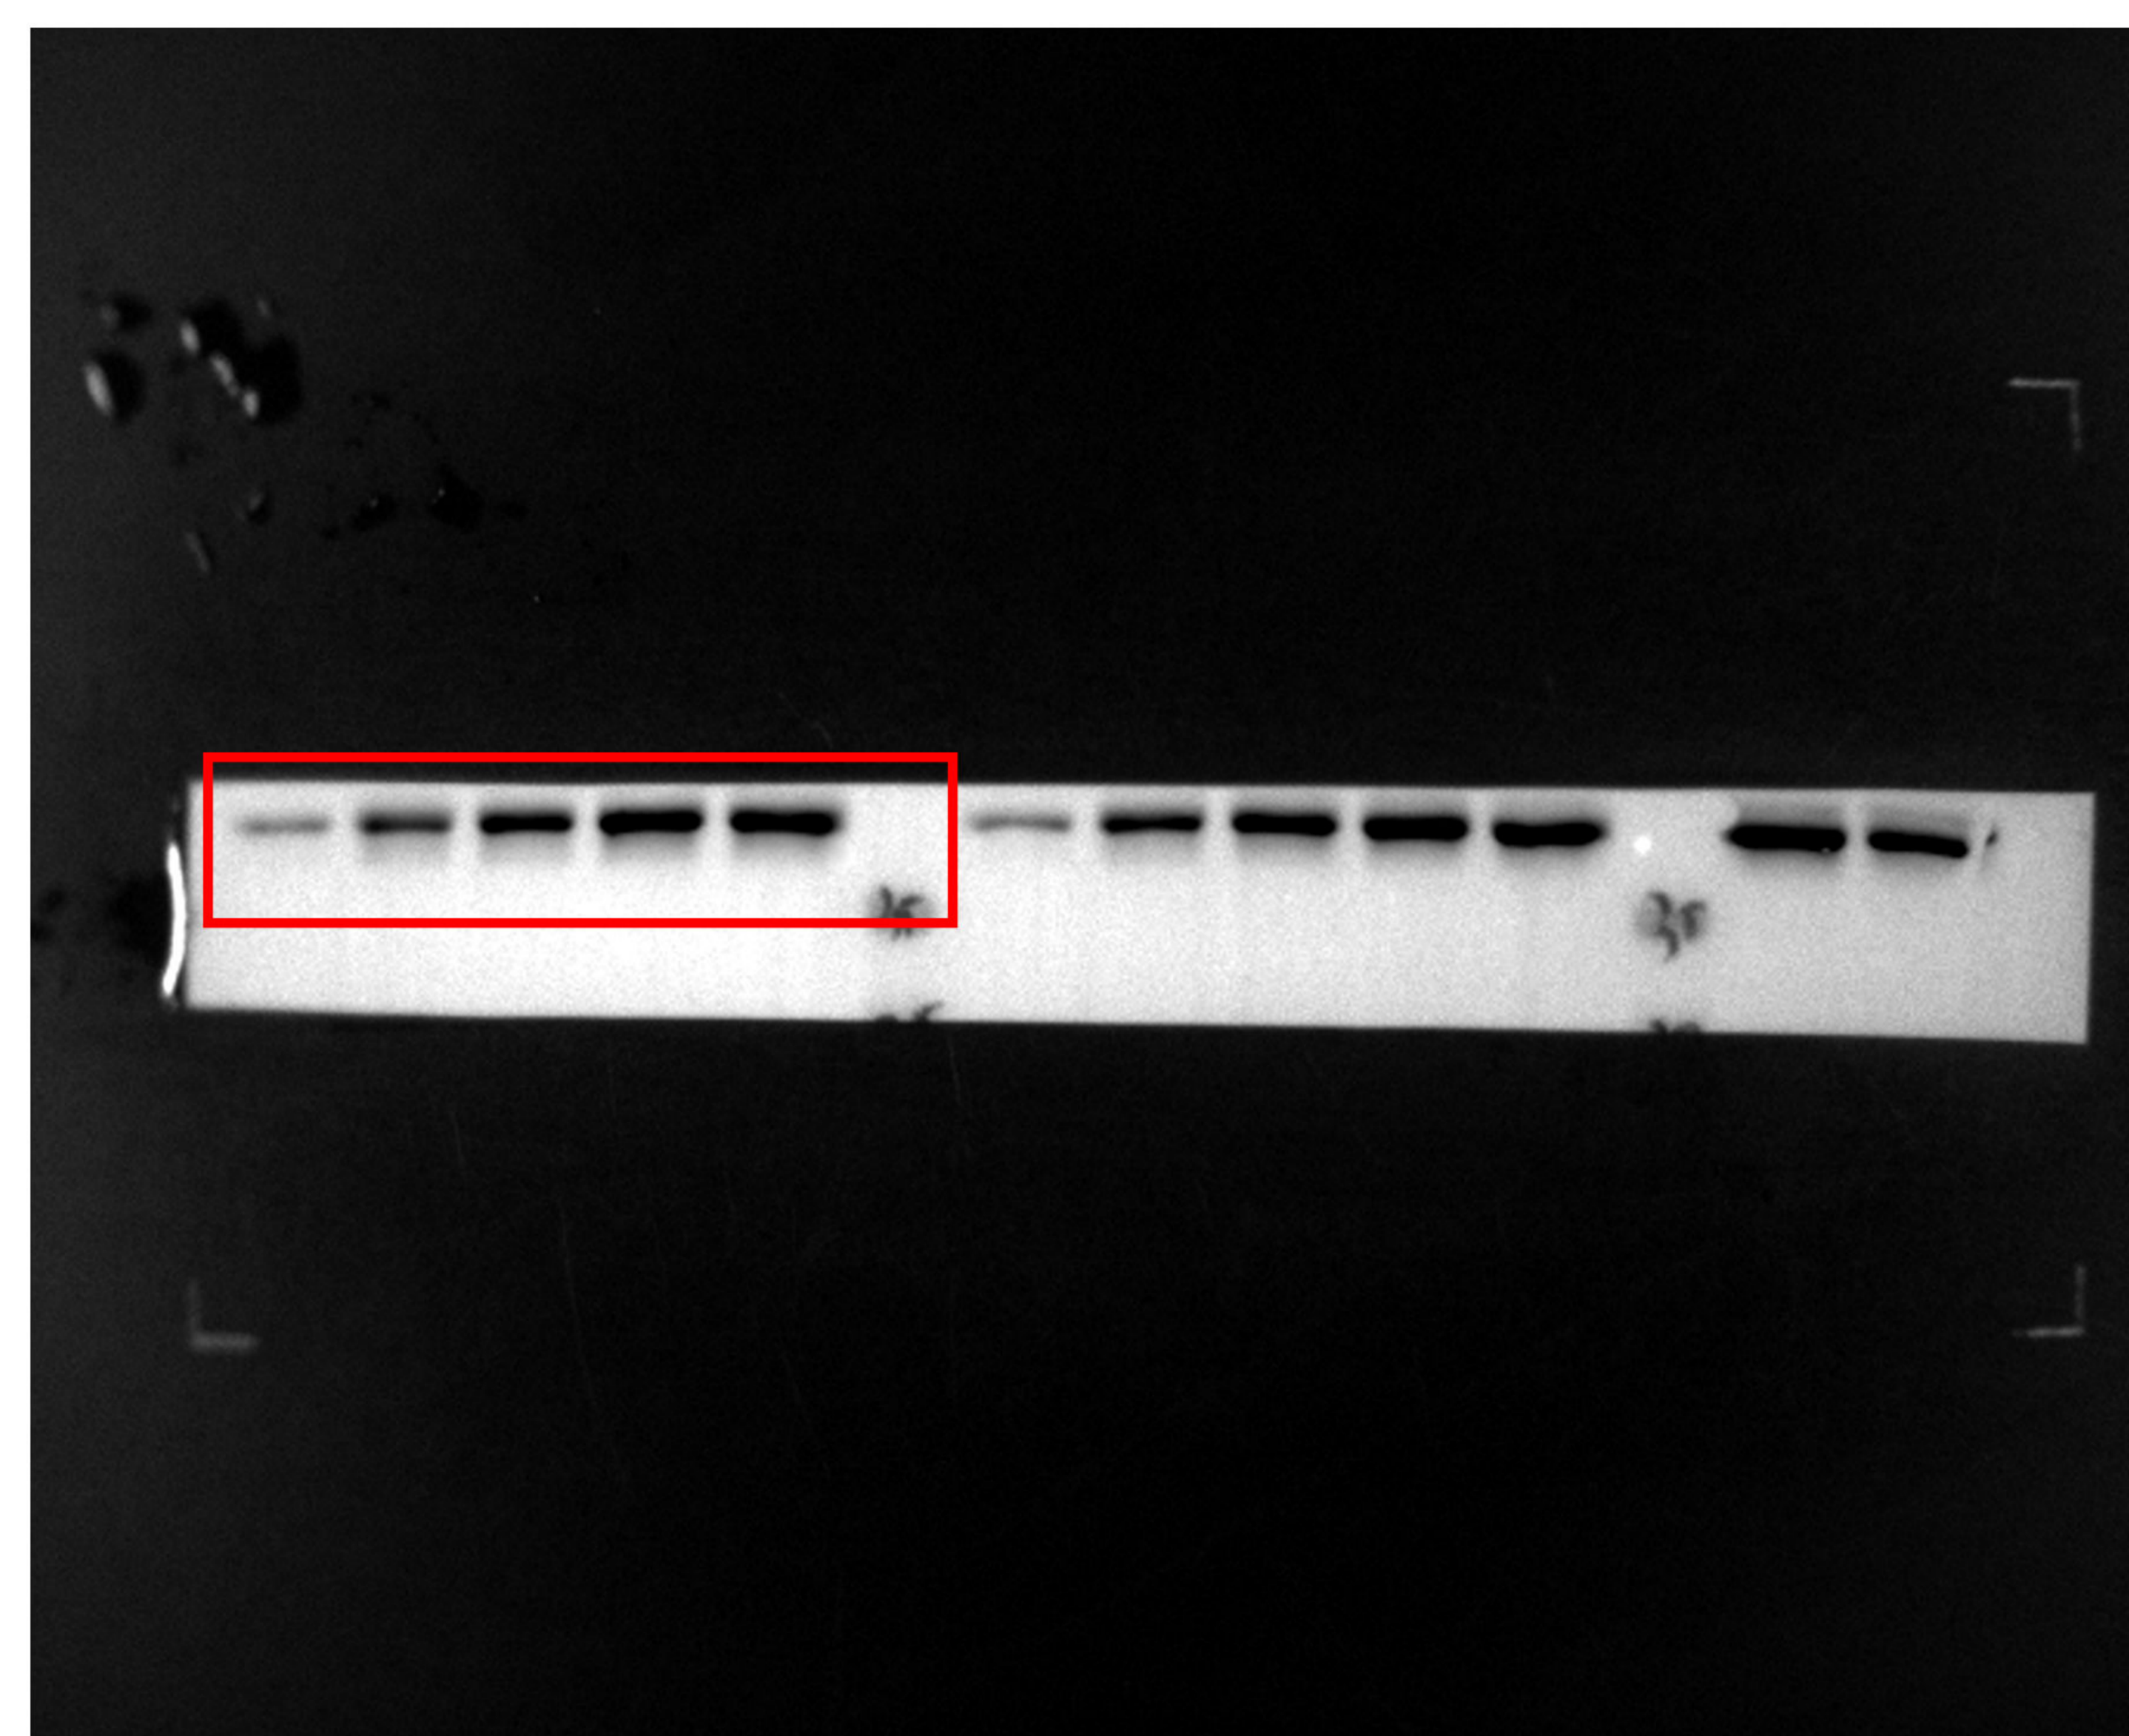

MVK

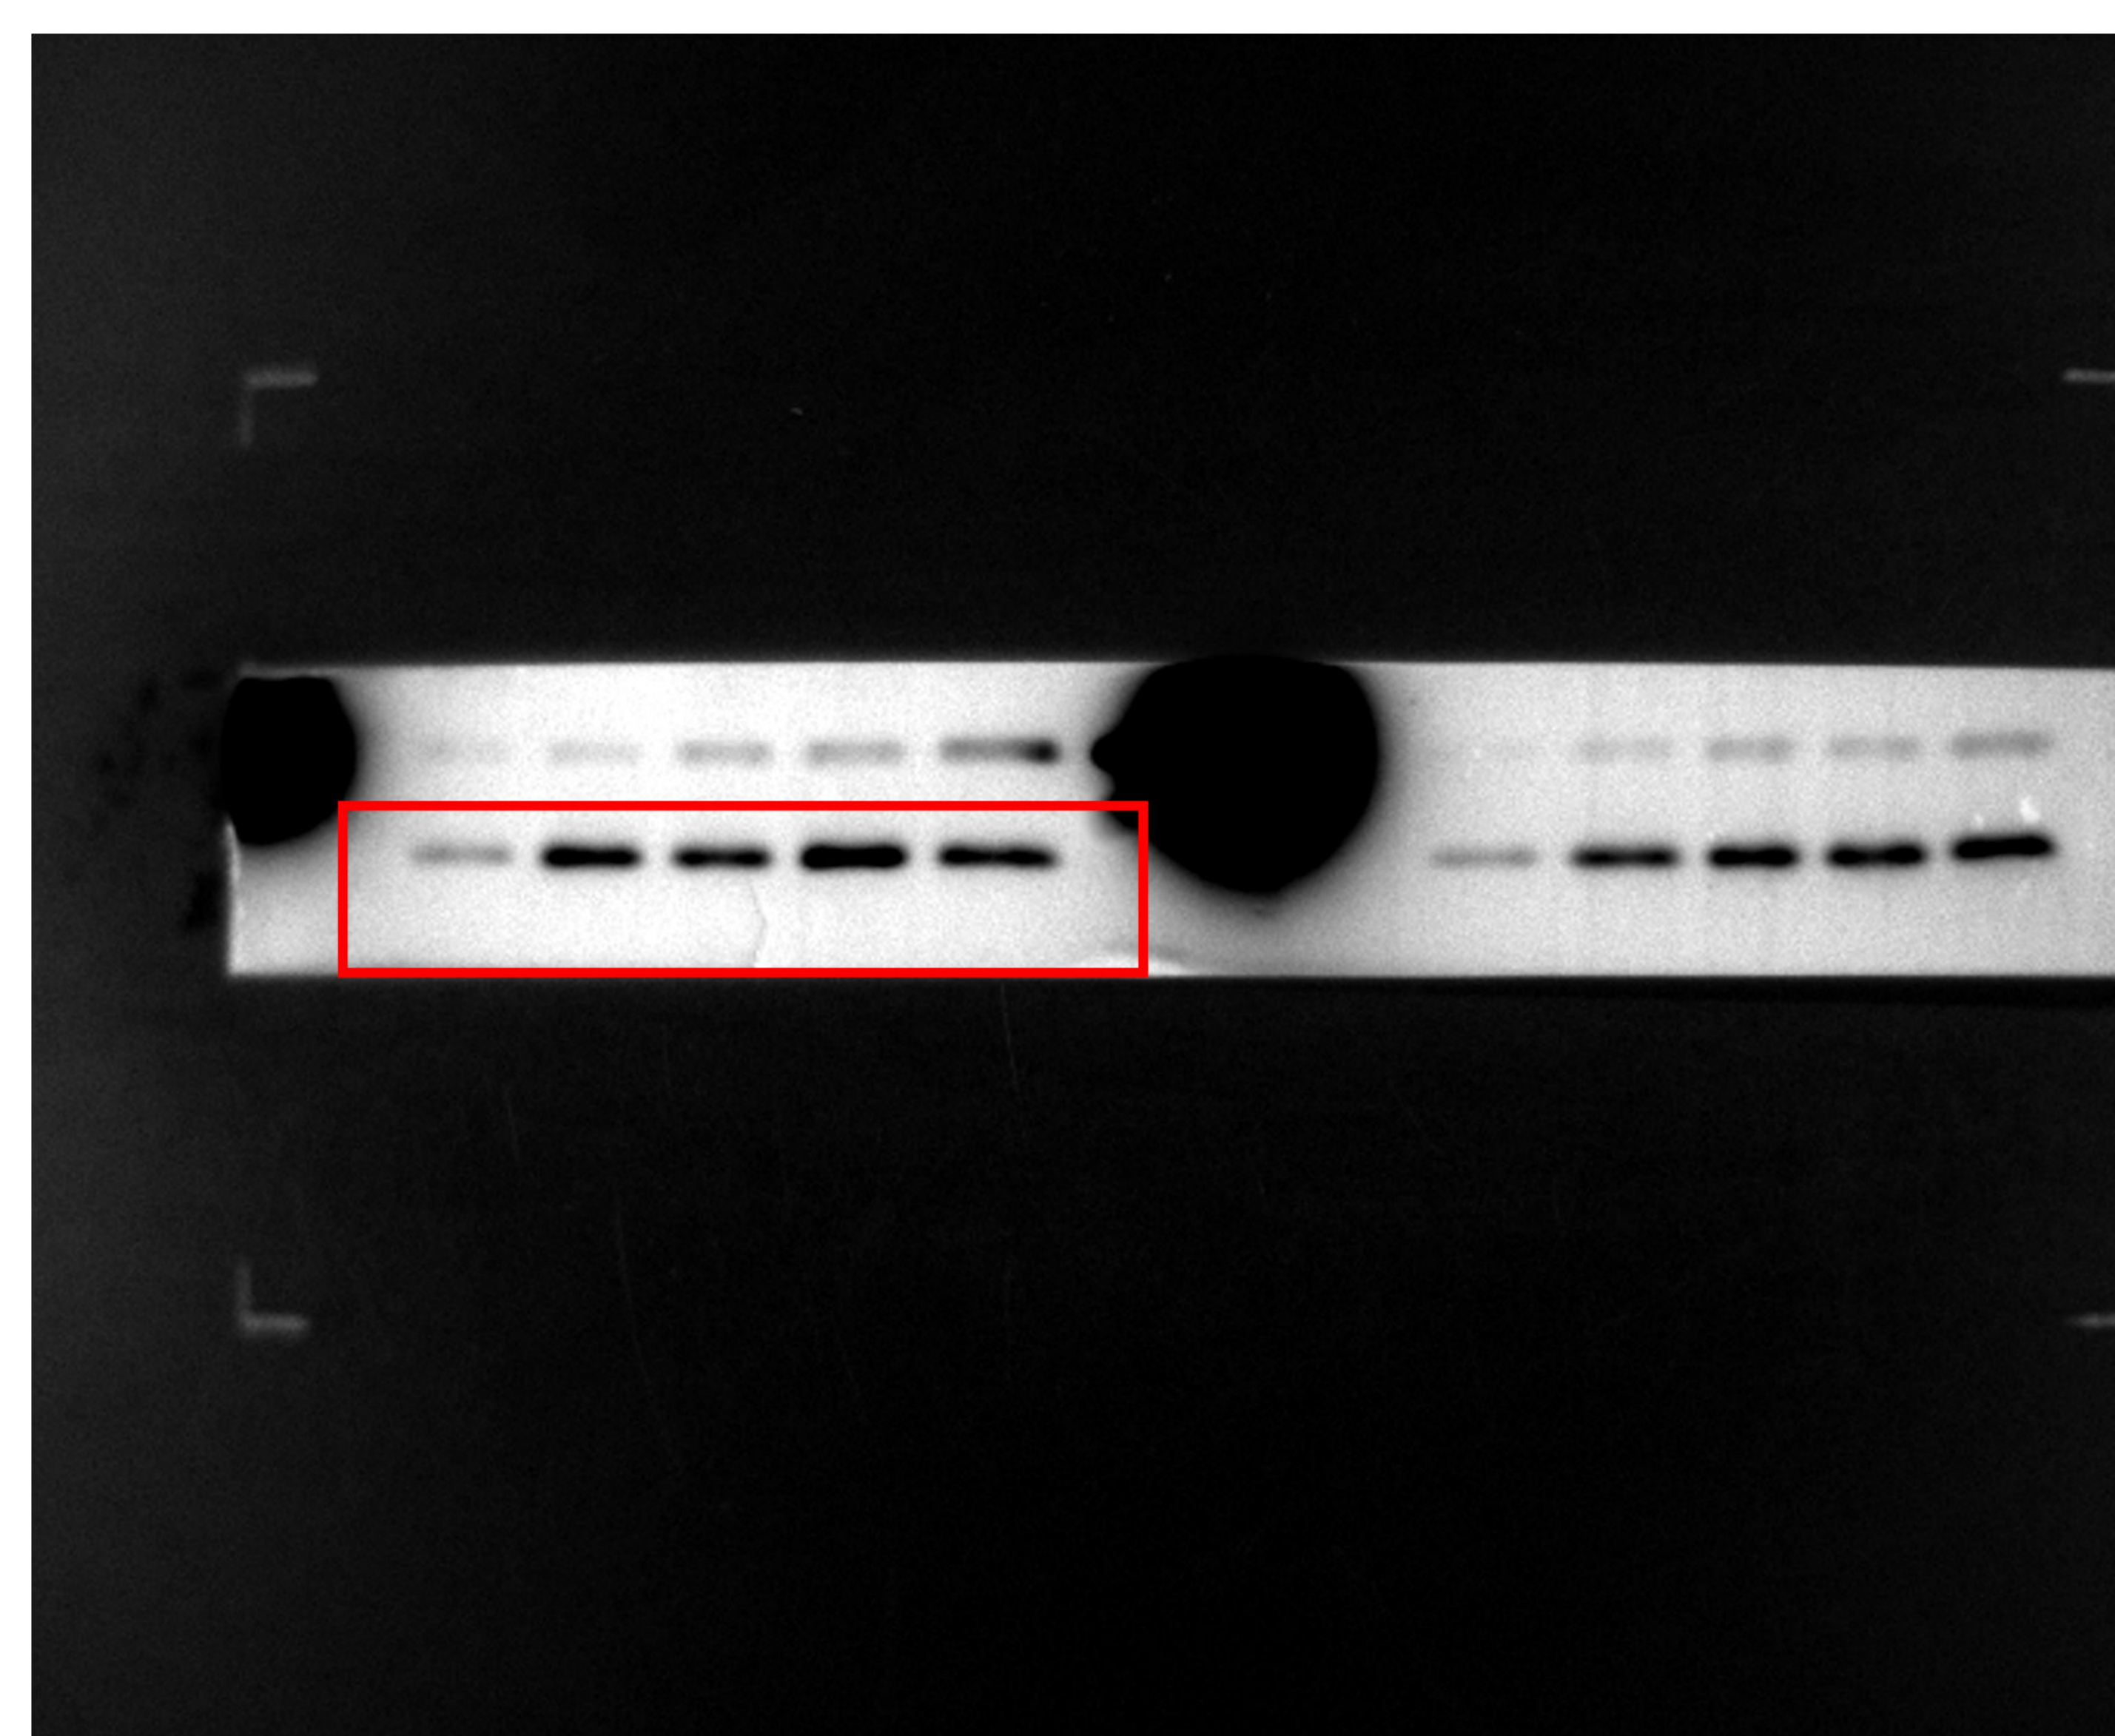

IDI1

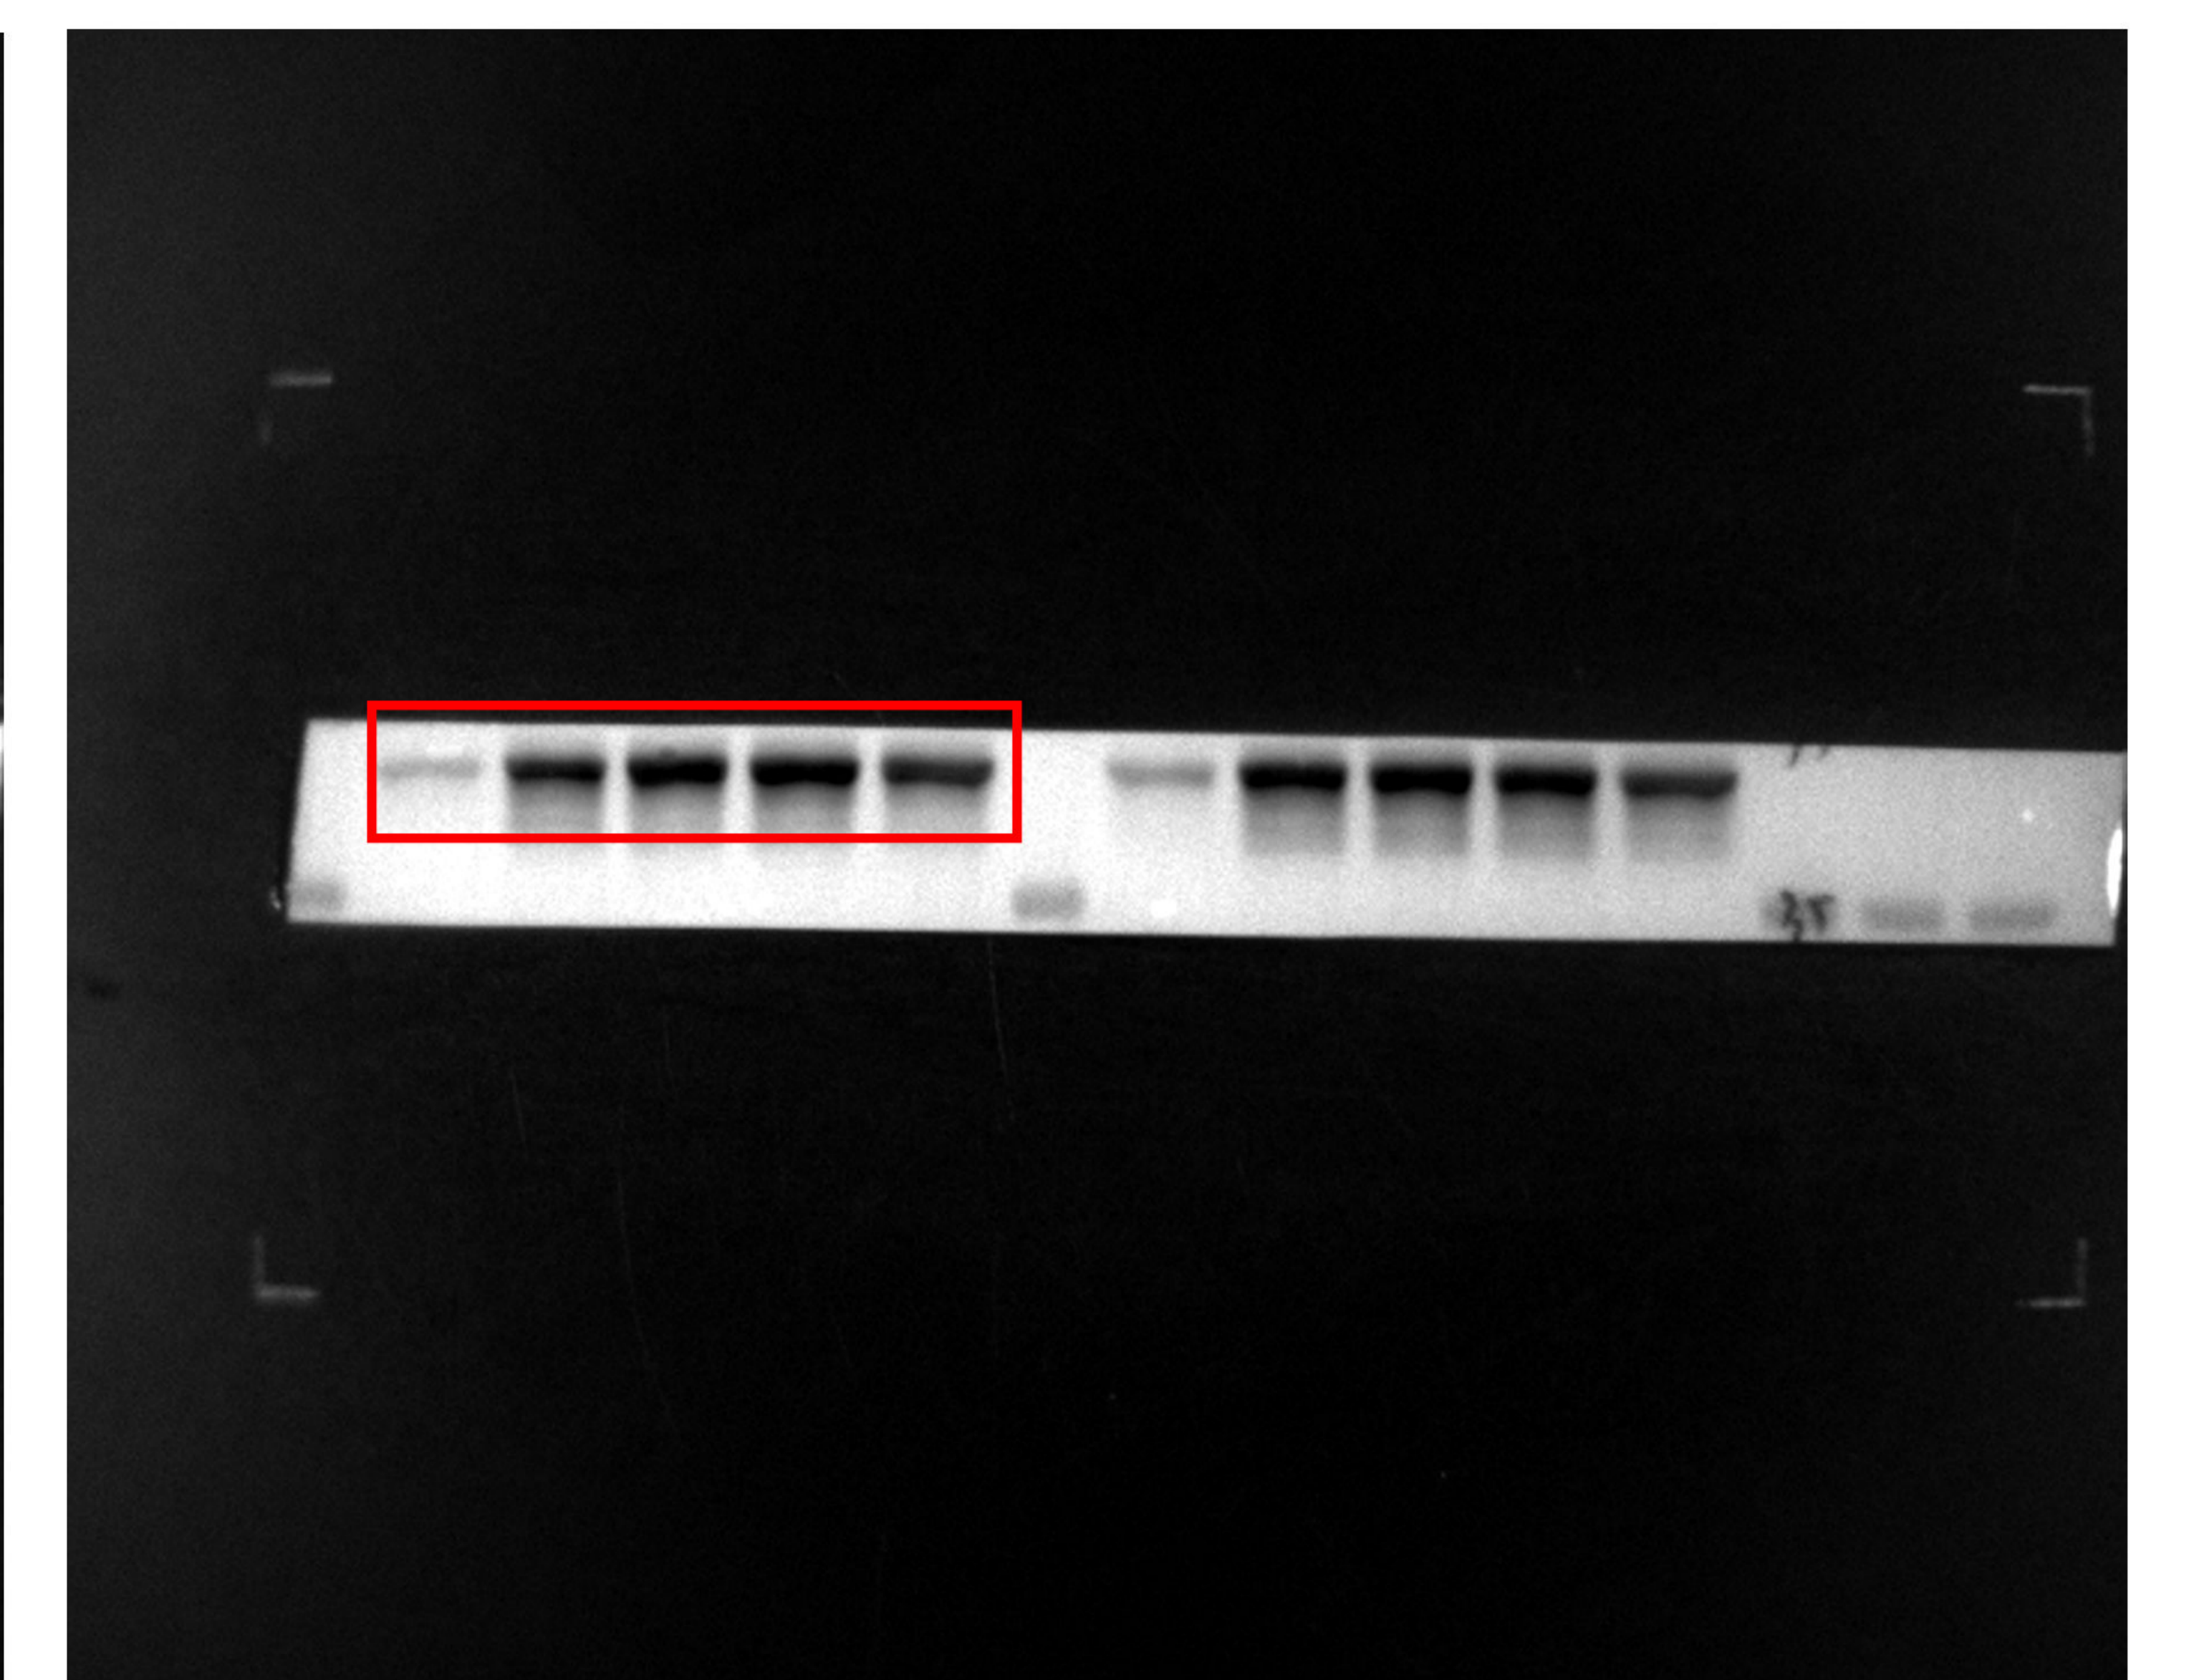

FDFT1

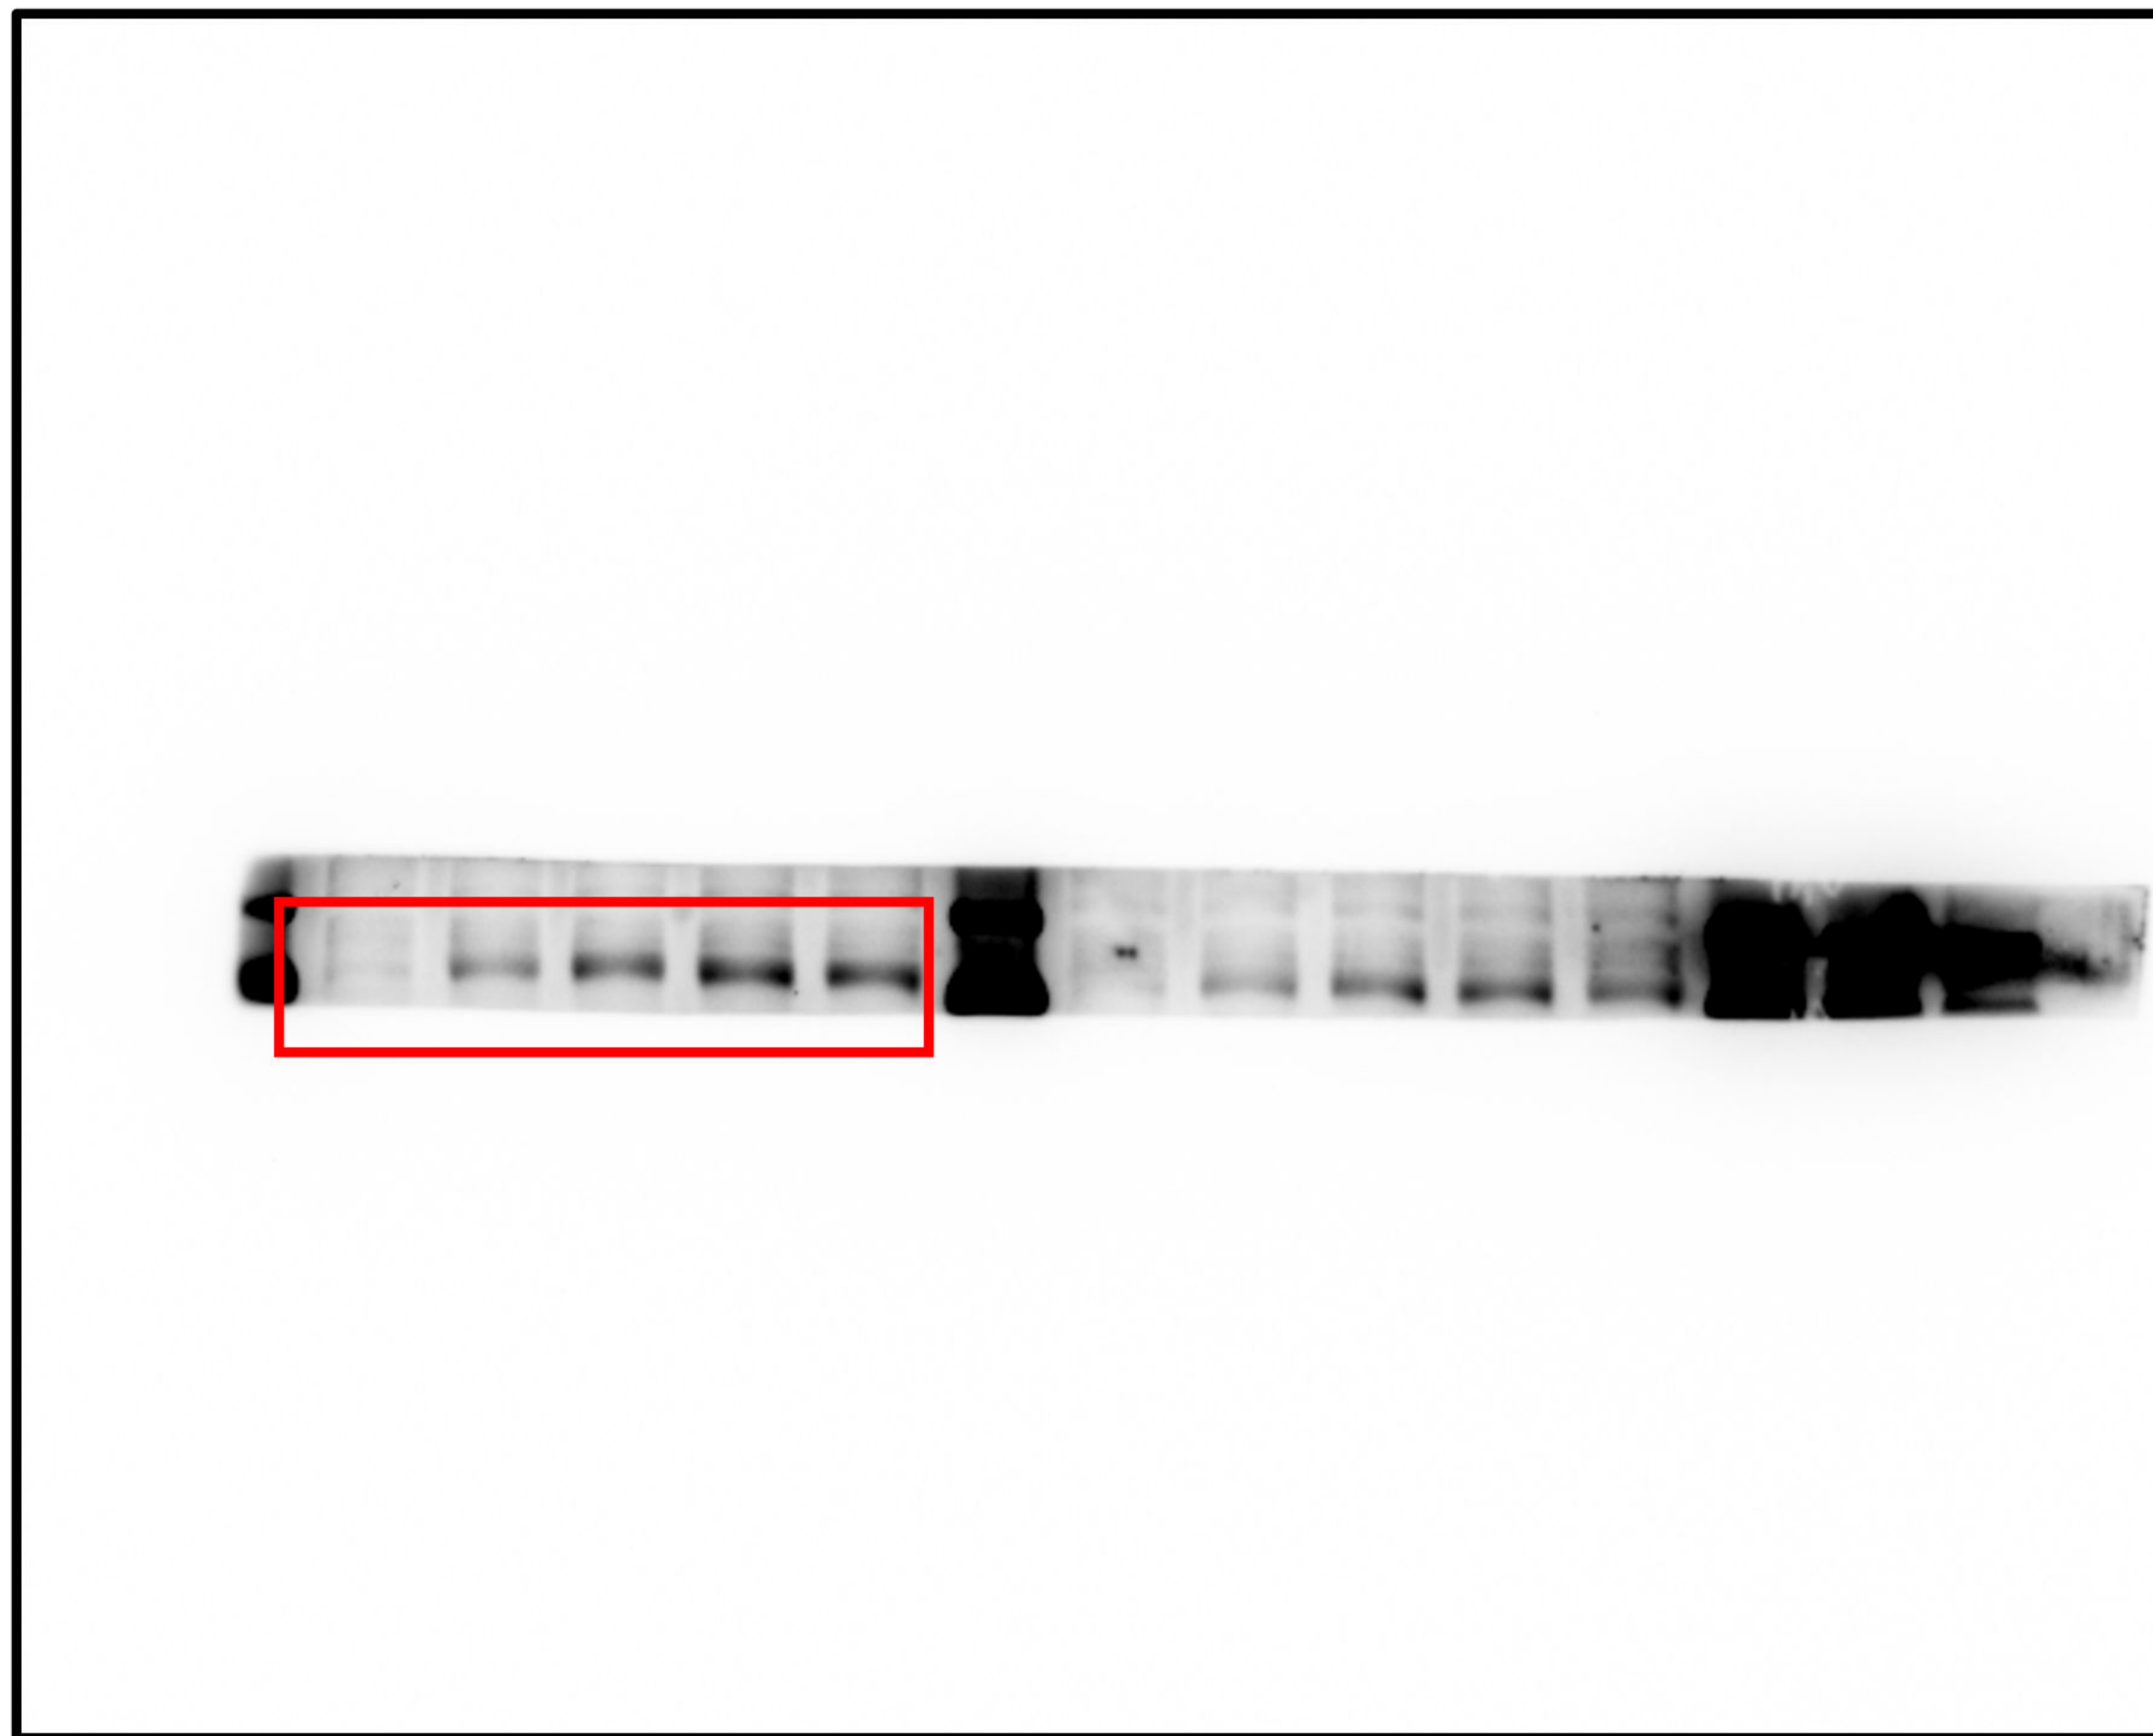

LSS

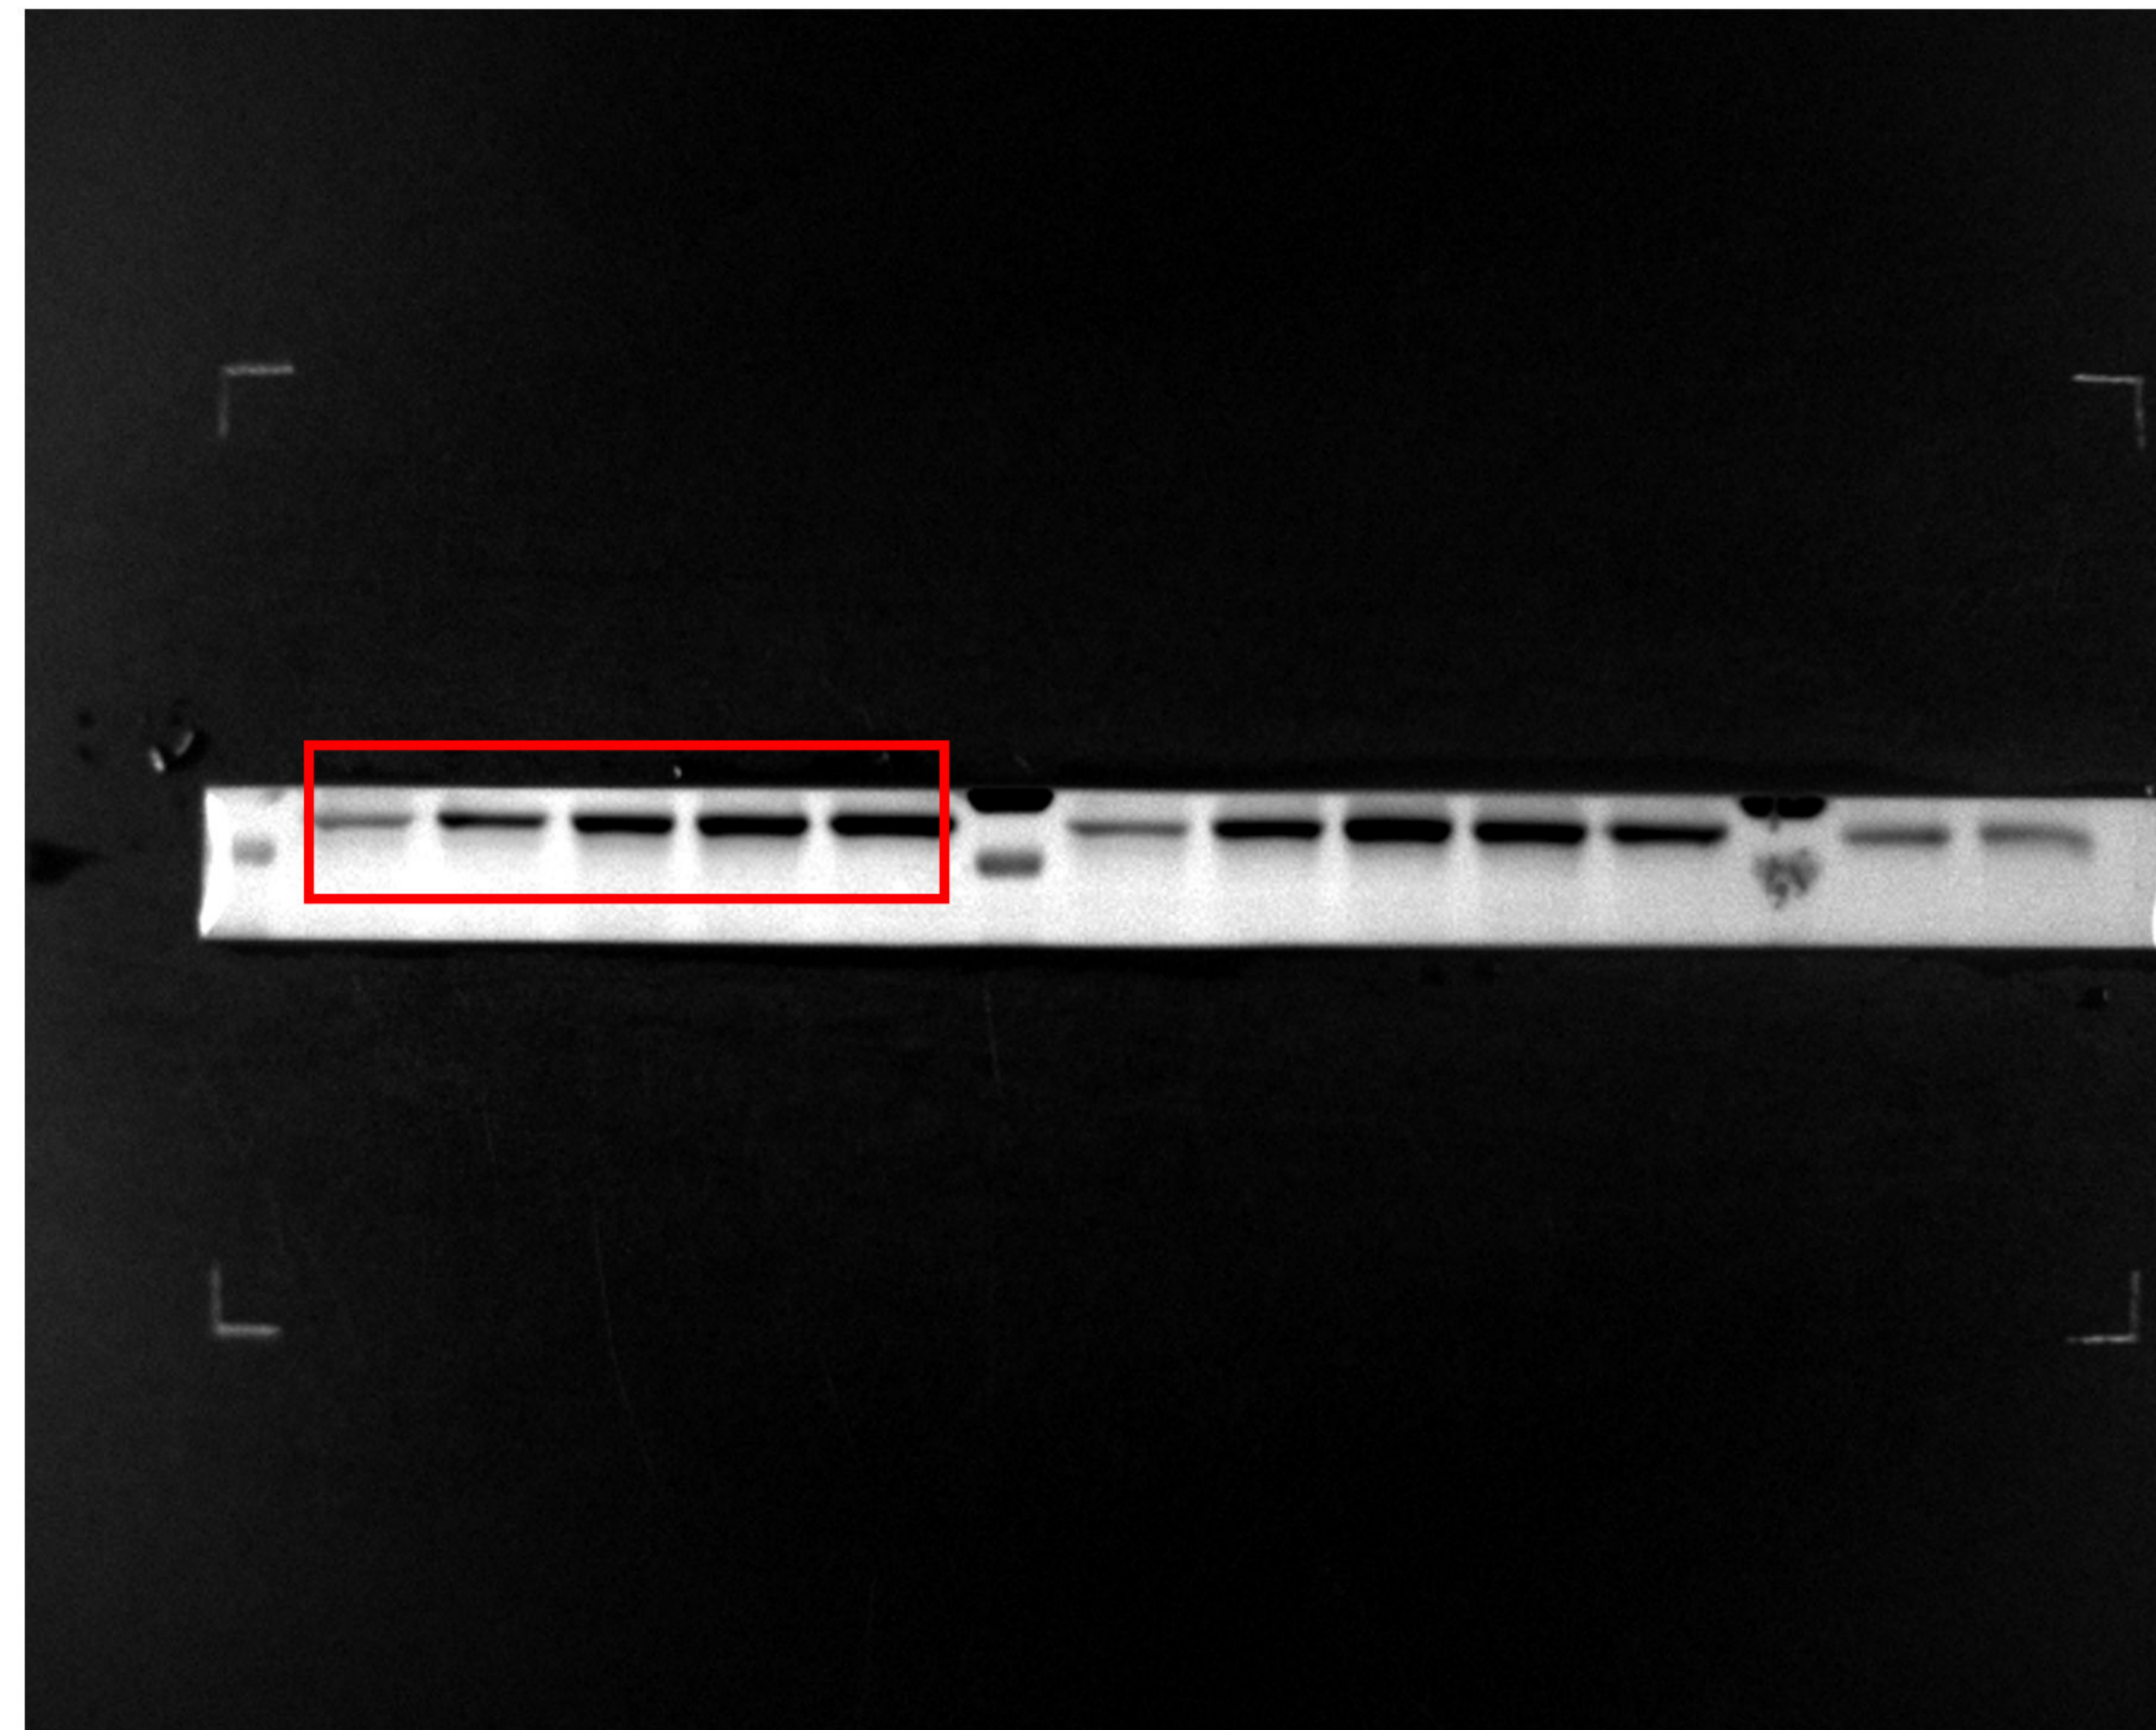

SQLE

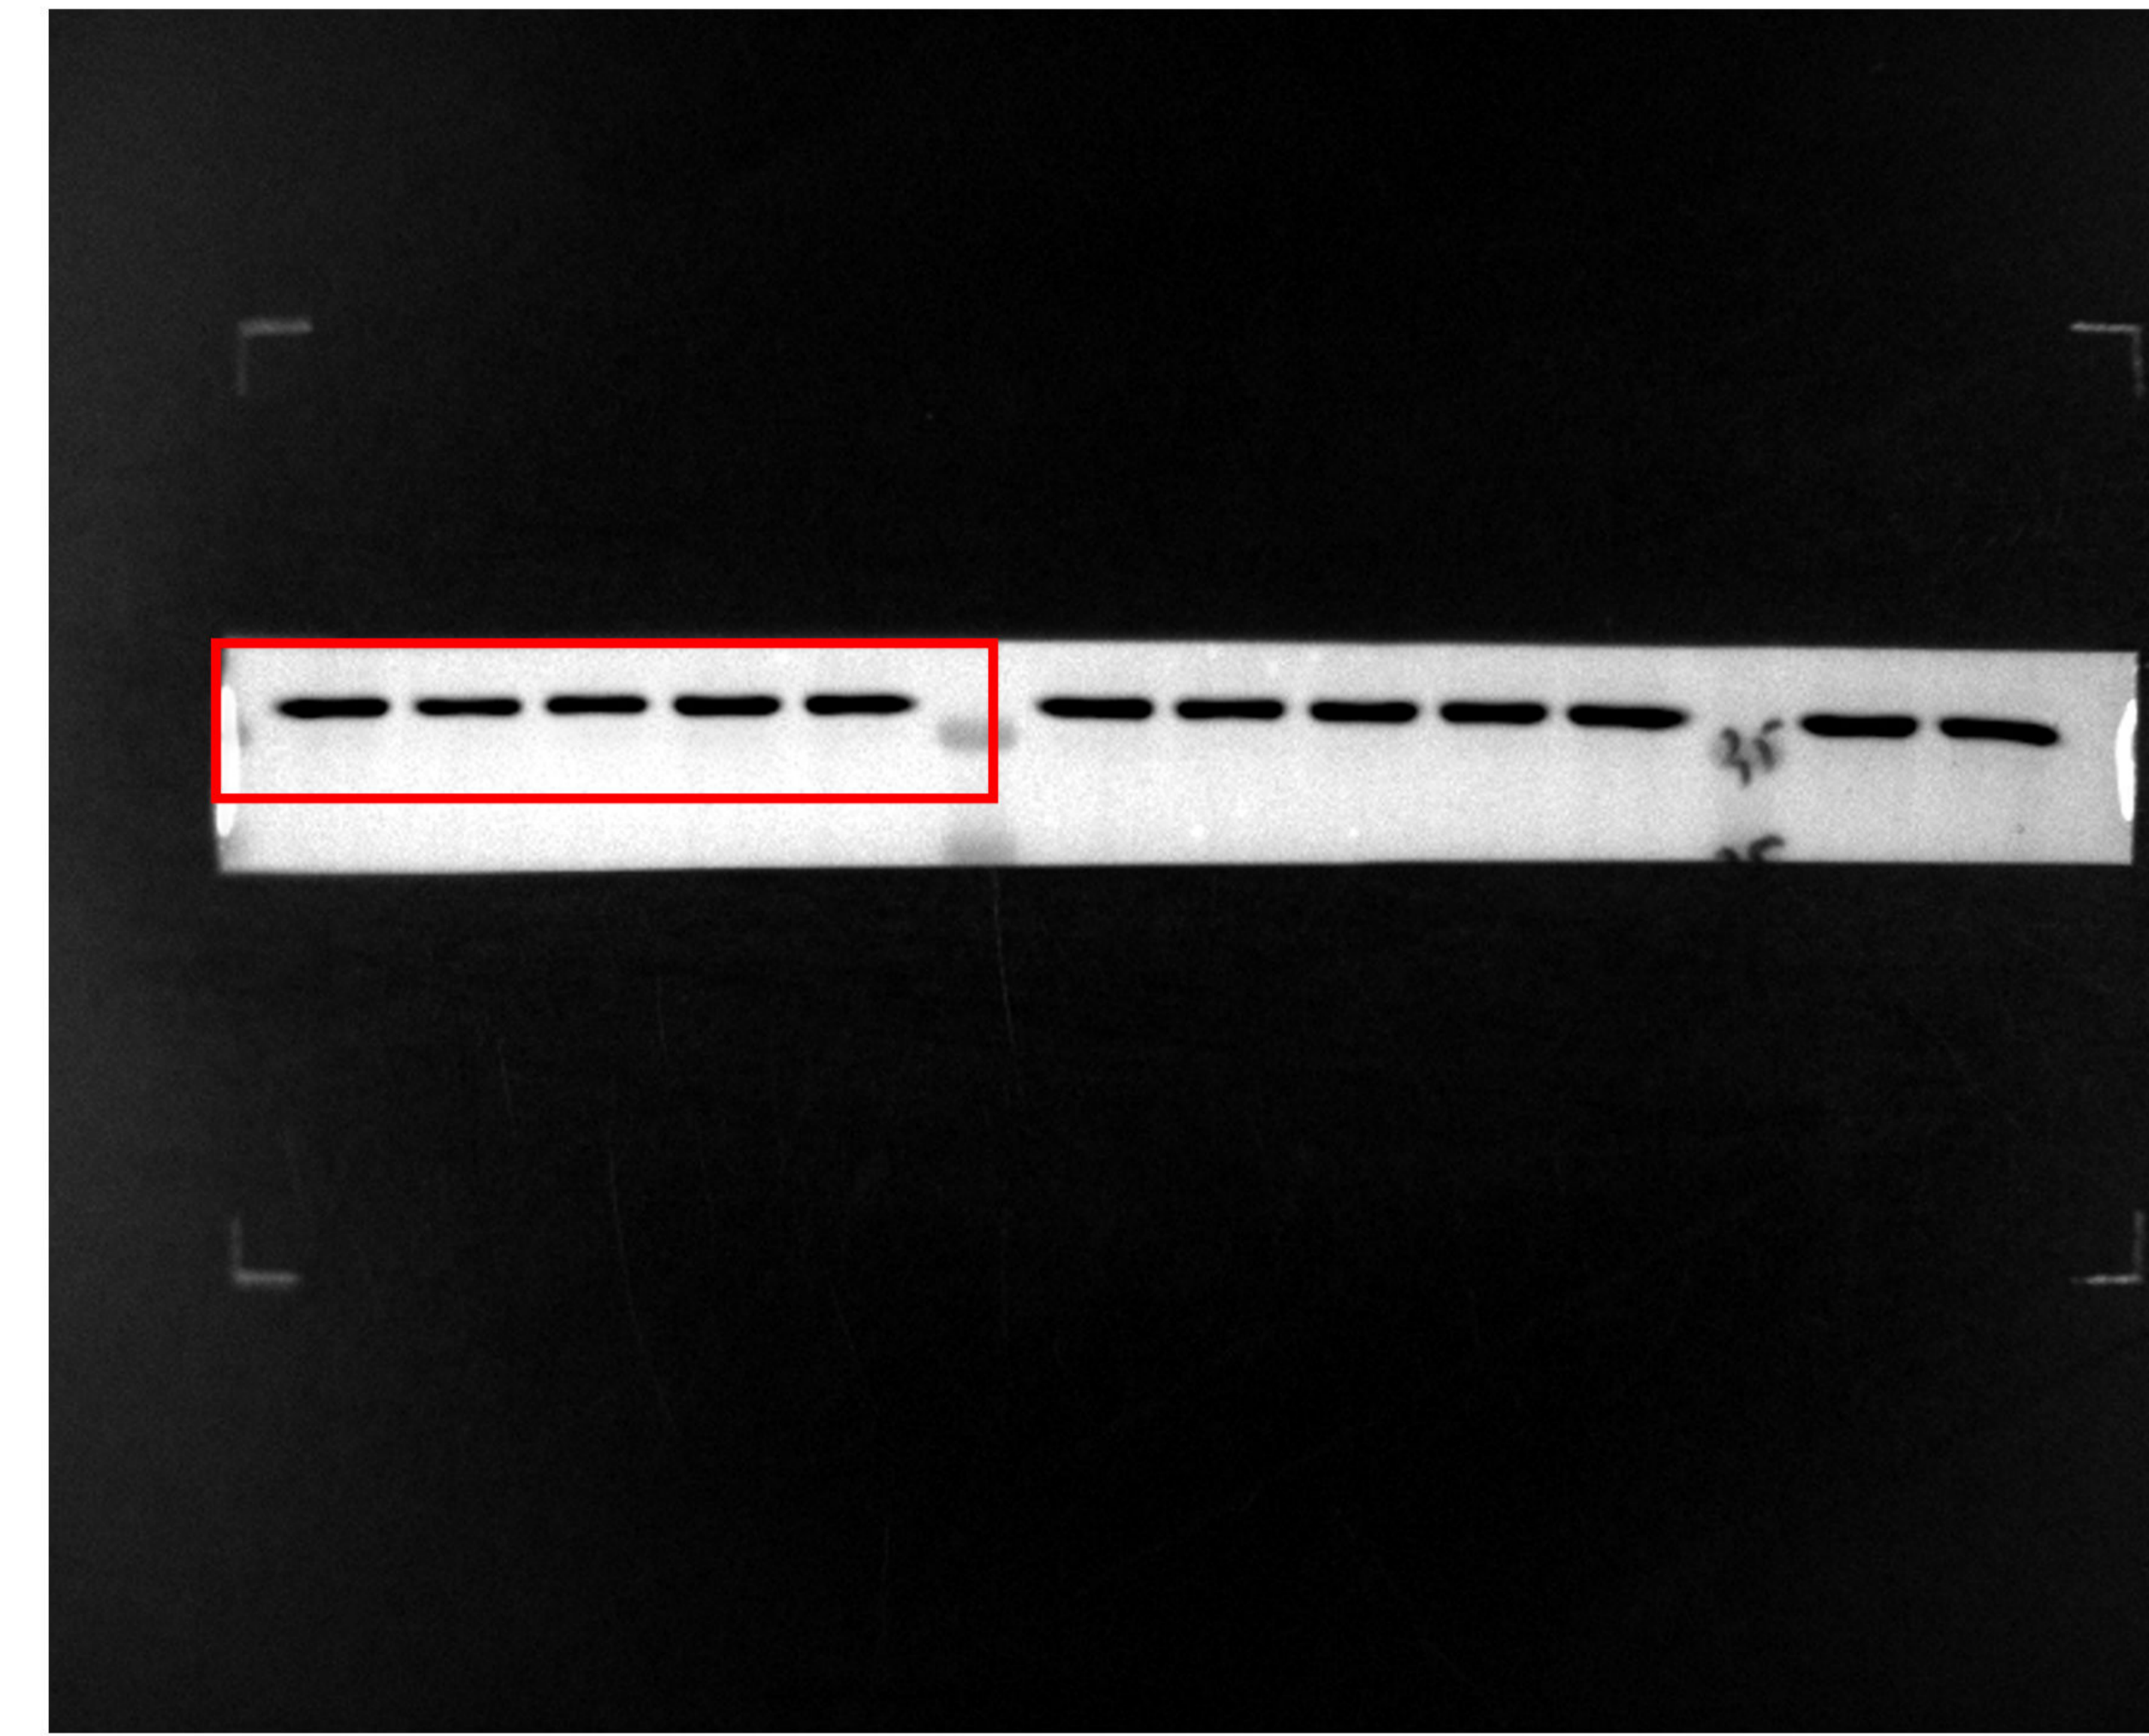

GAPDH

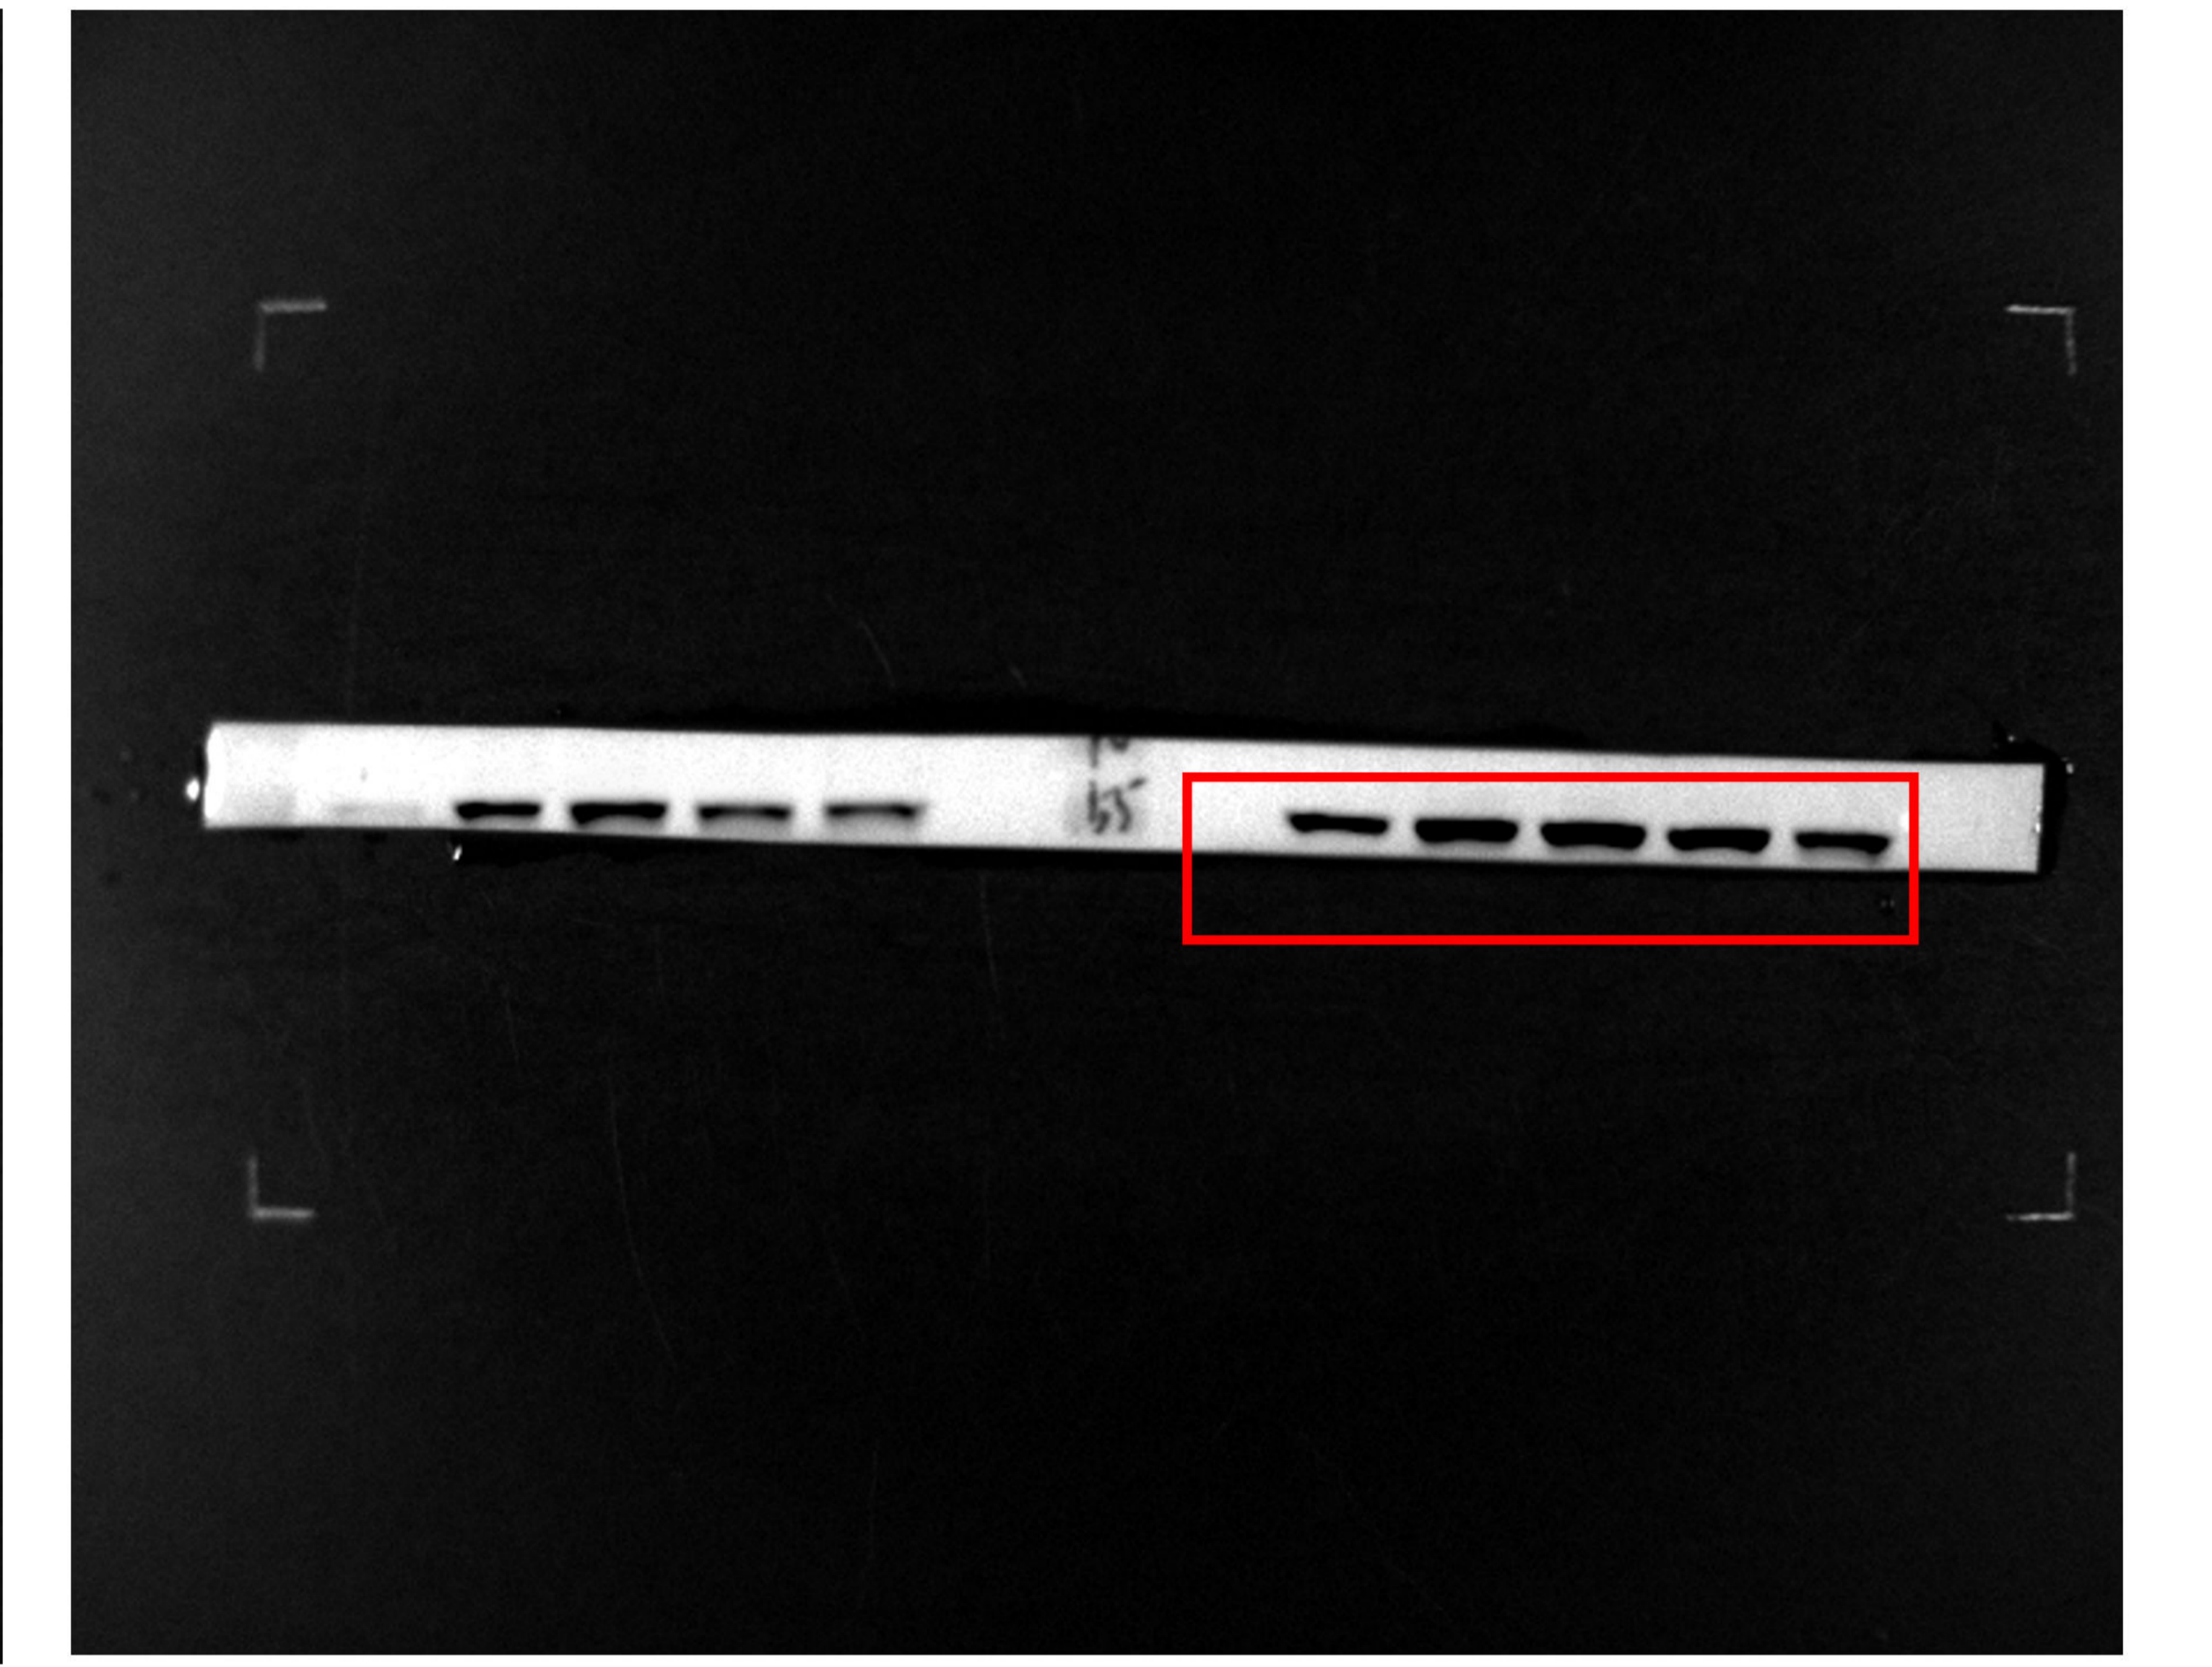

HMGCS1

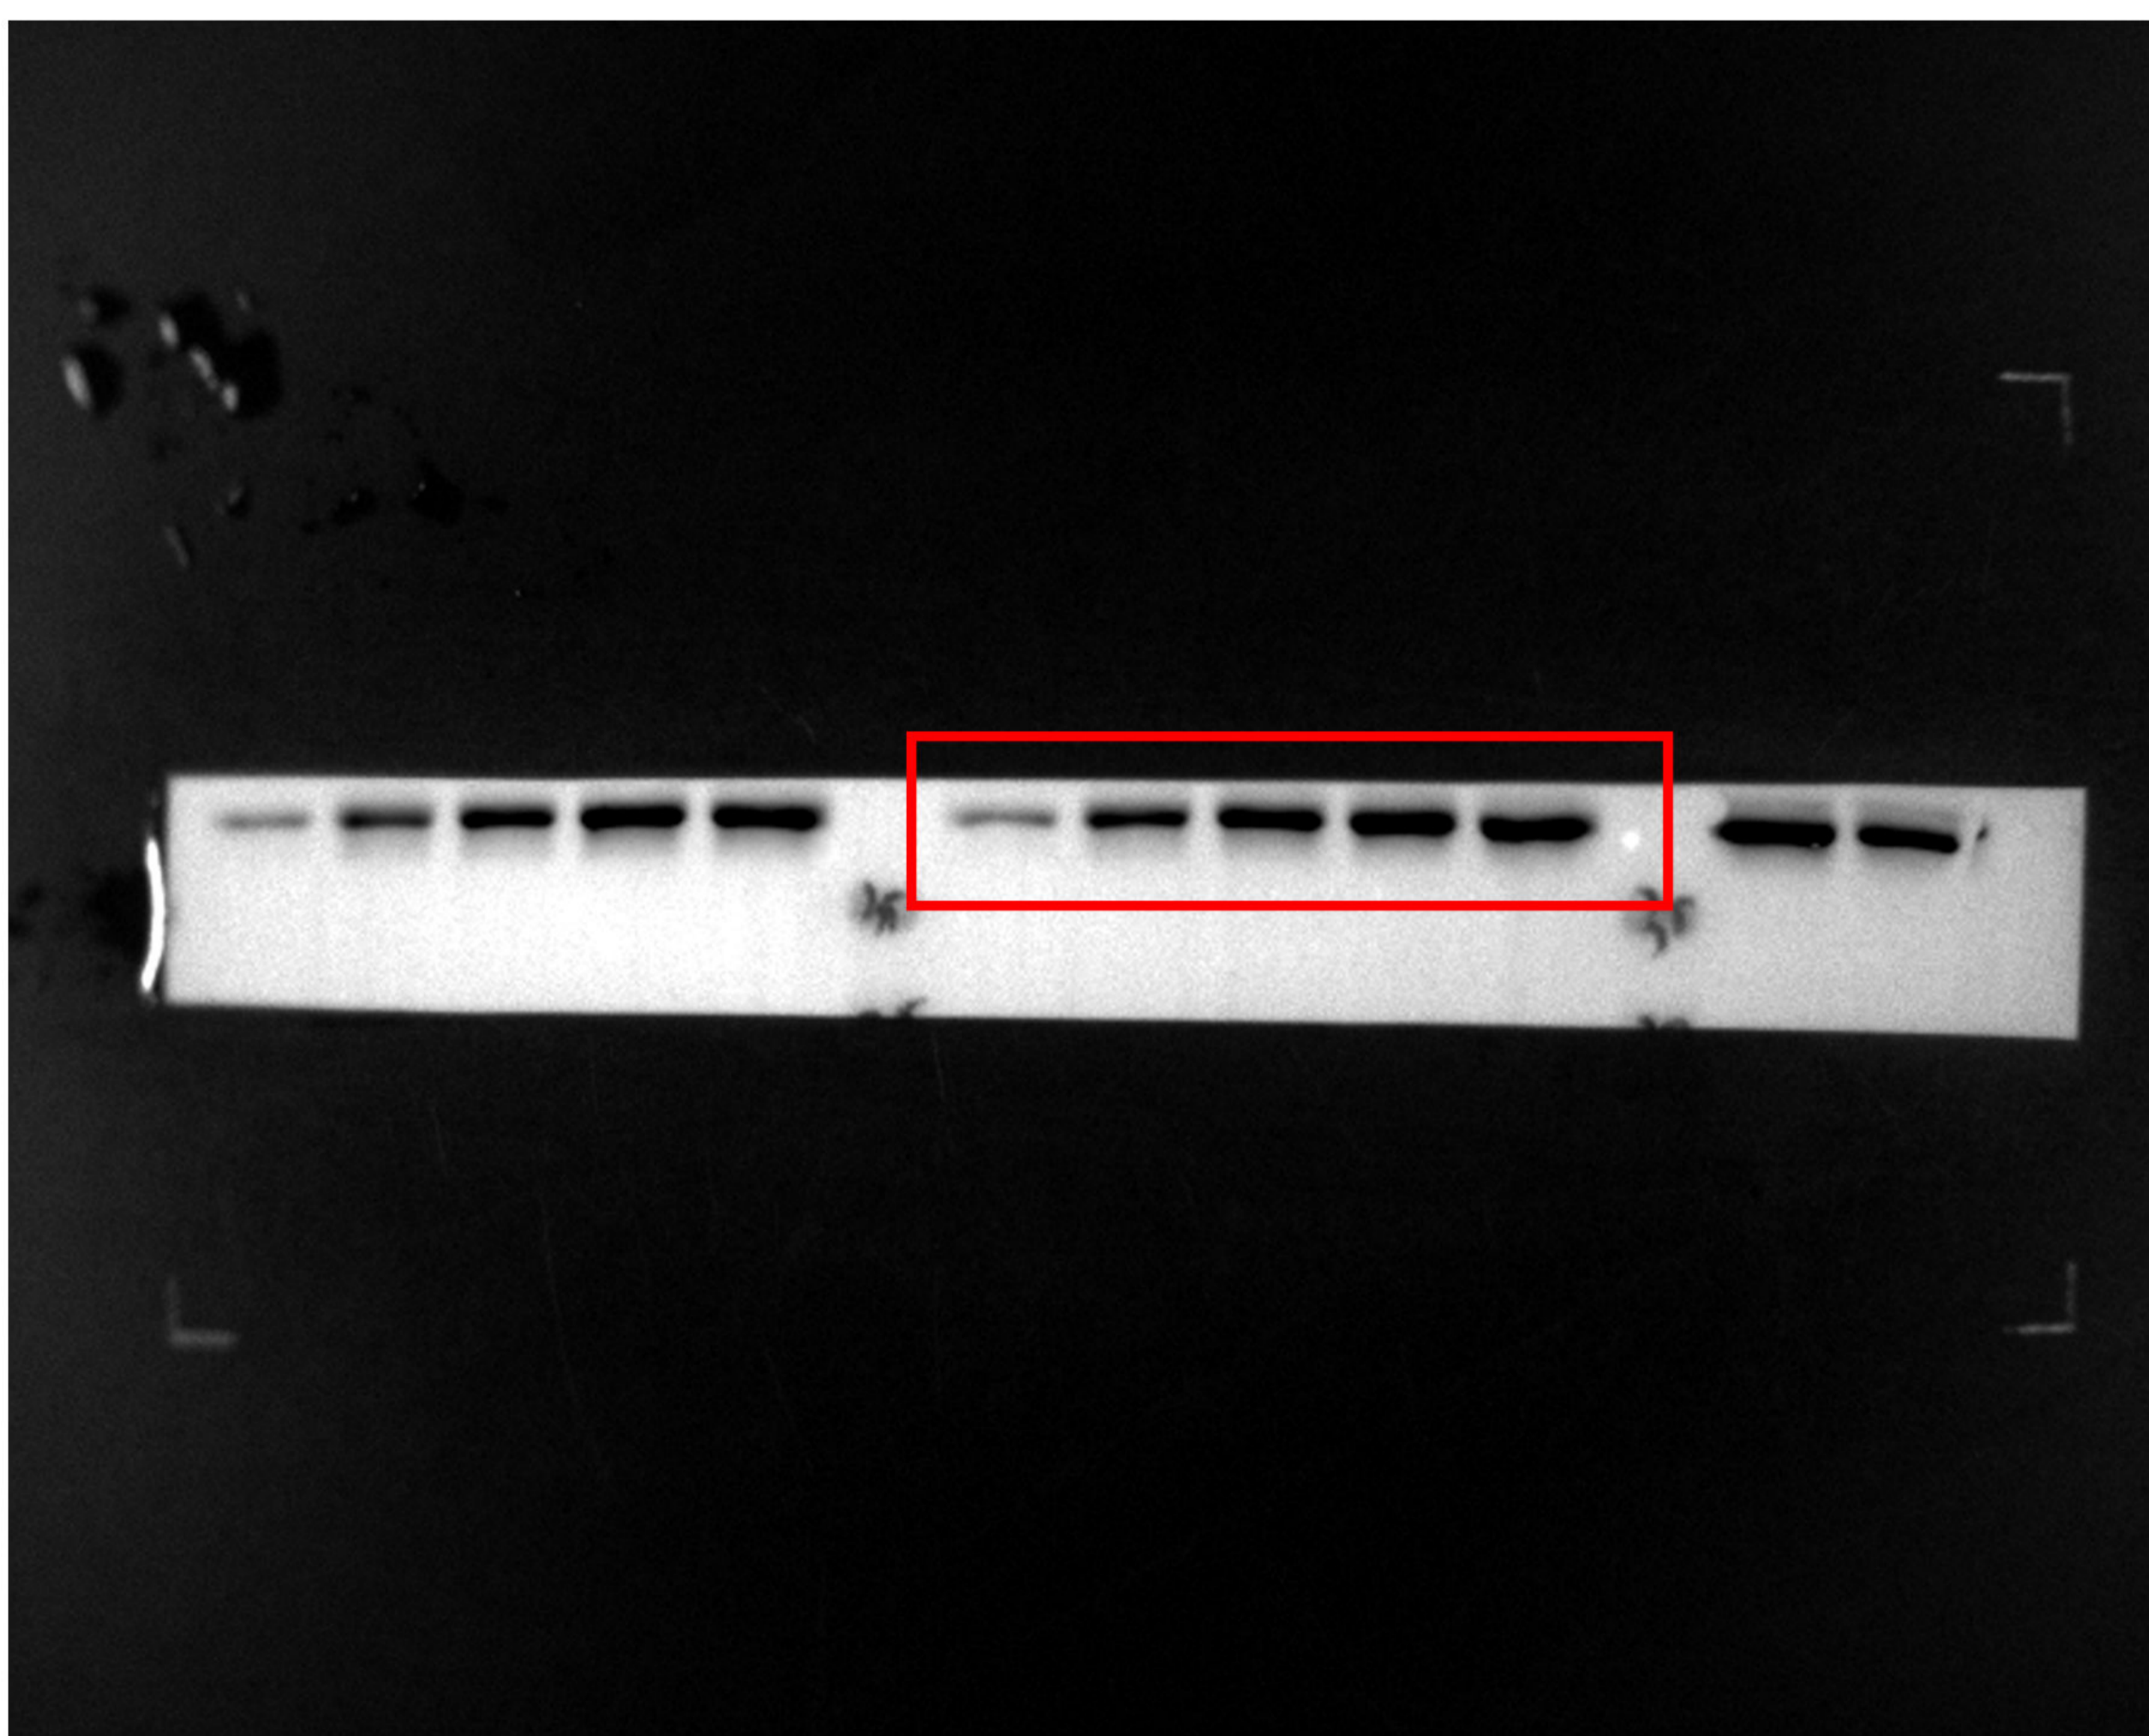

MVK

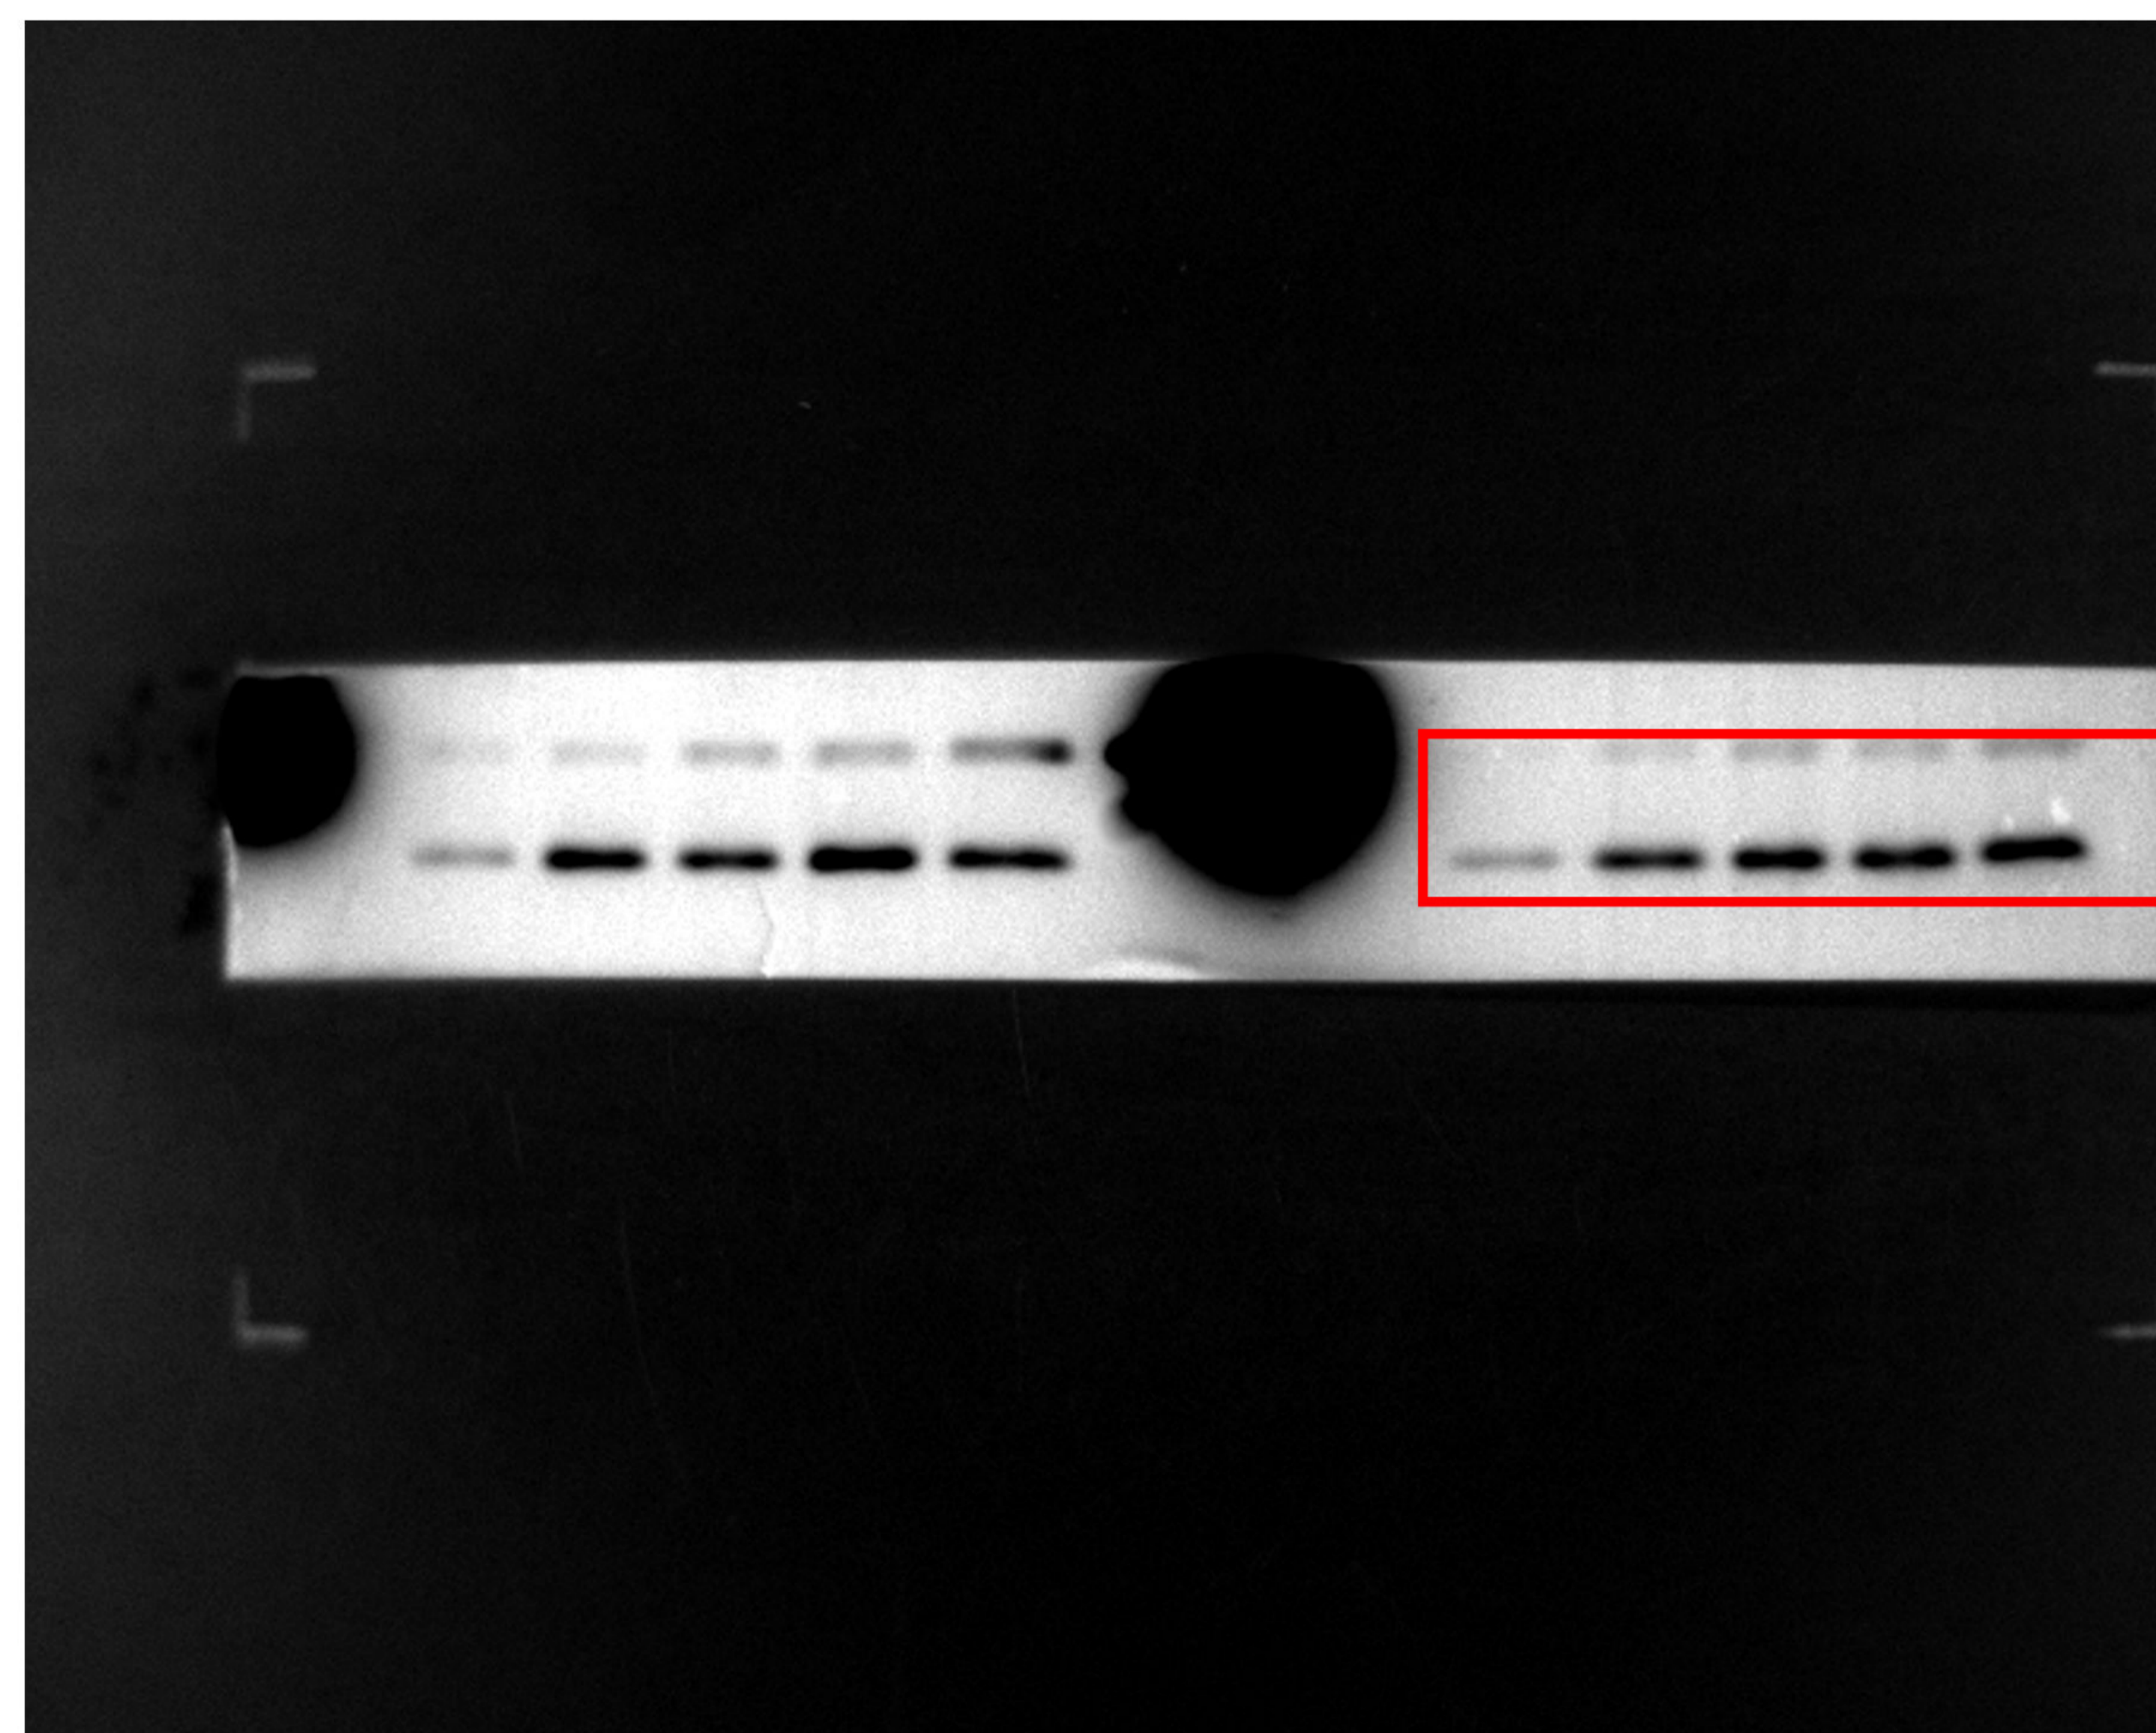

IDI1

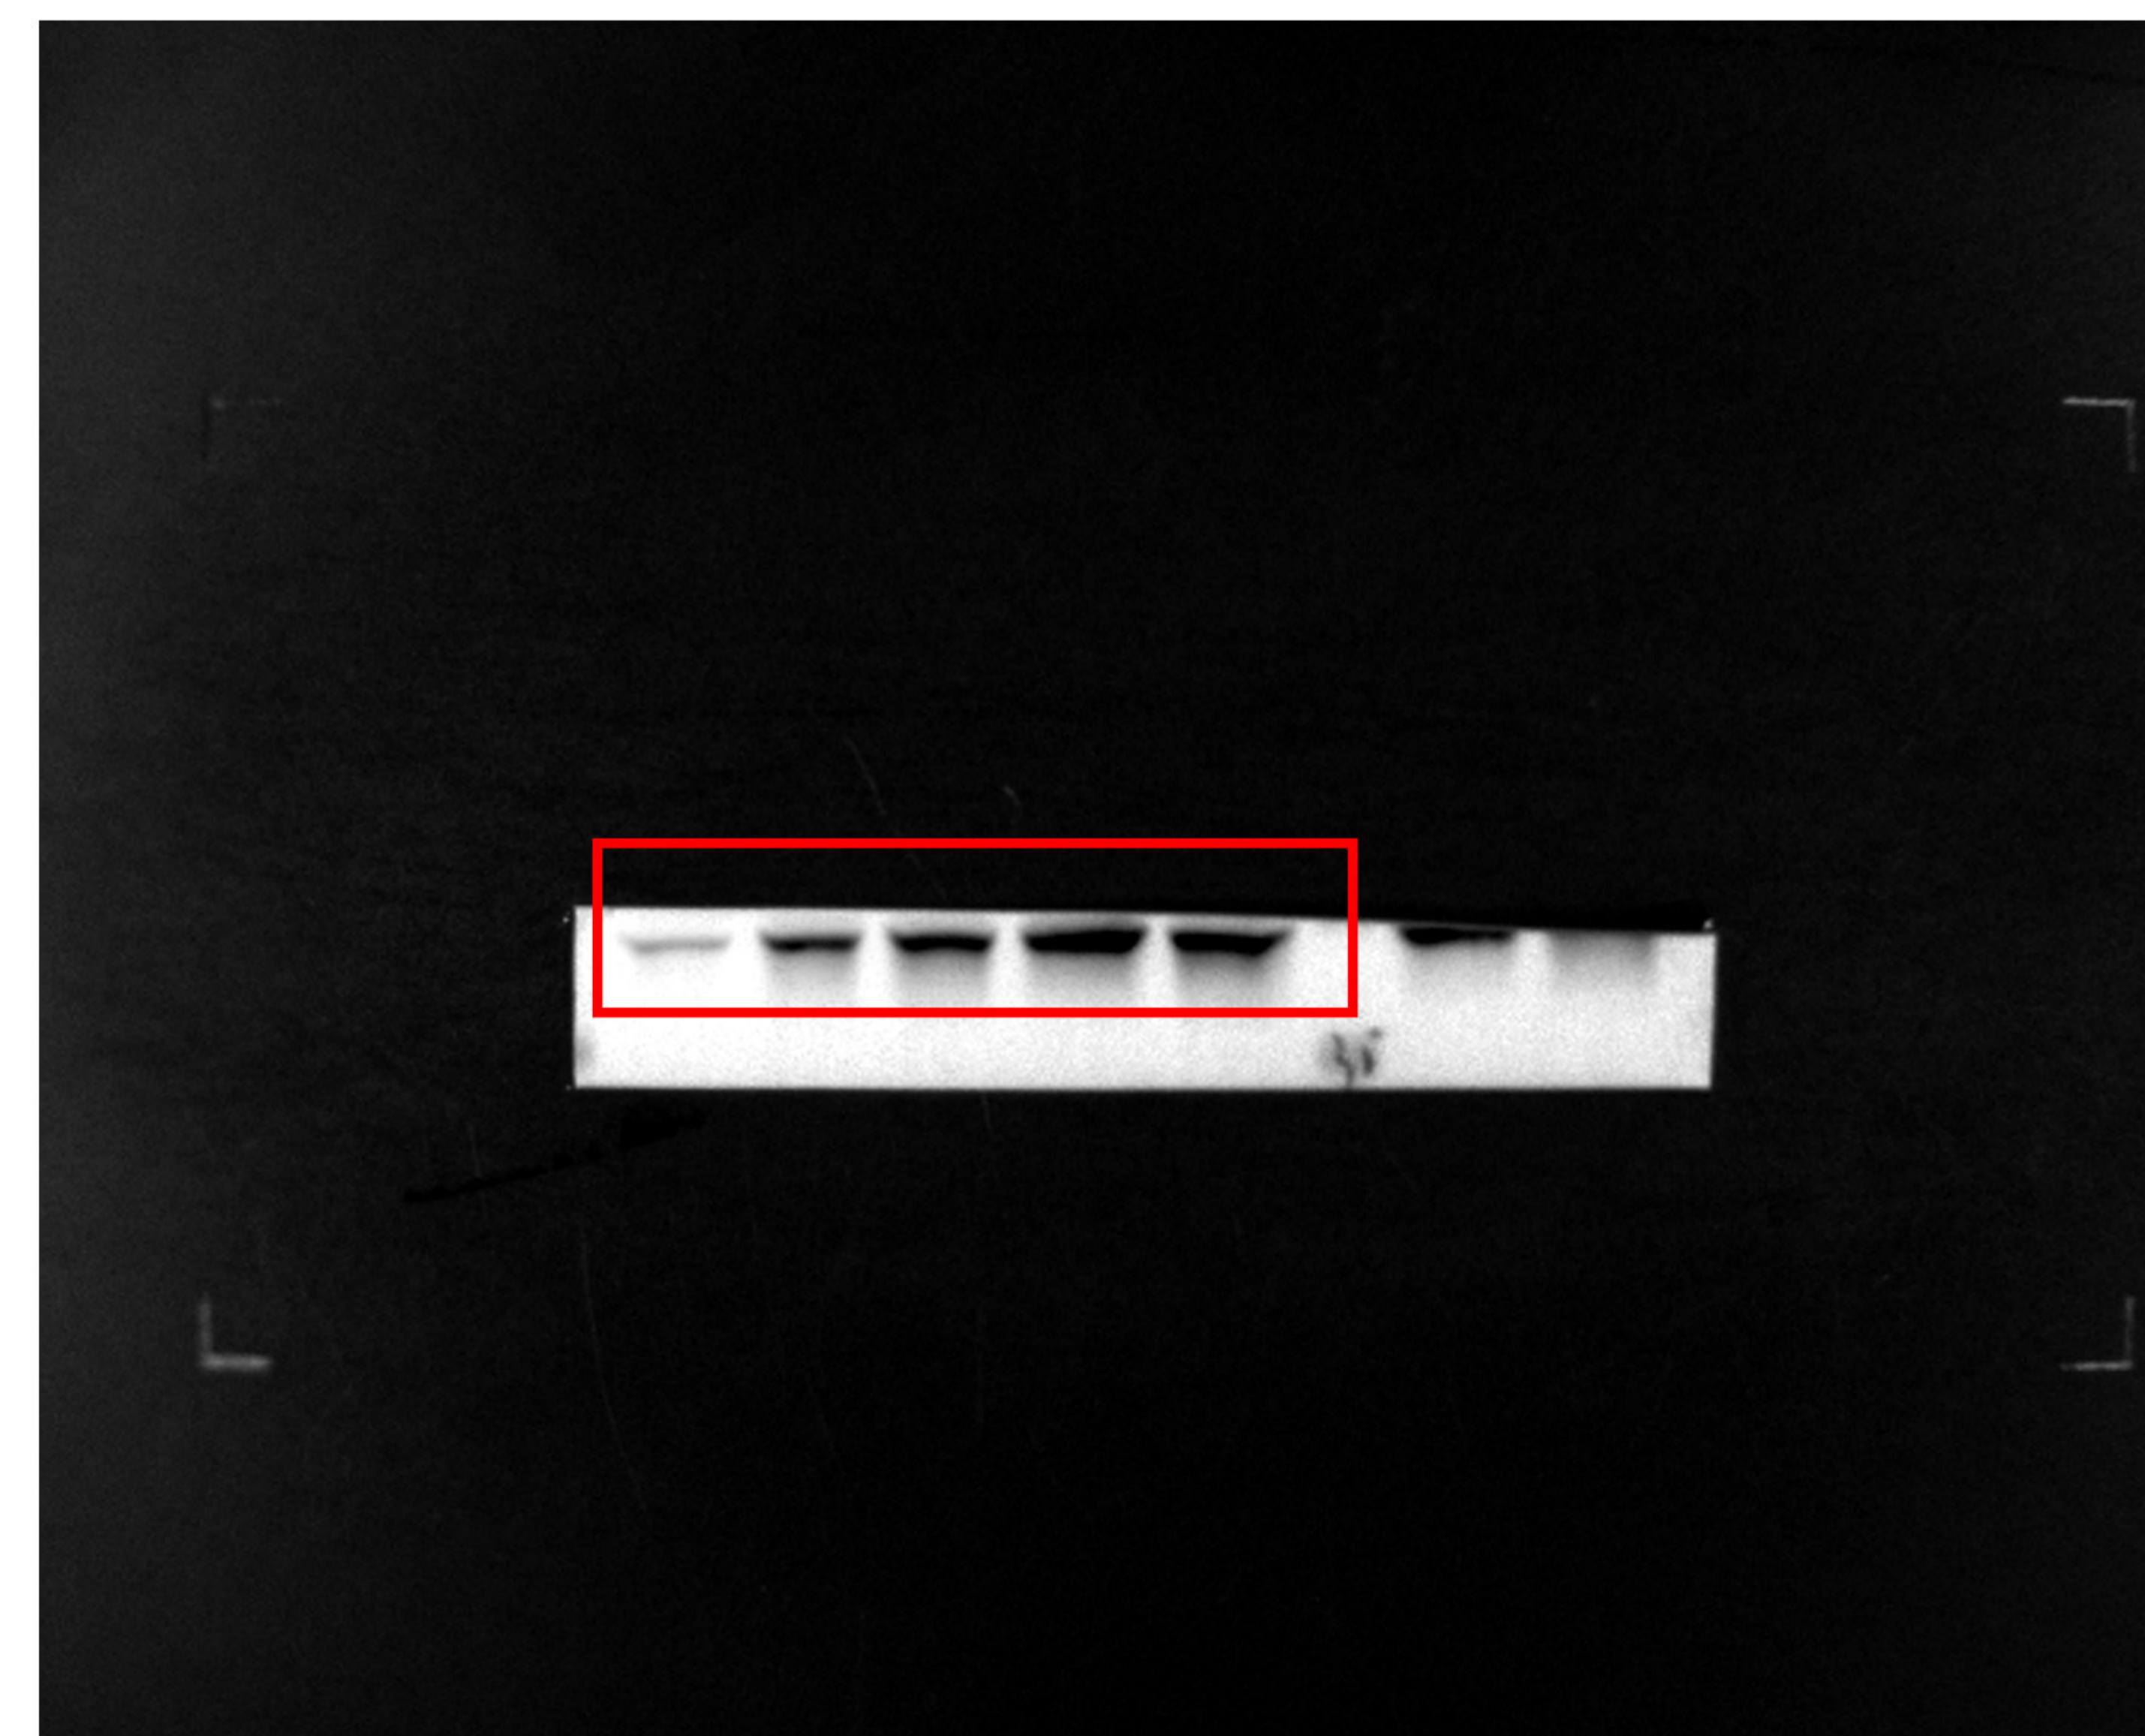

FDFT1

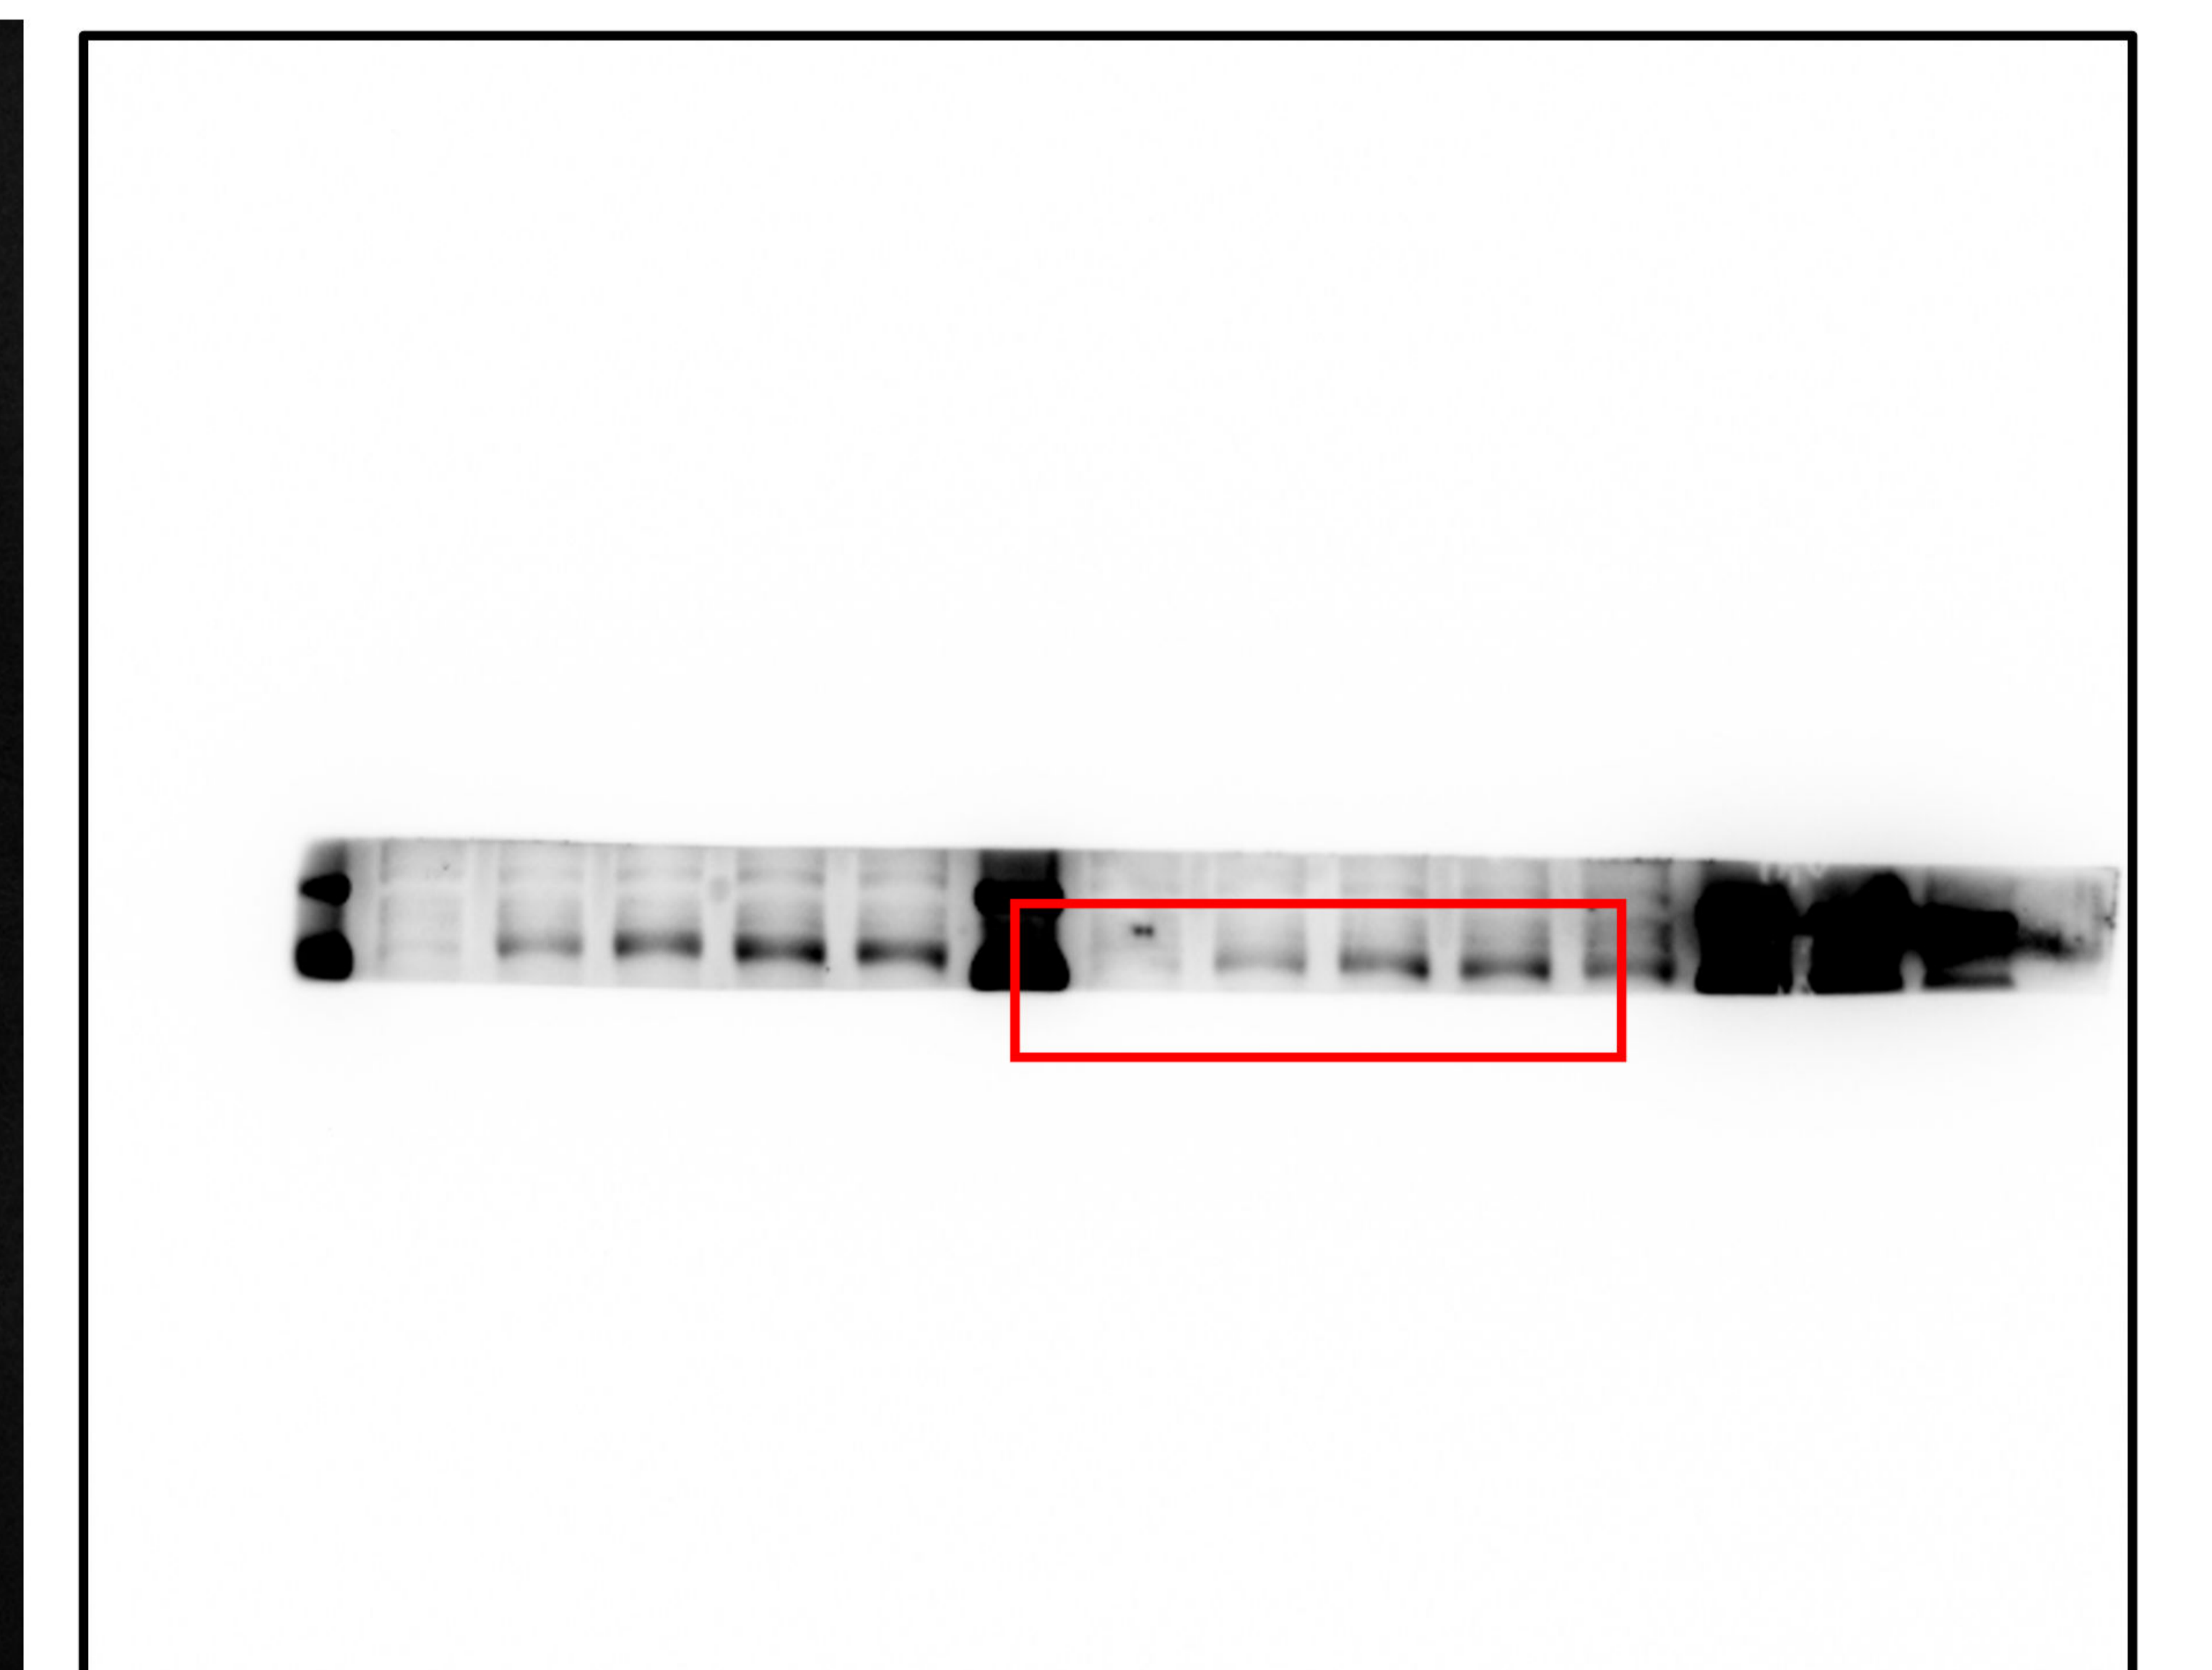

LSS

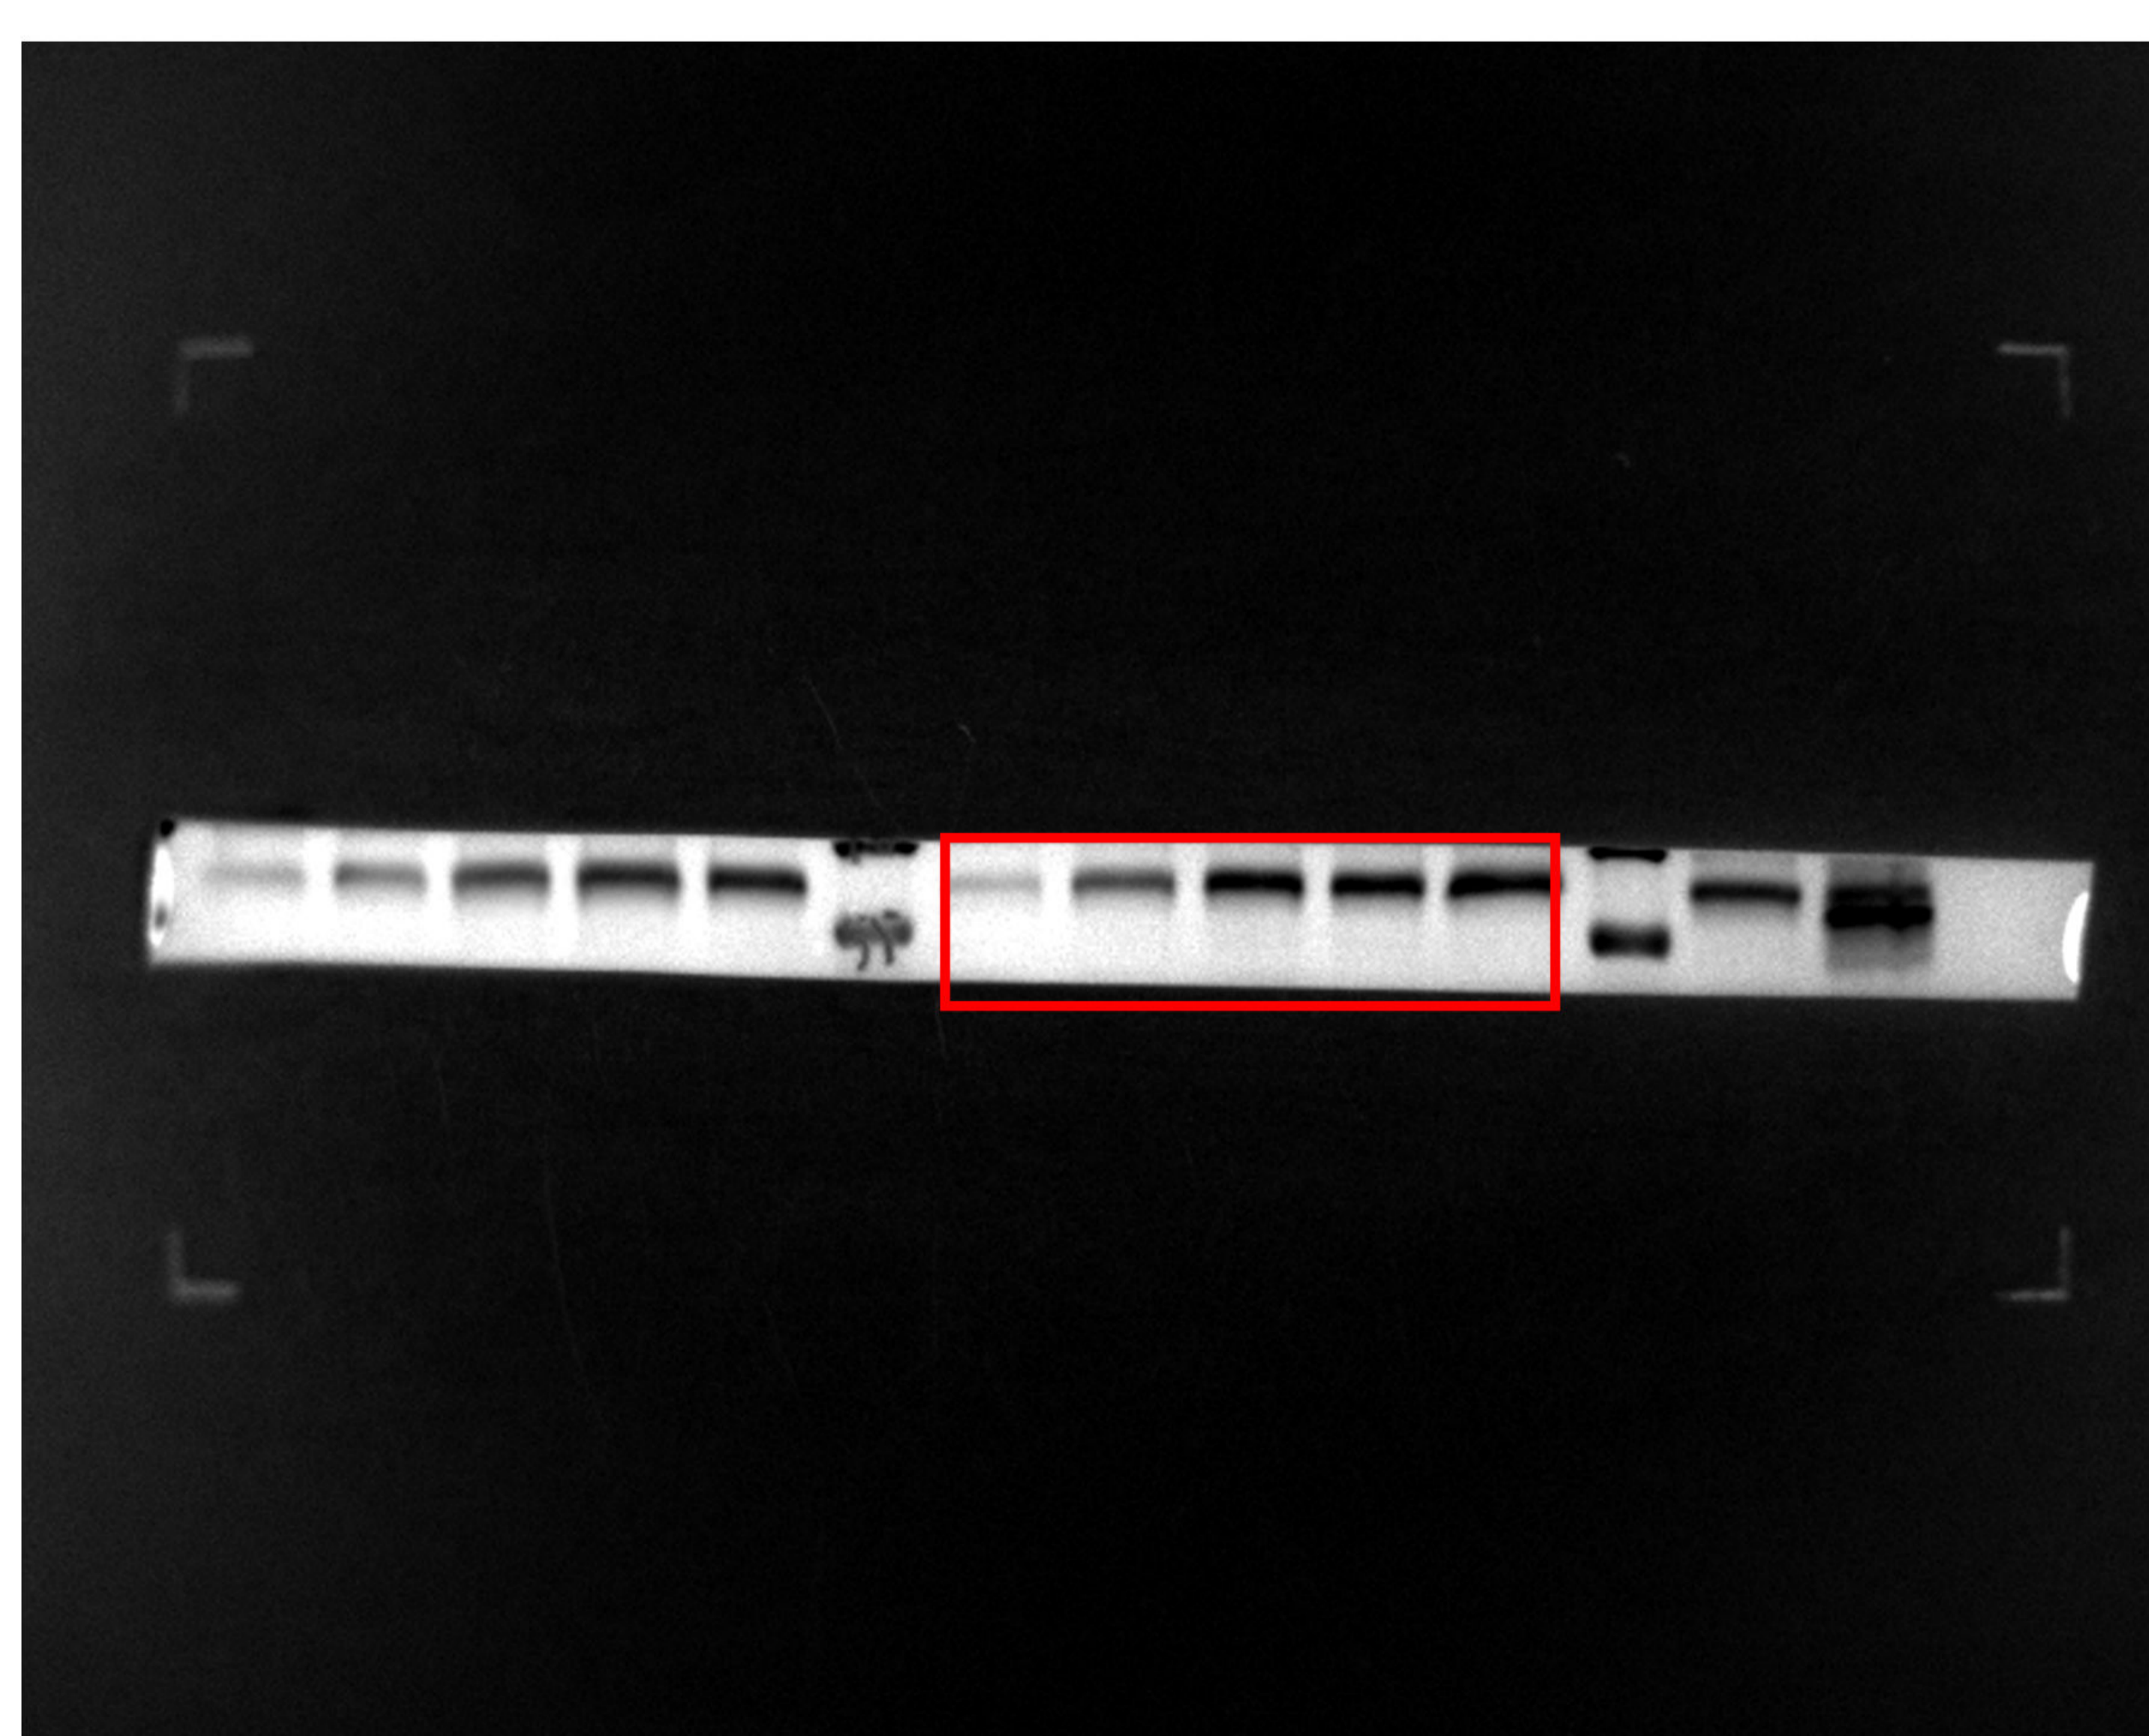

SQLE

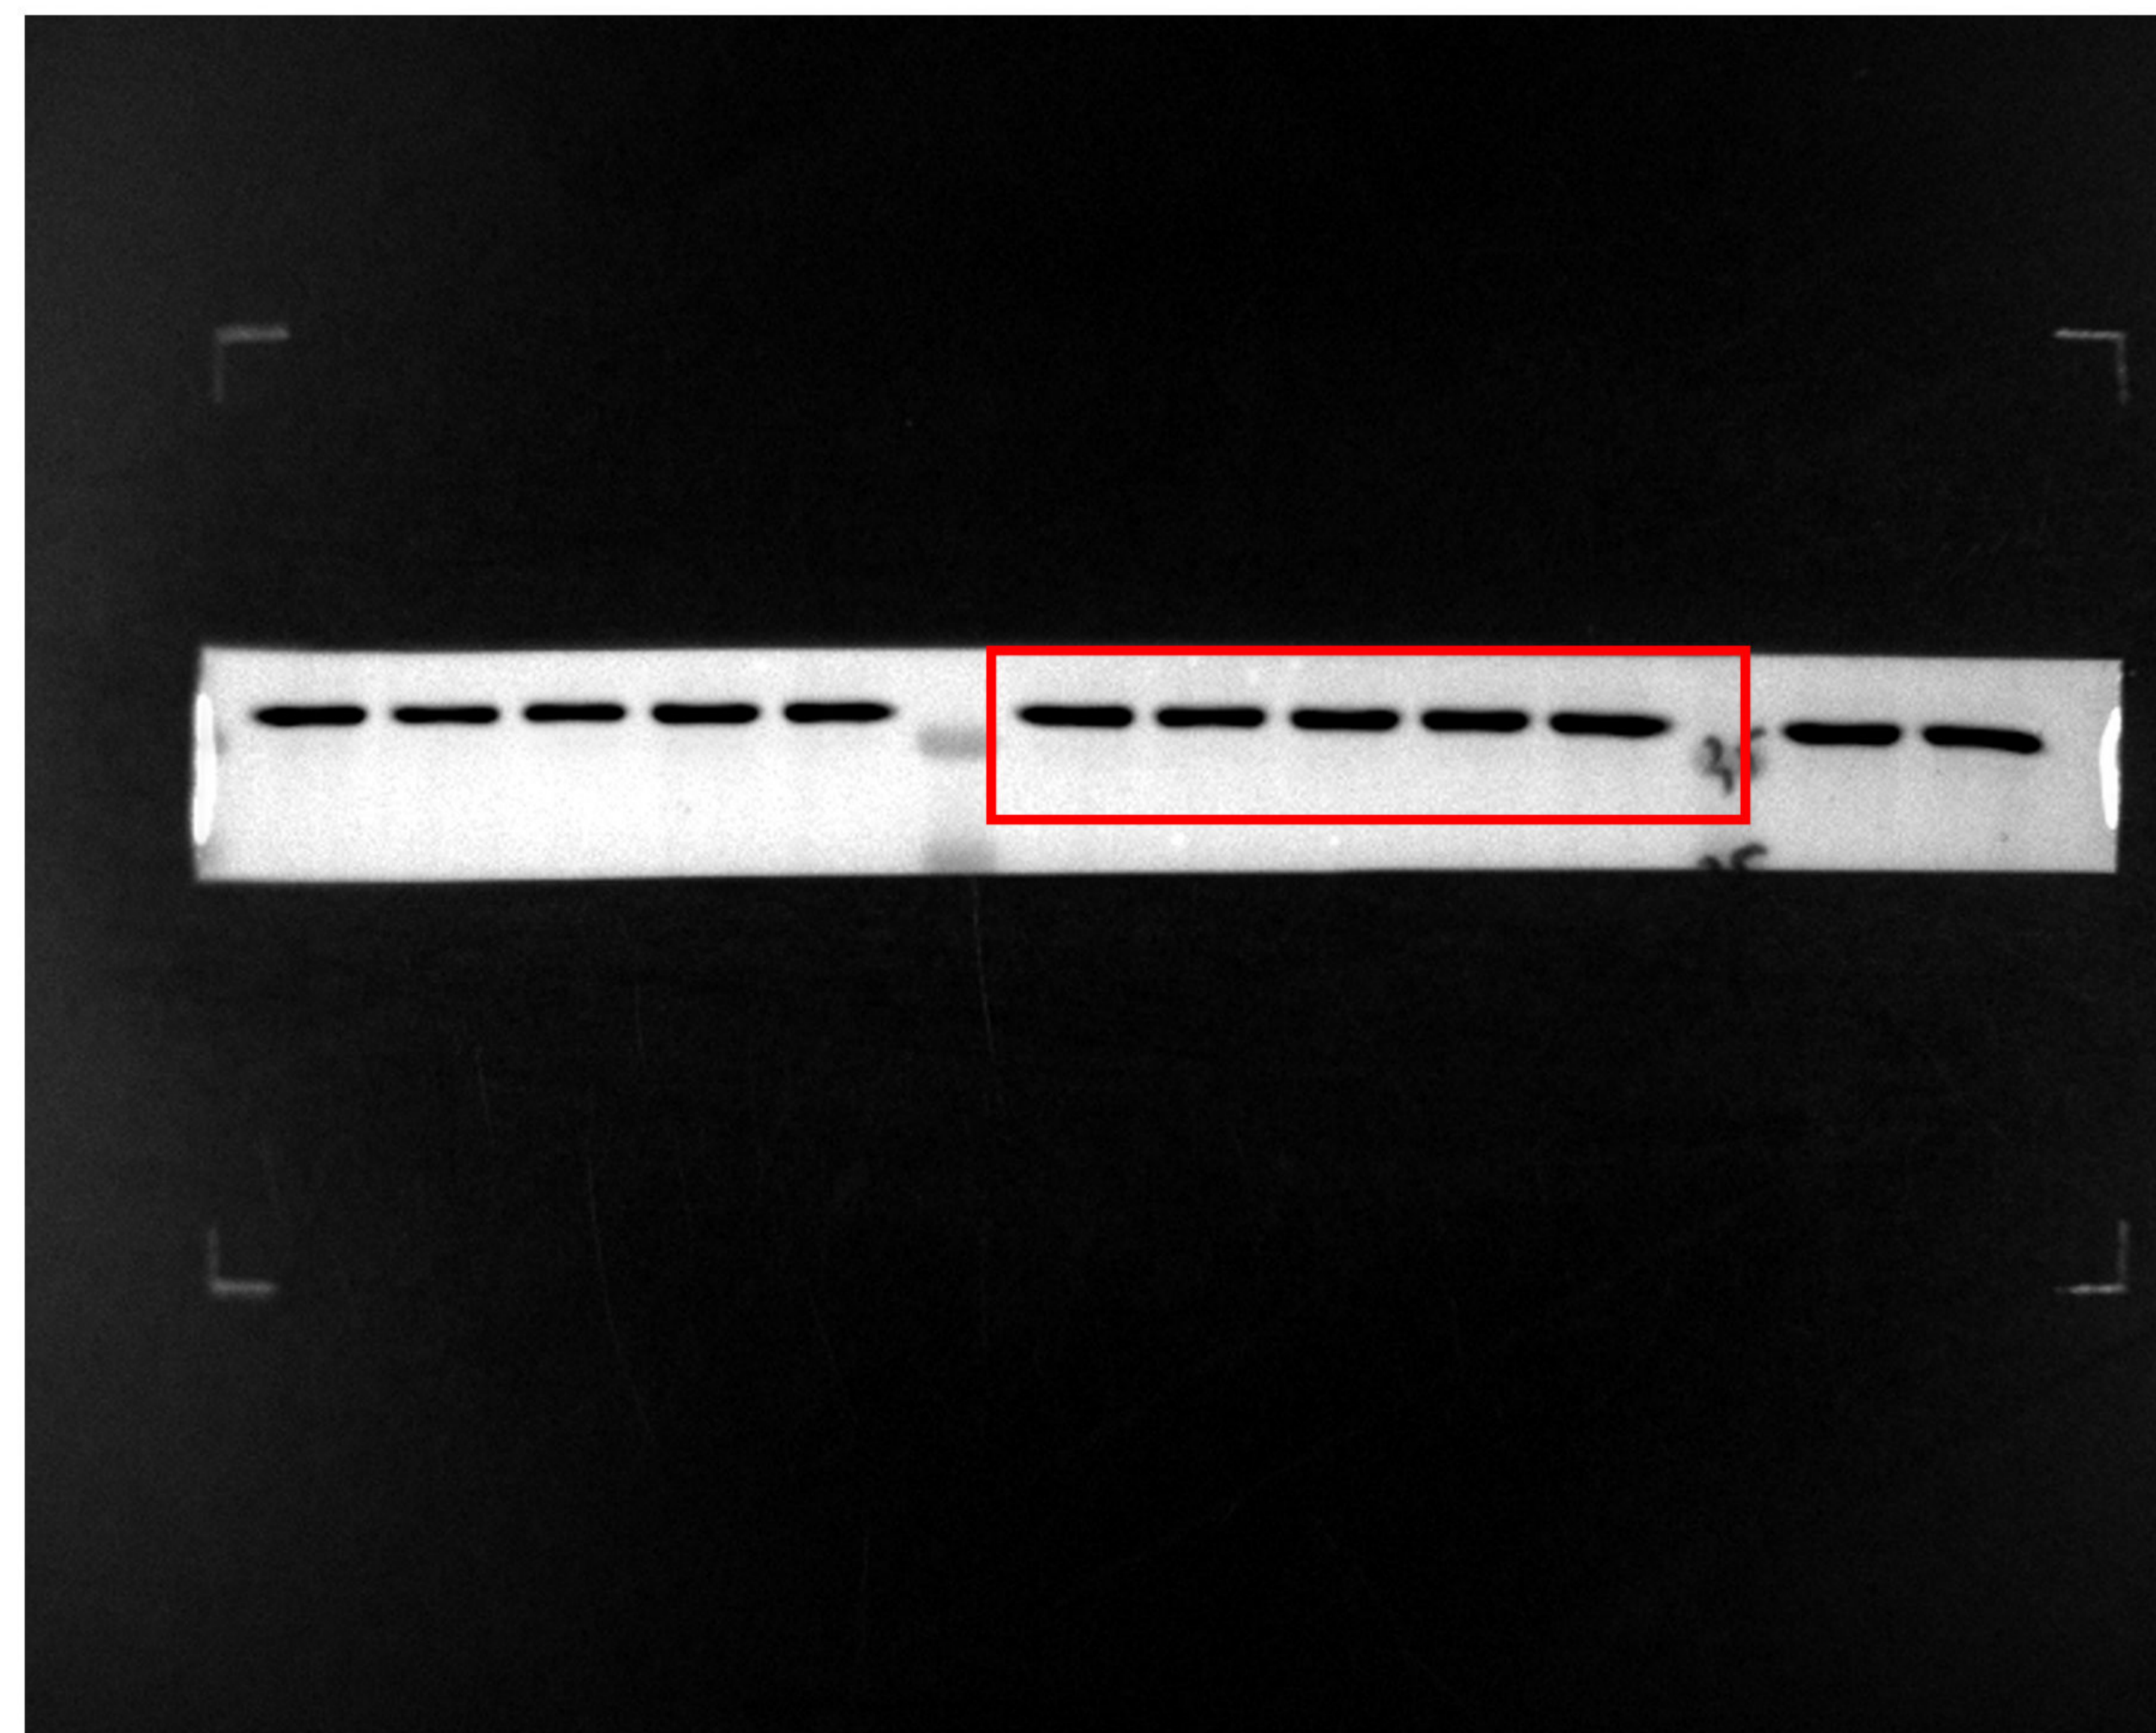

GAPDH



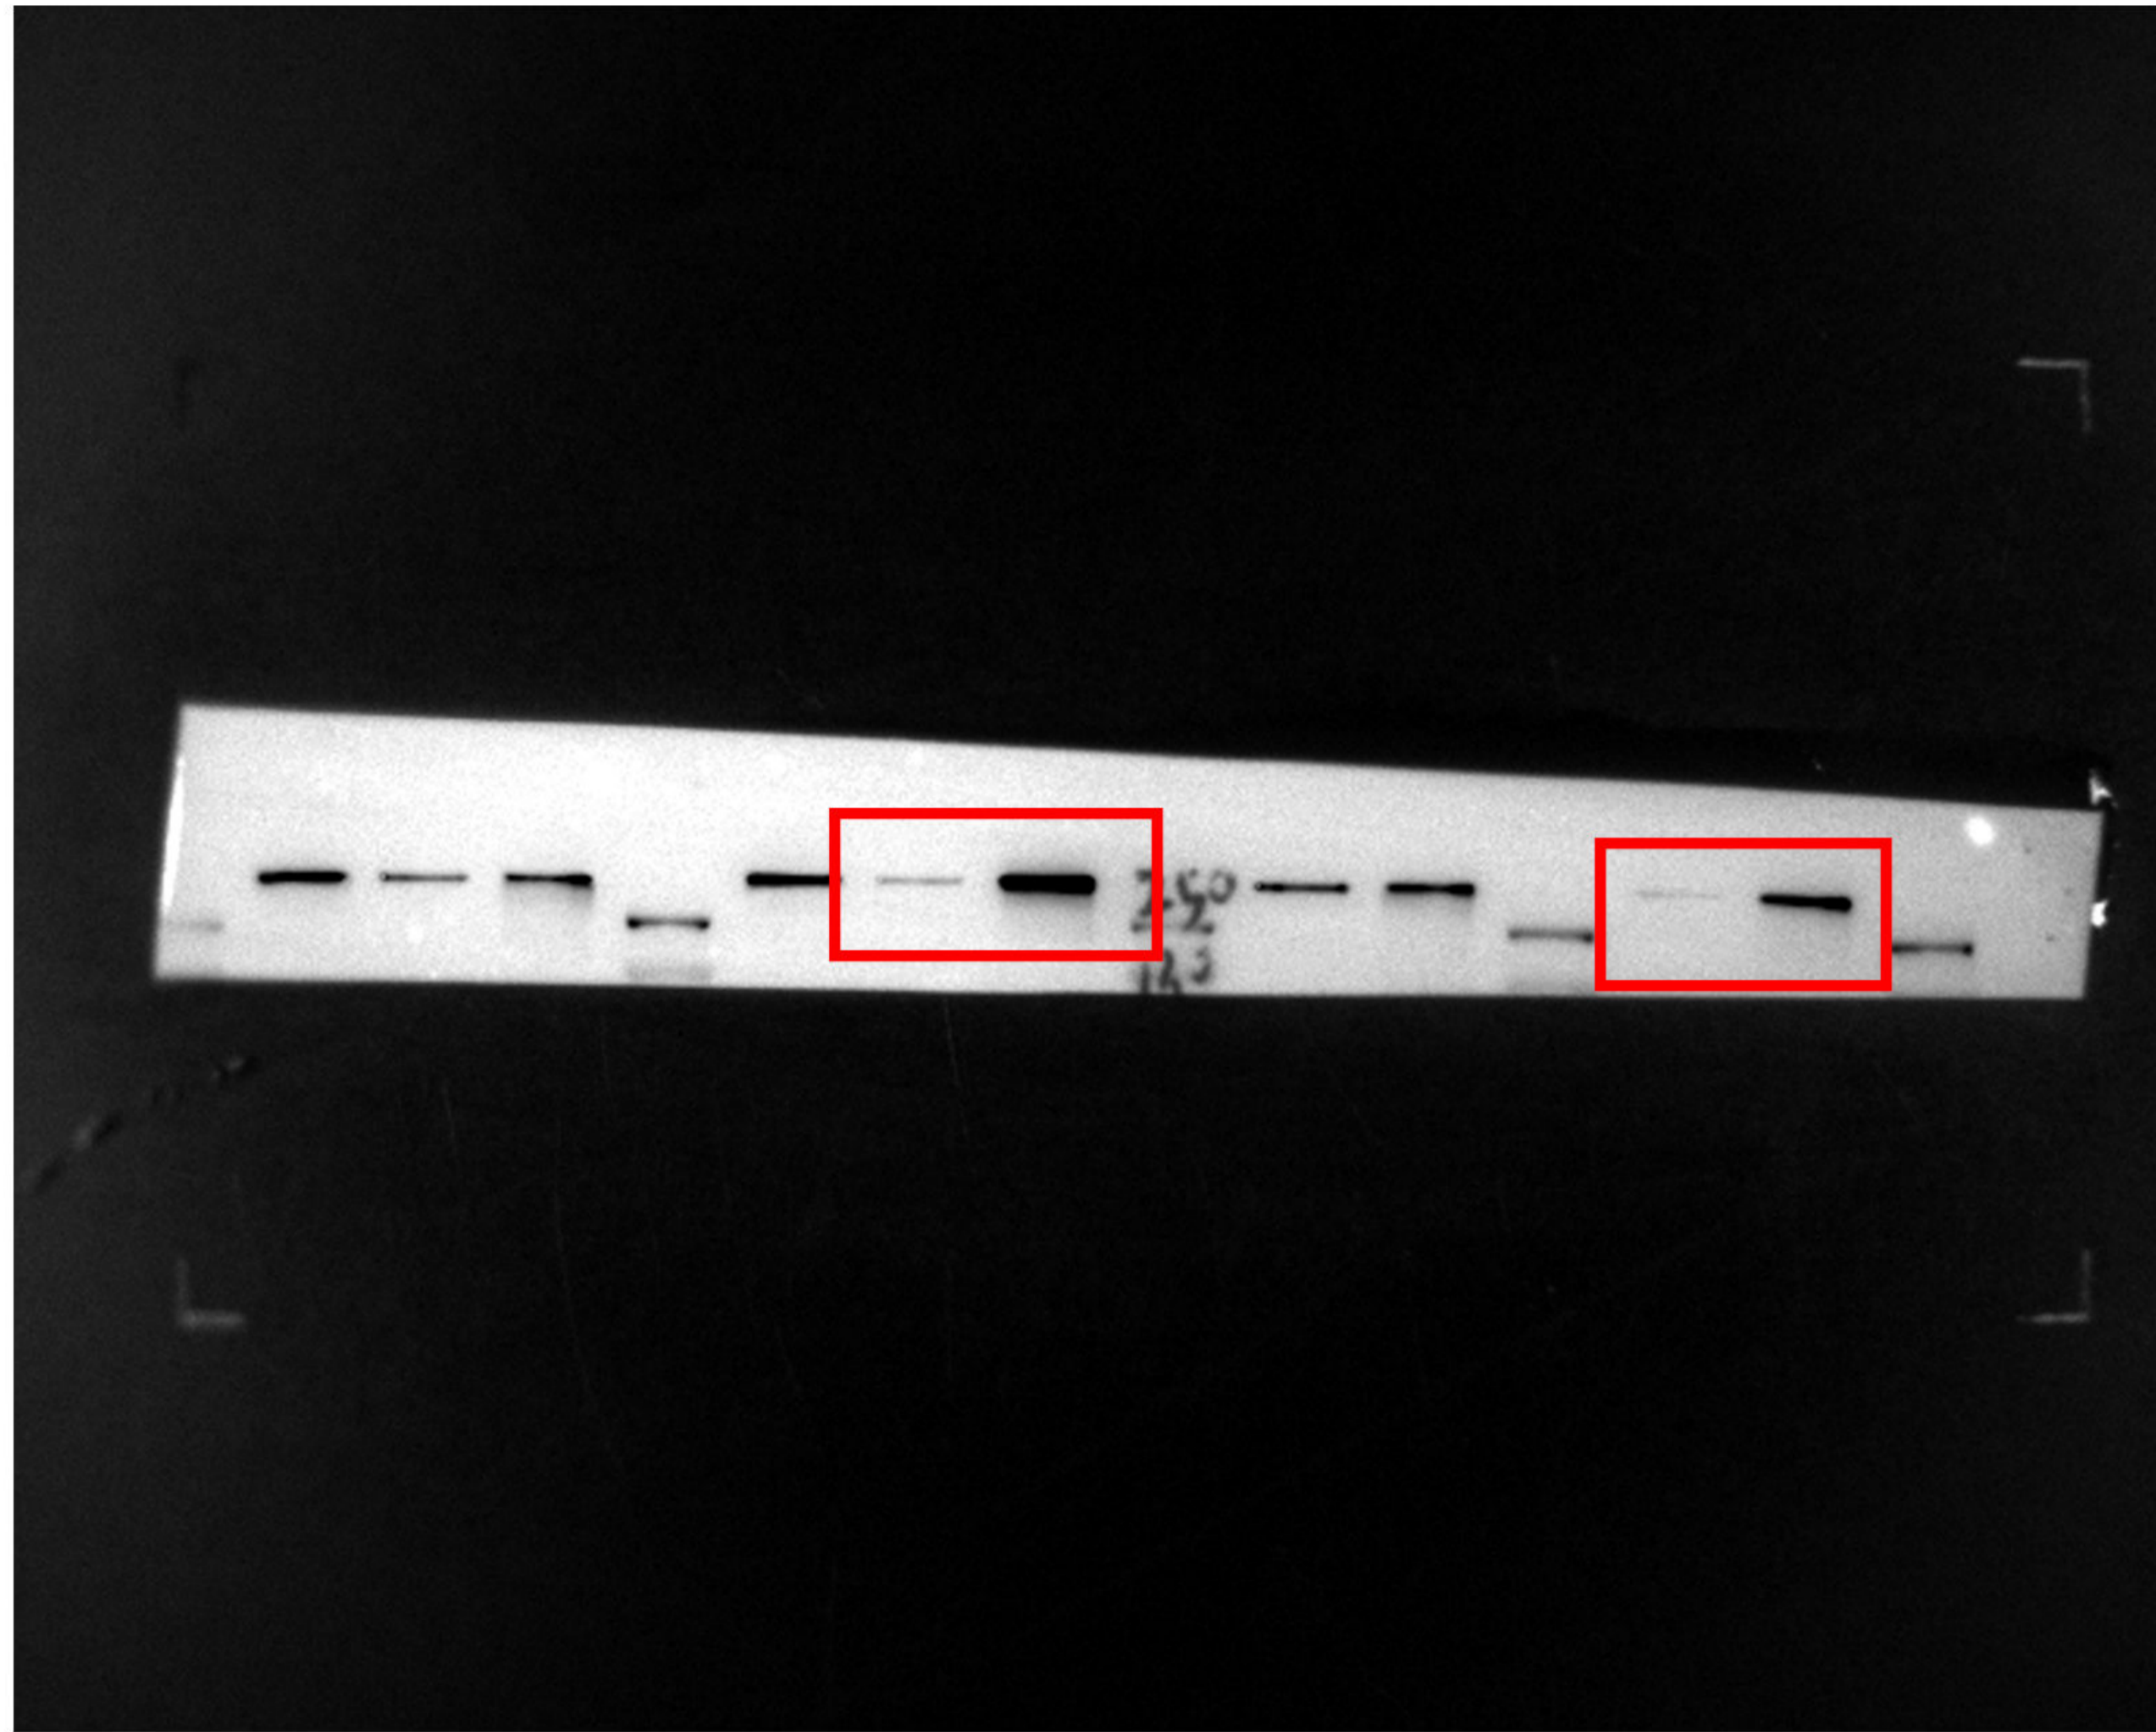

**ABCA1**

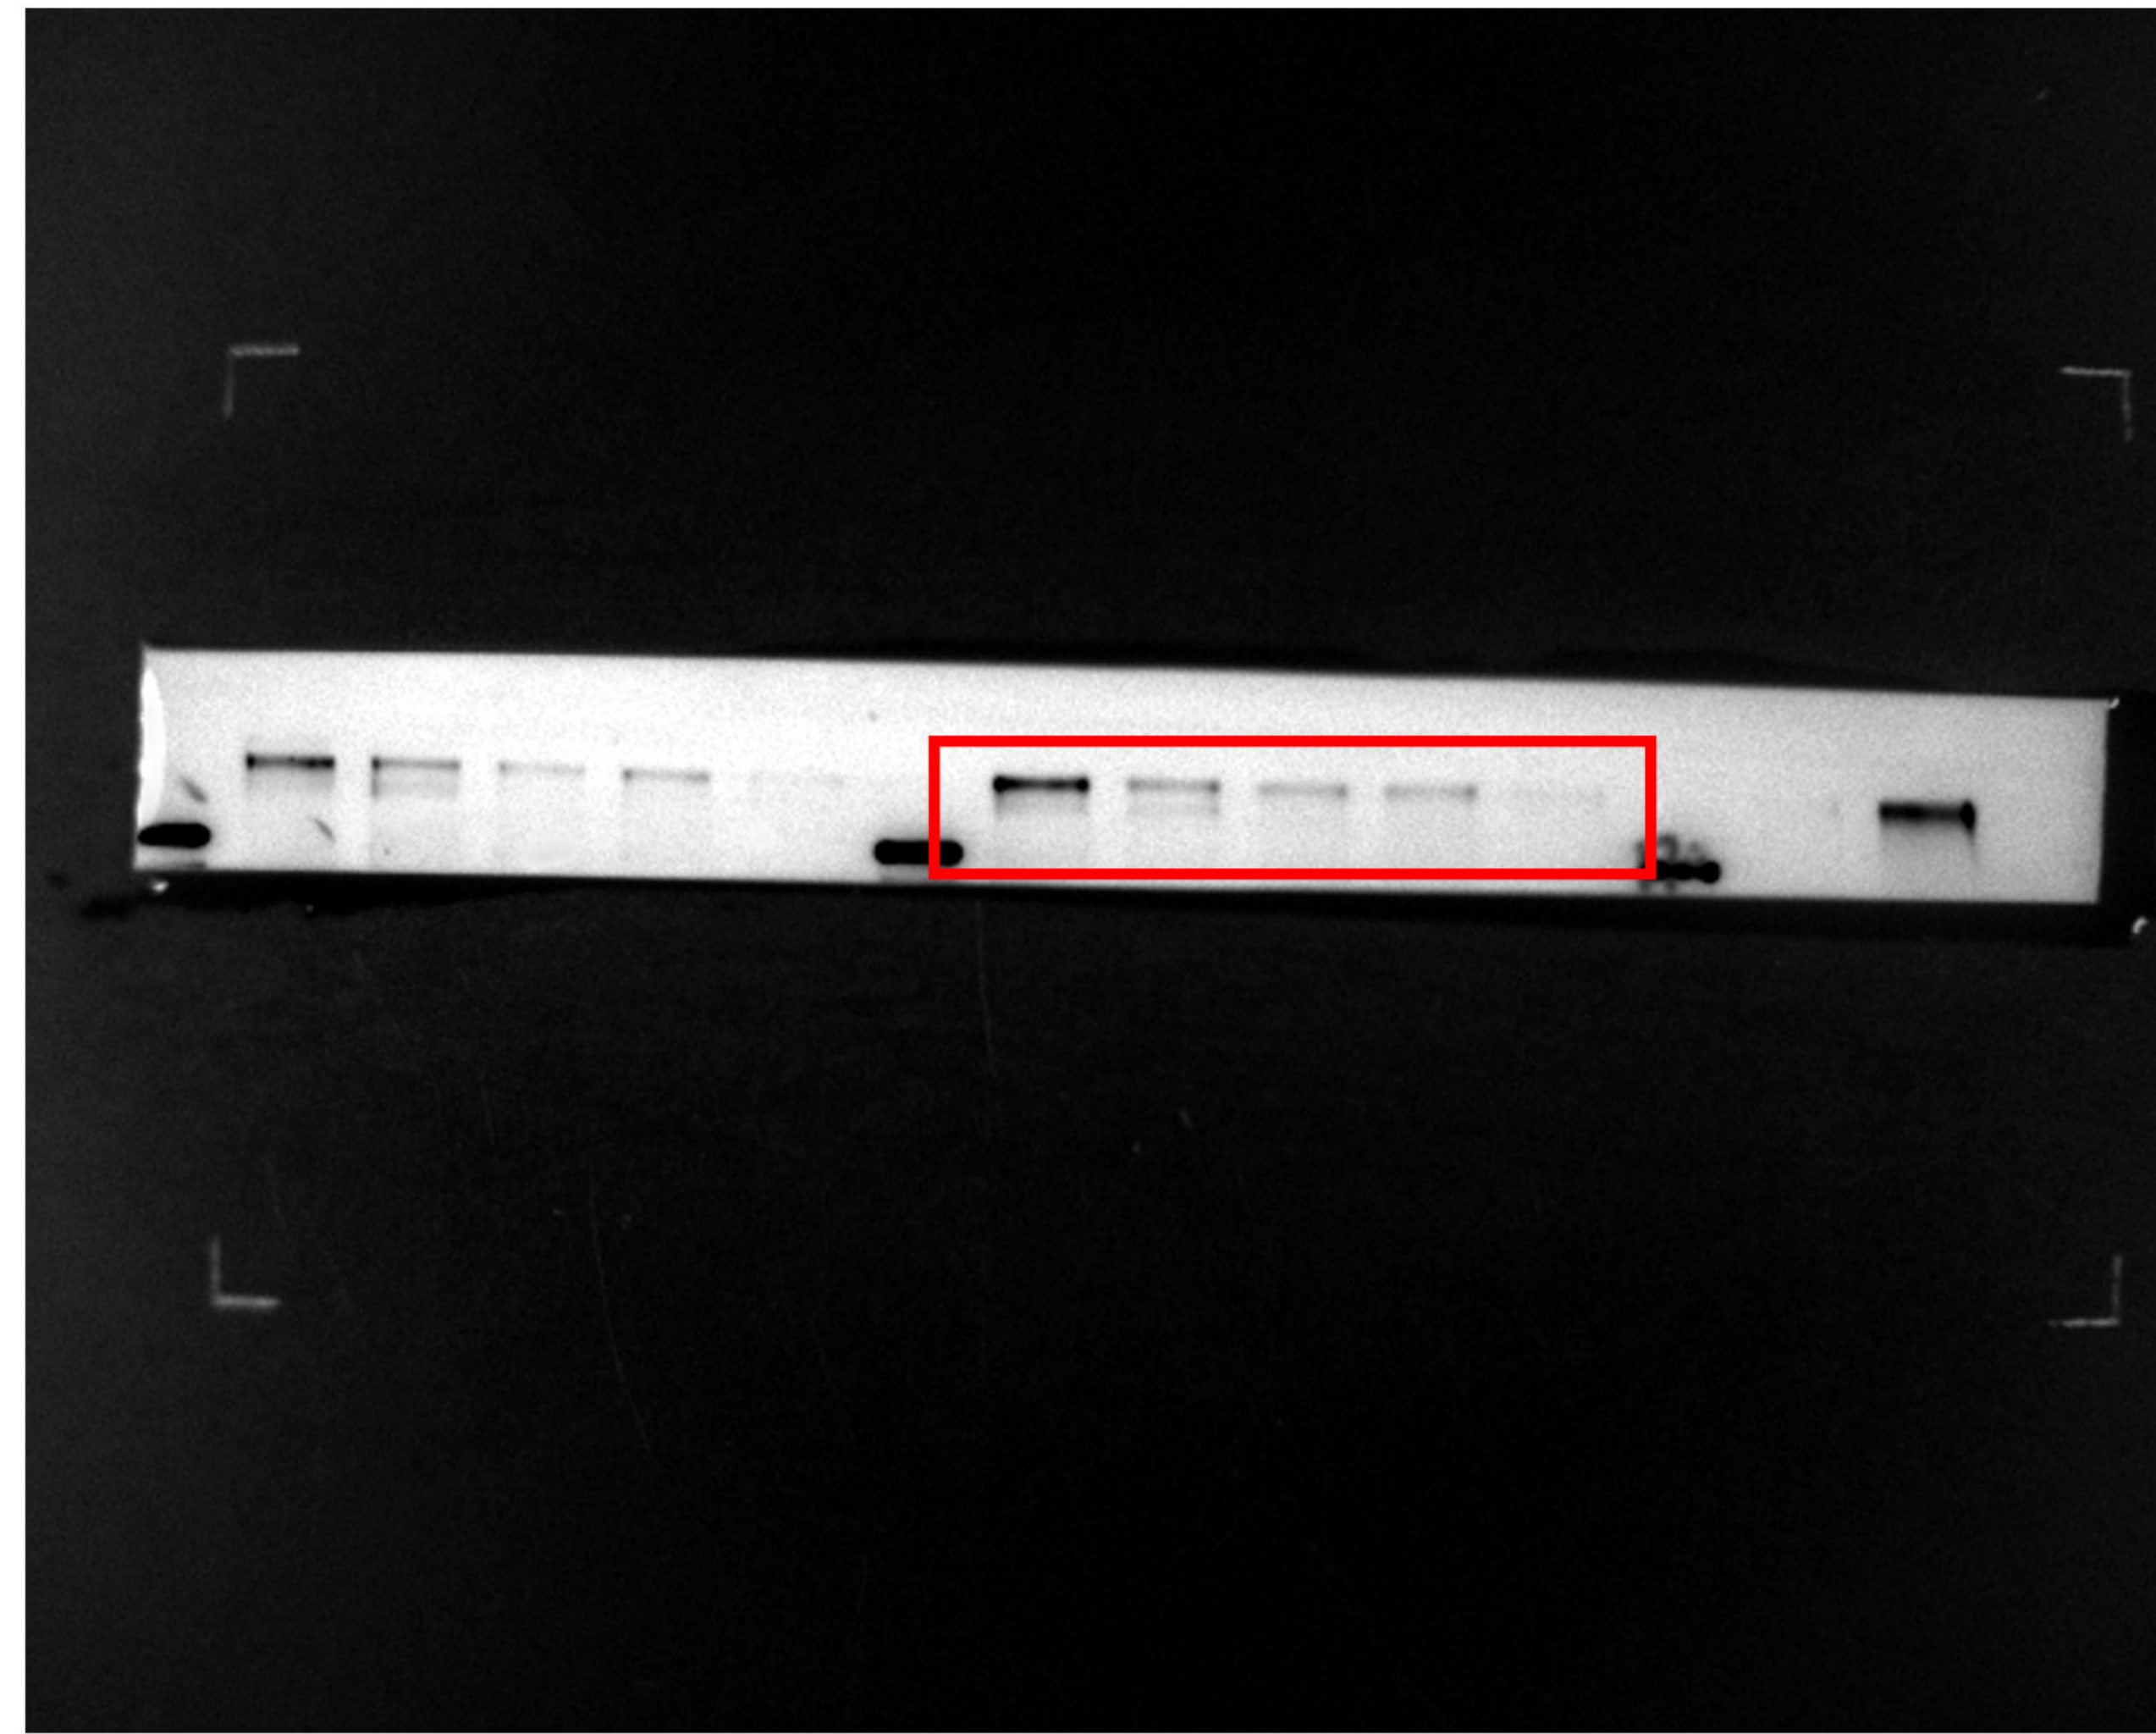

**ABCA1**

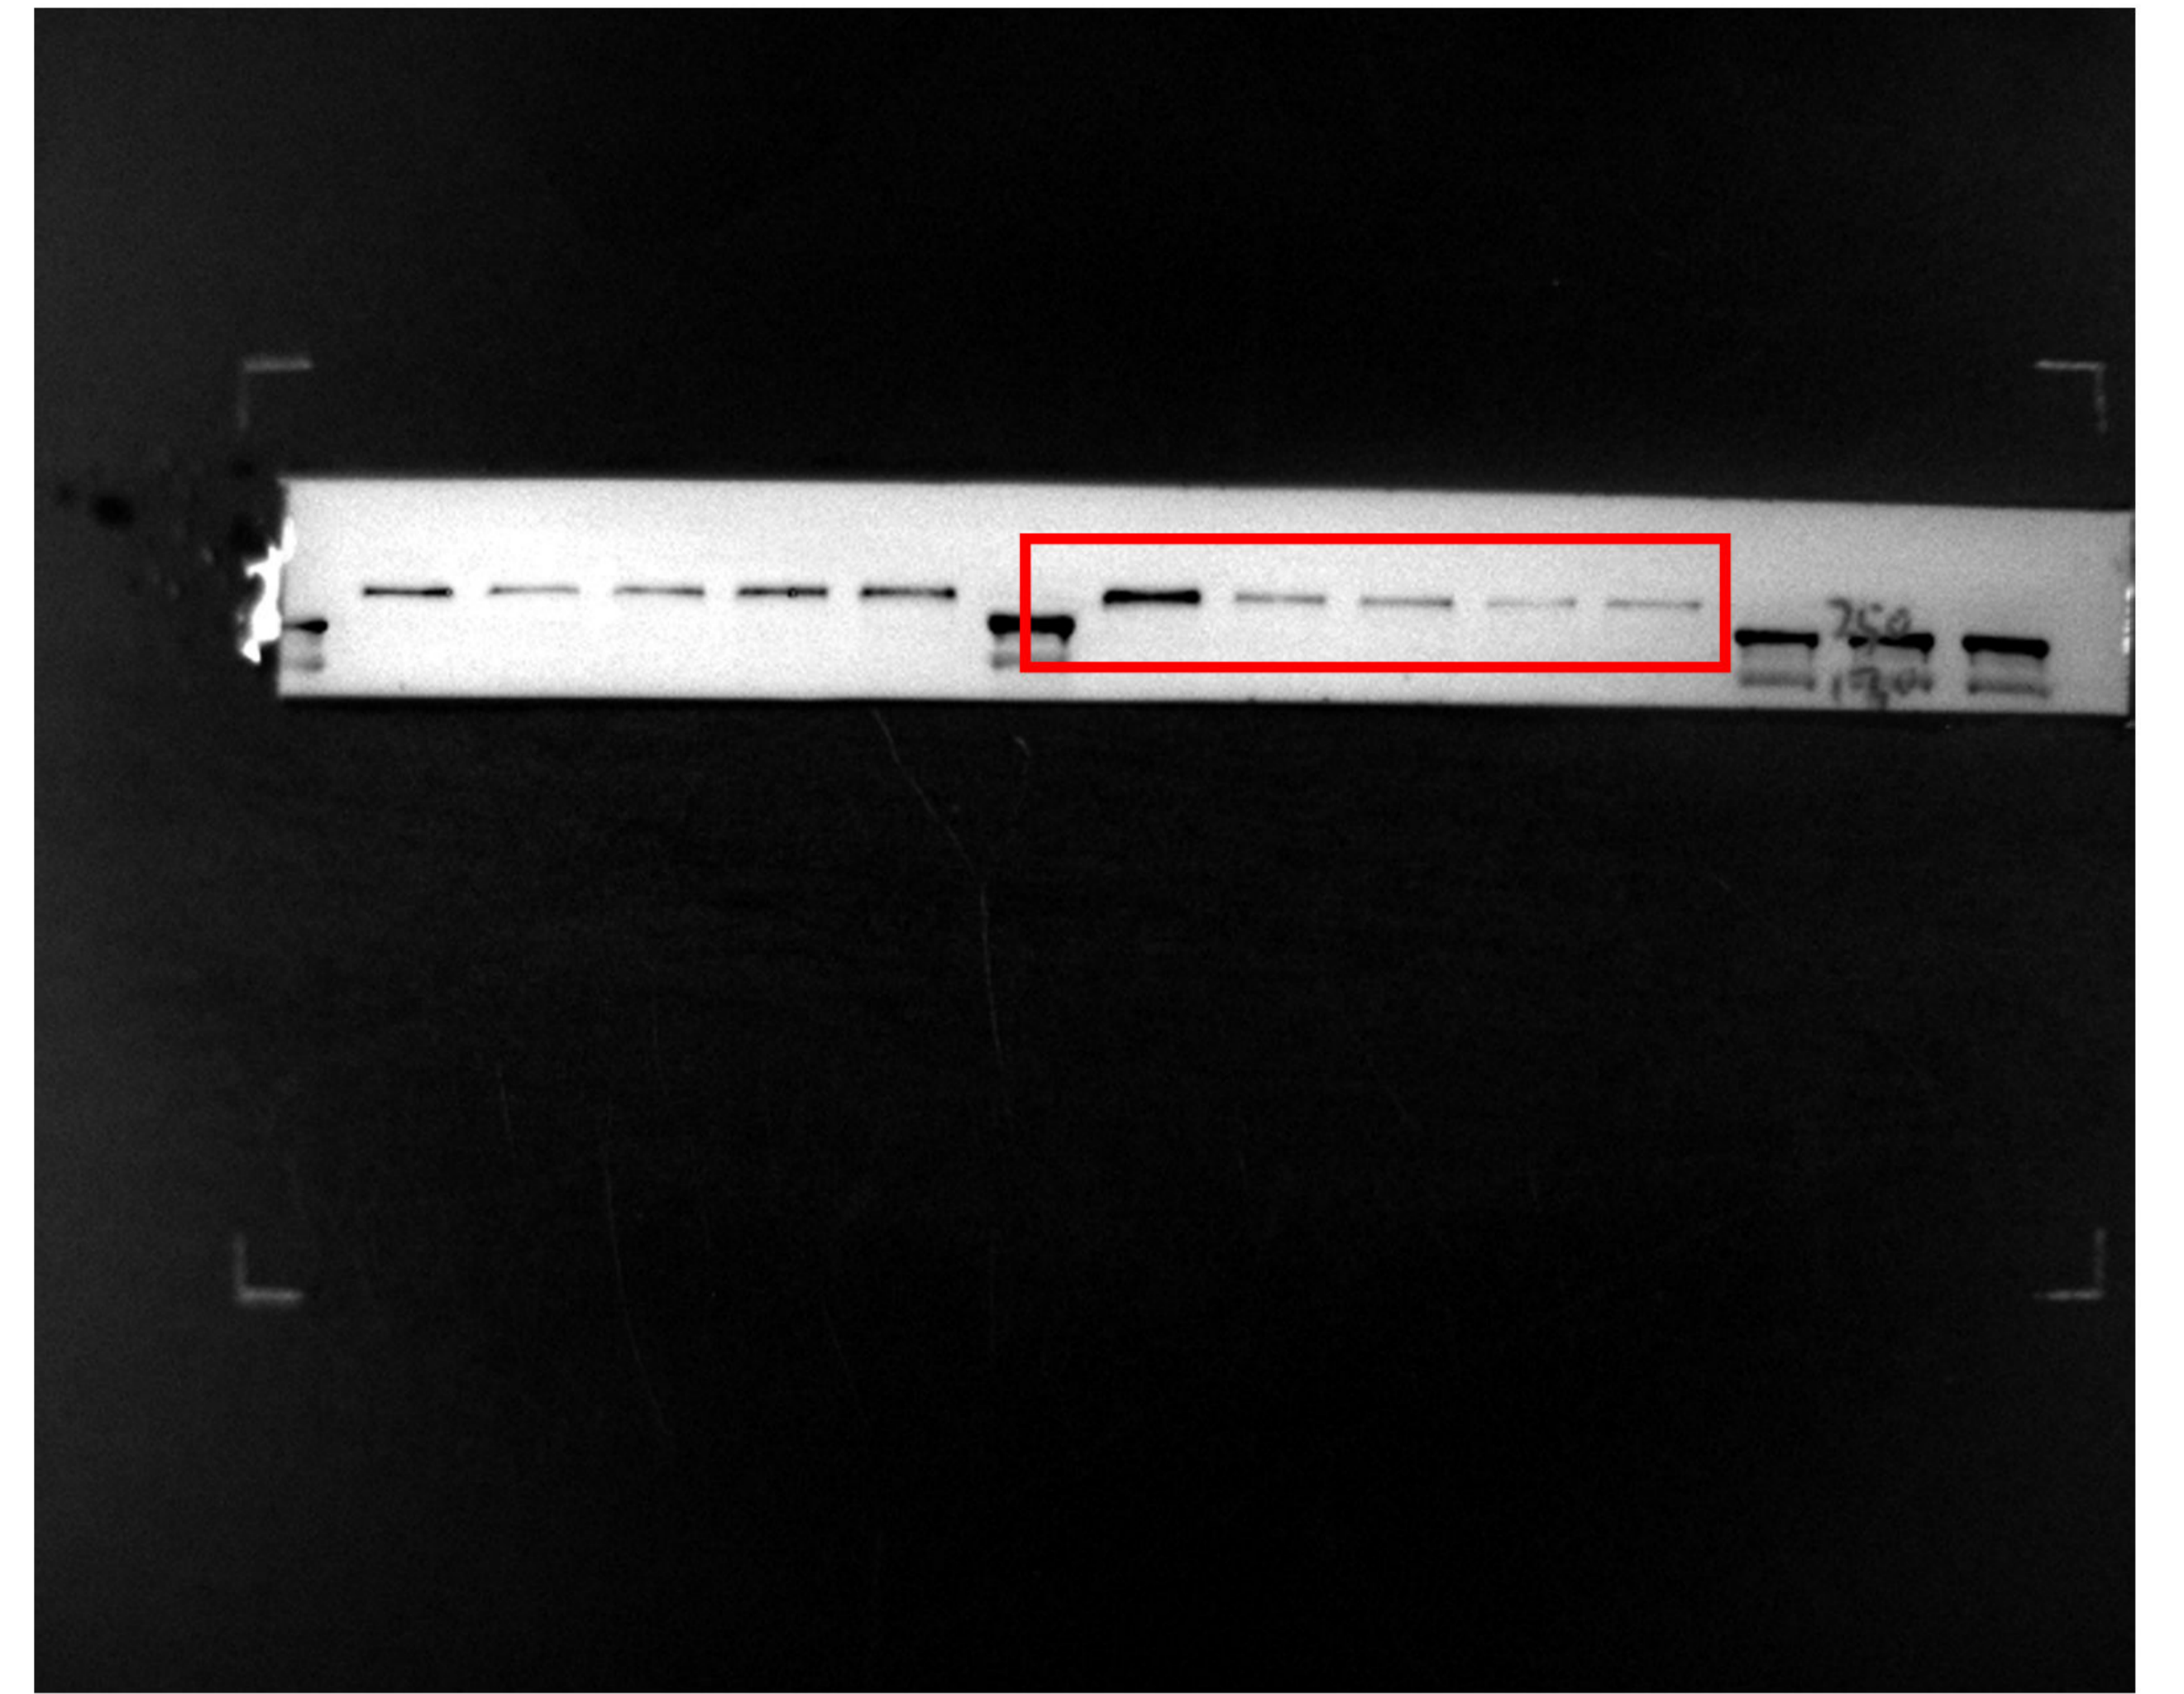

**ABCA1**

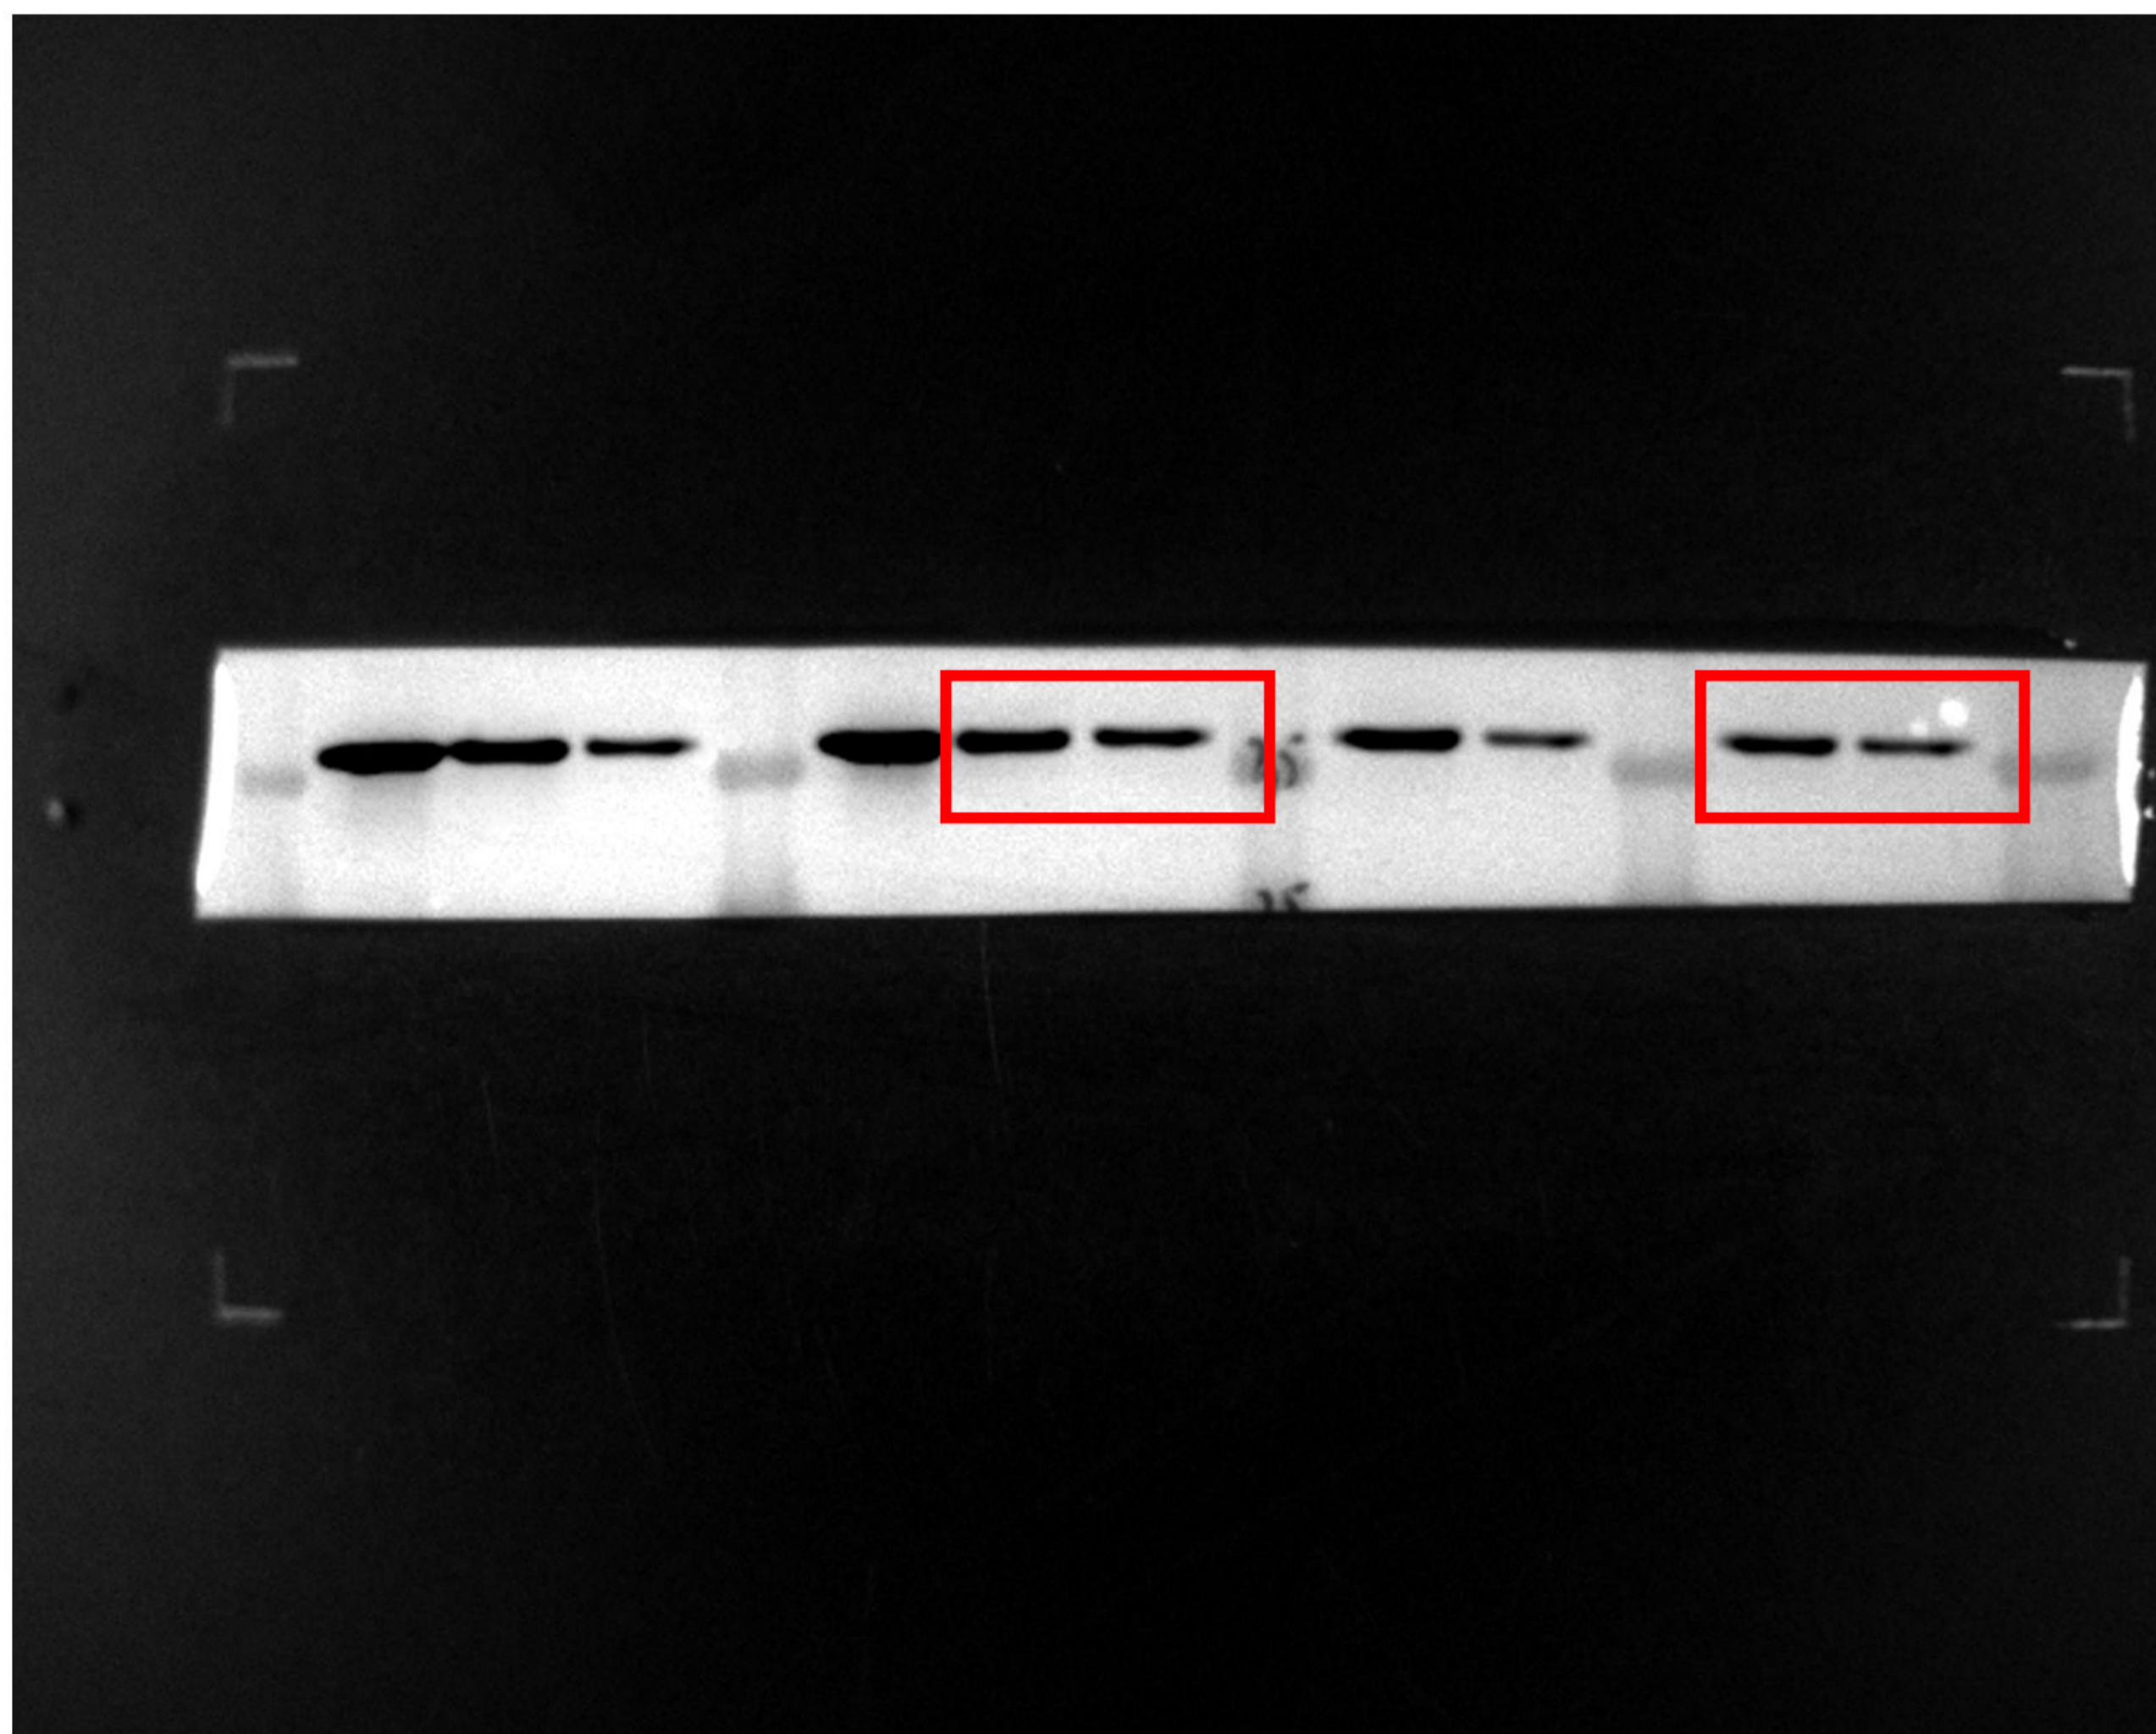

**GAPDH**

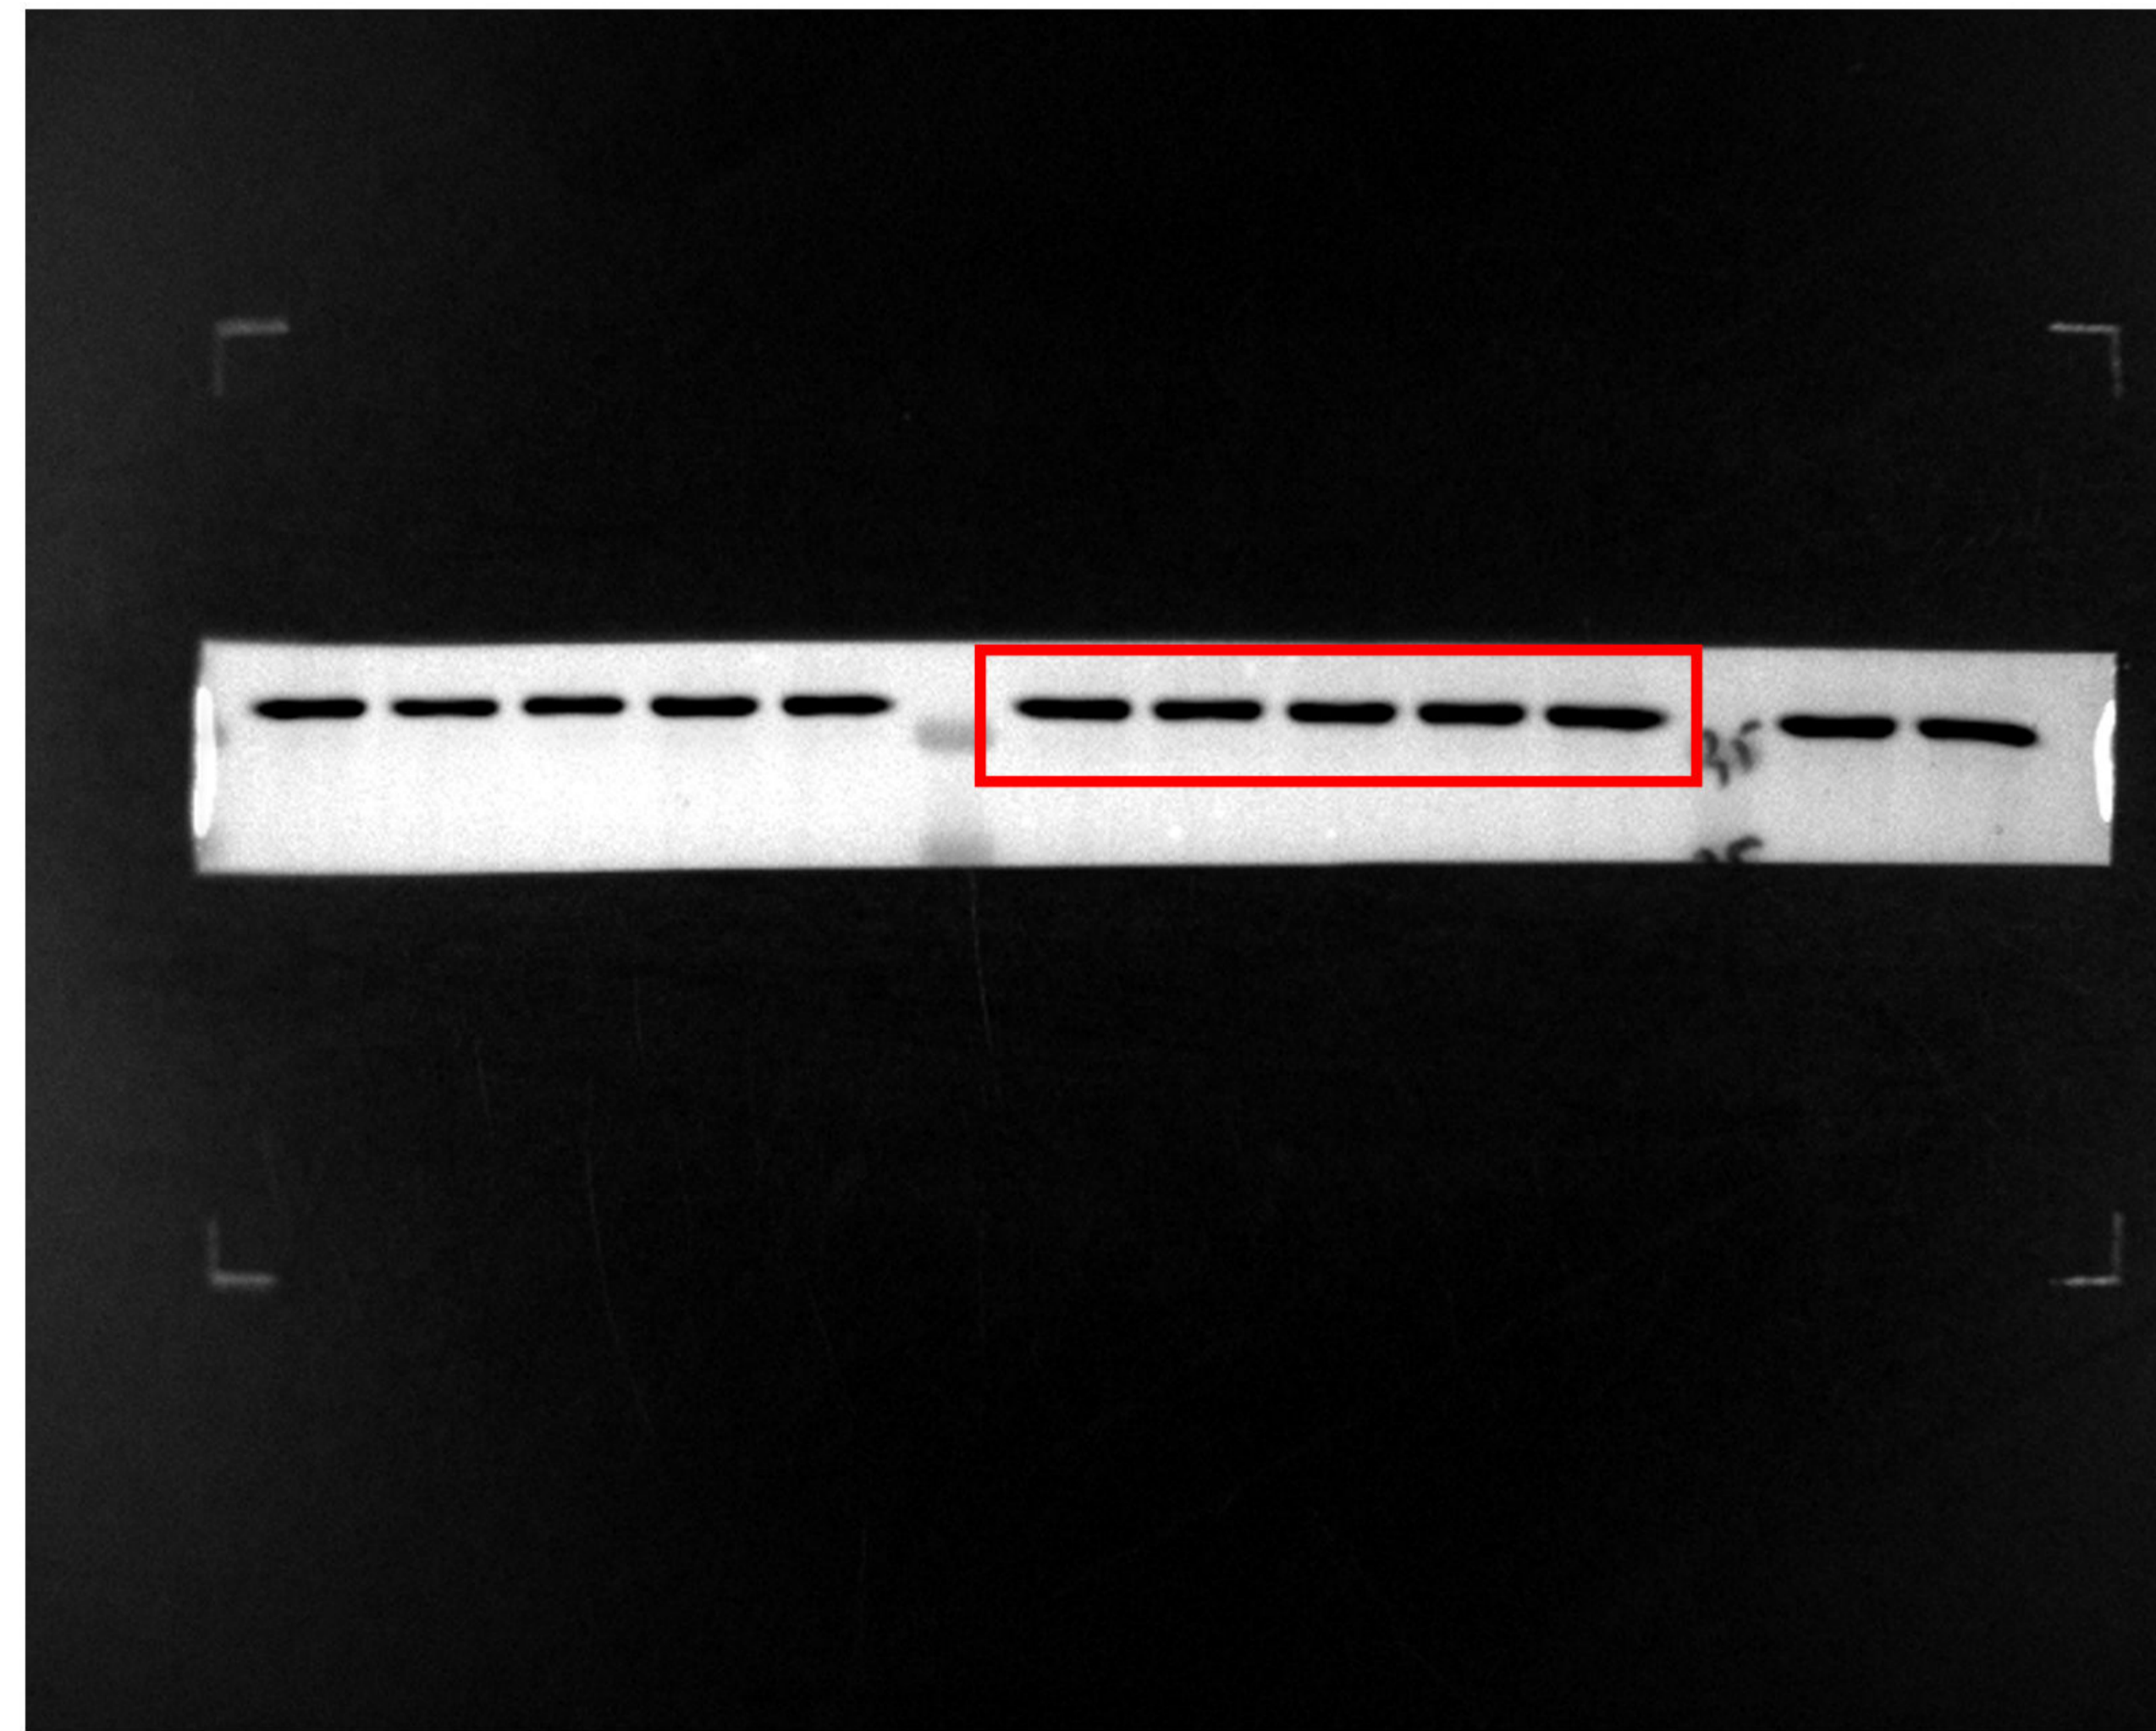

**GAPDH**

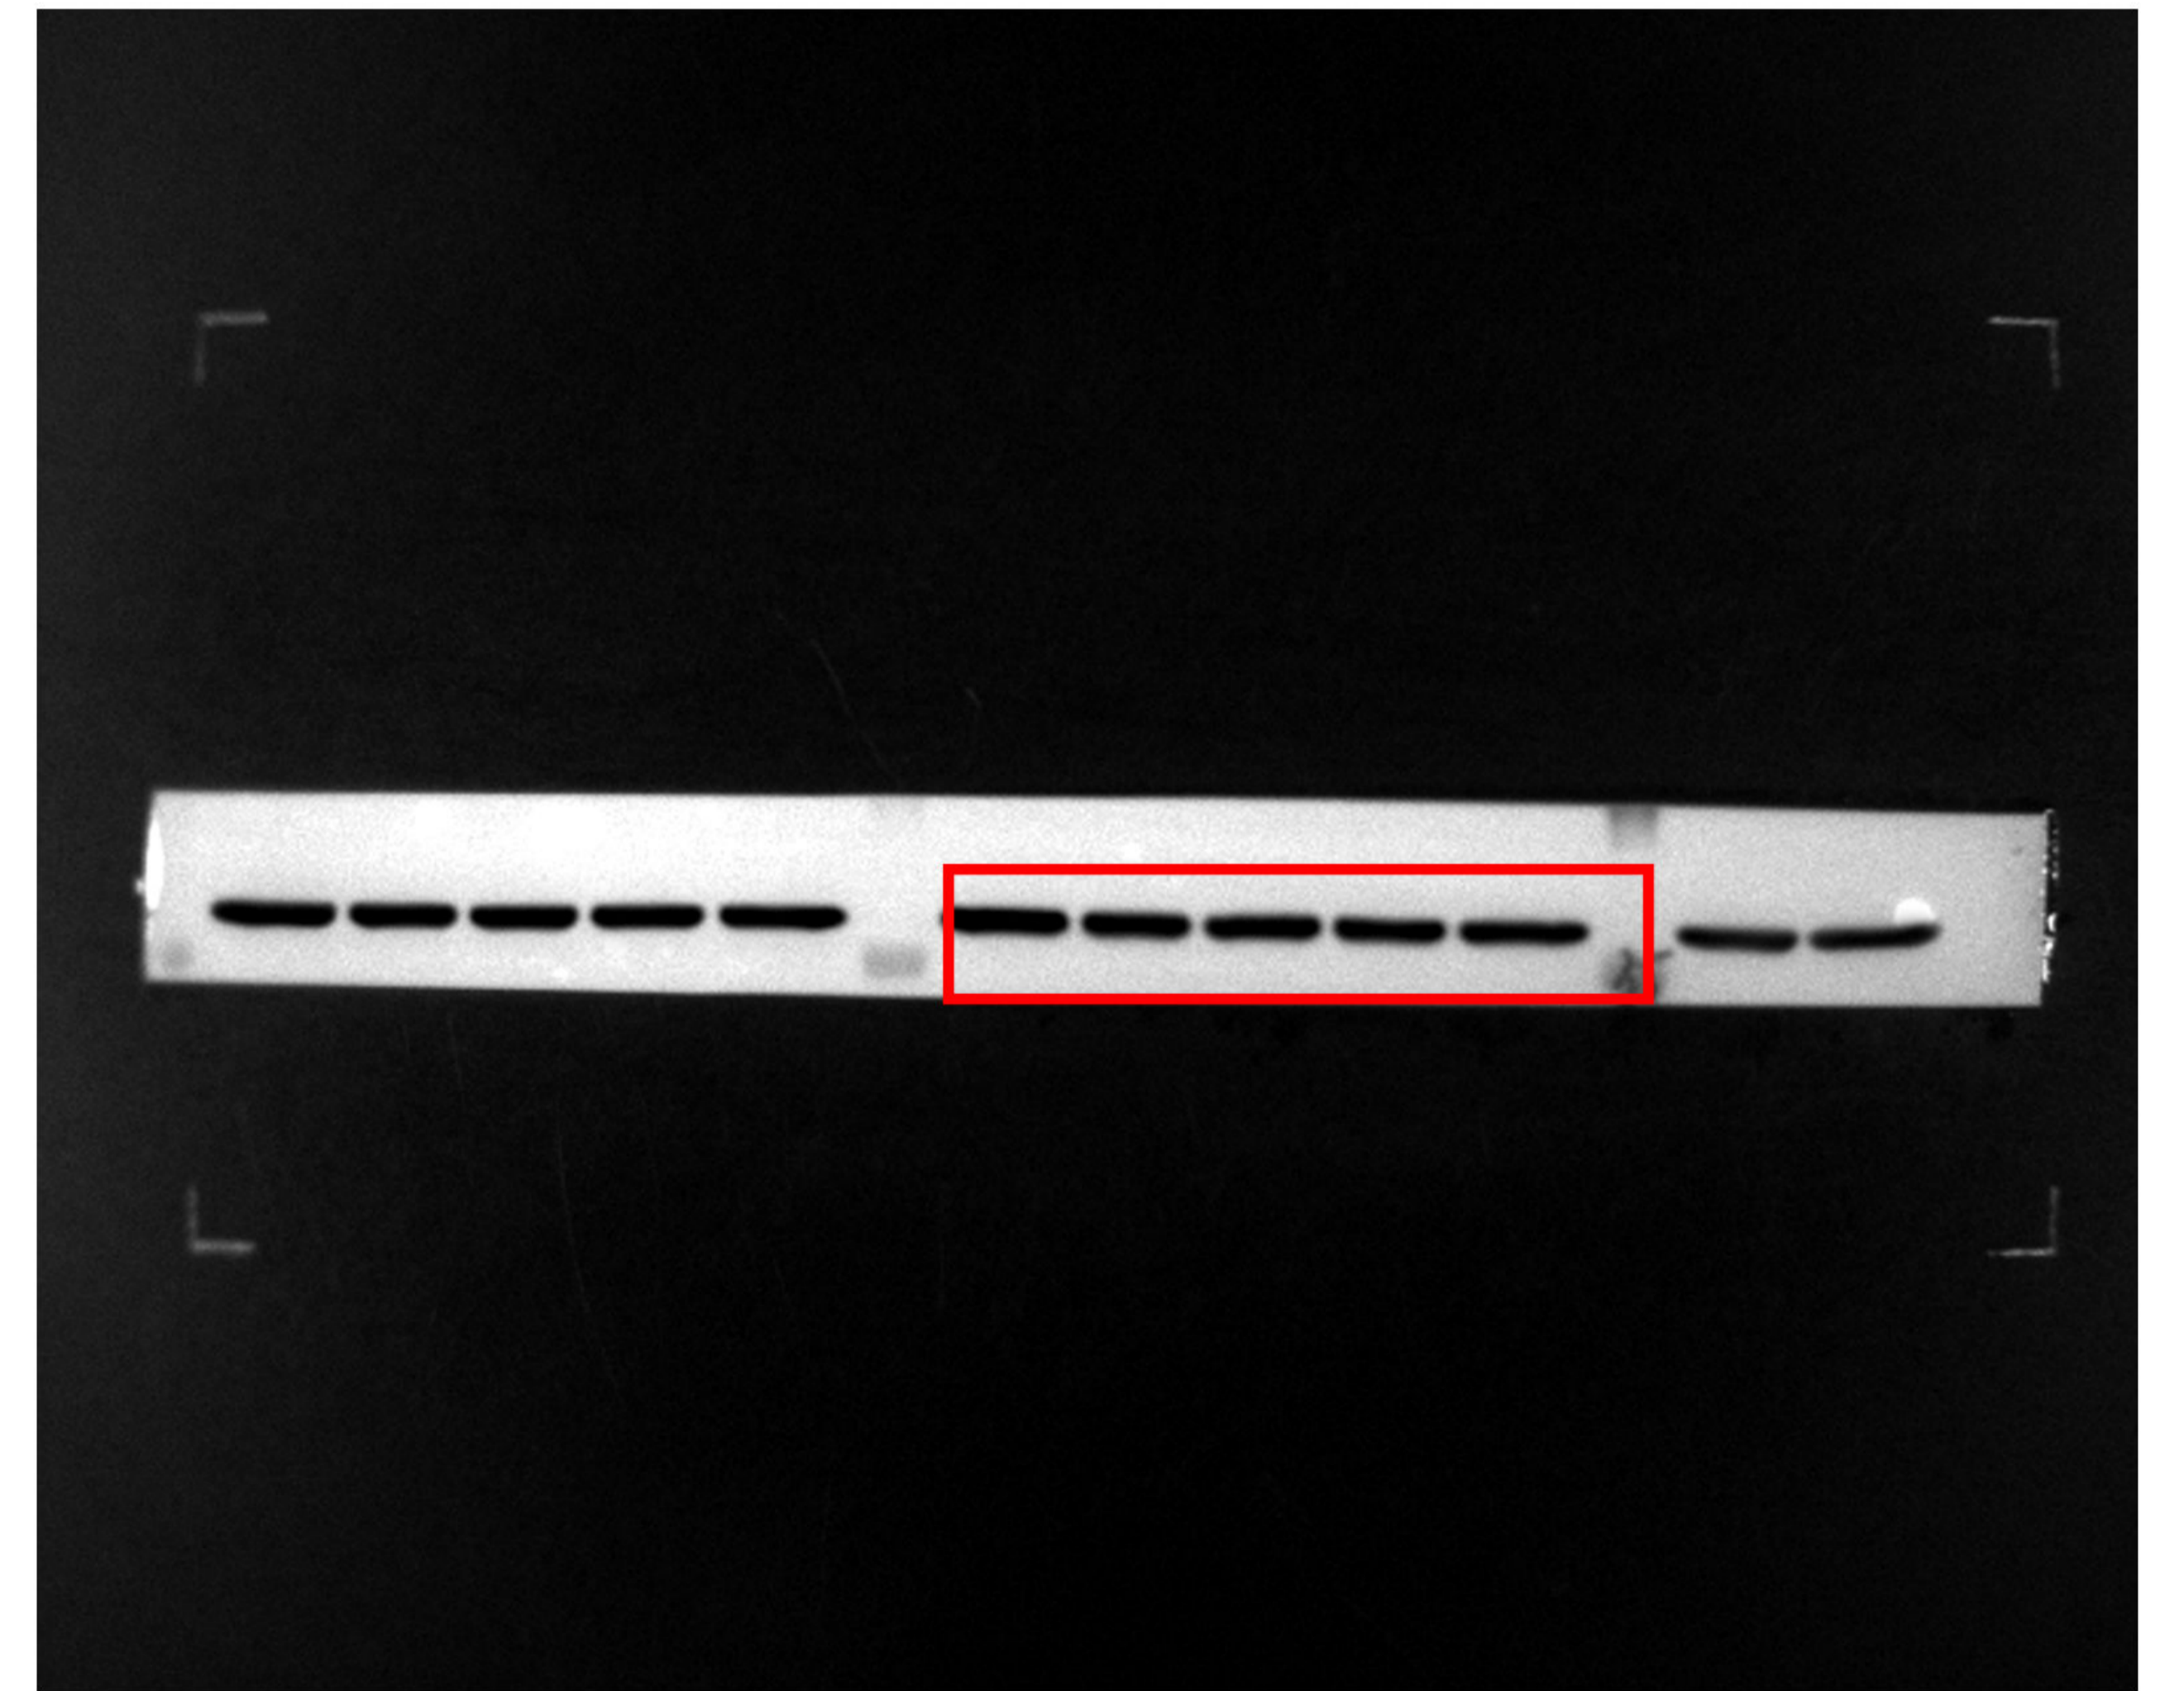

**GAPDH**



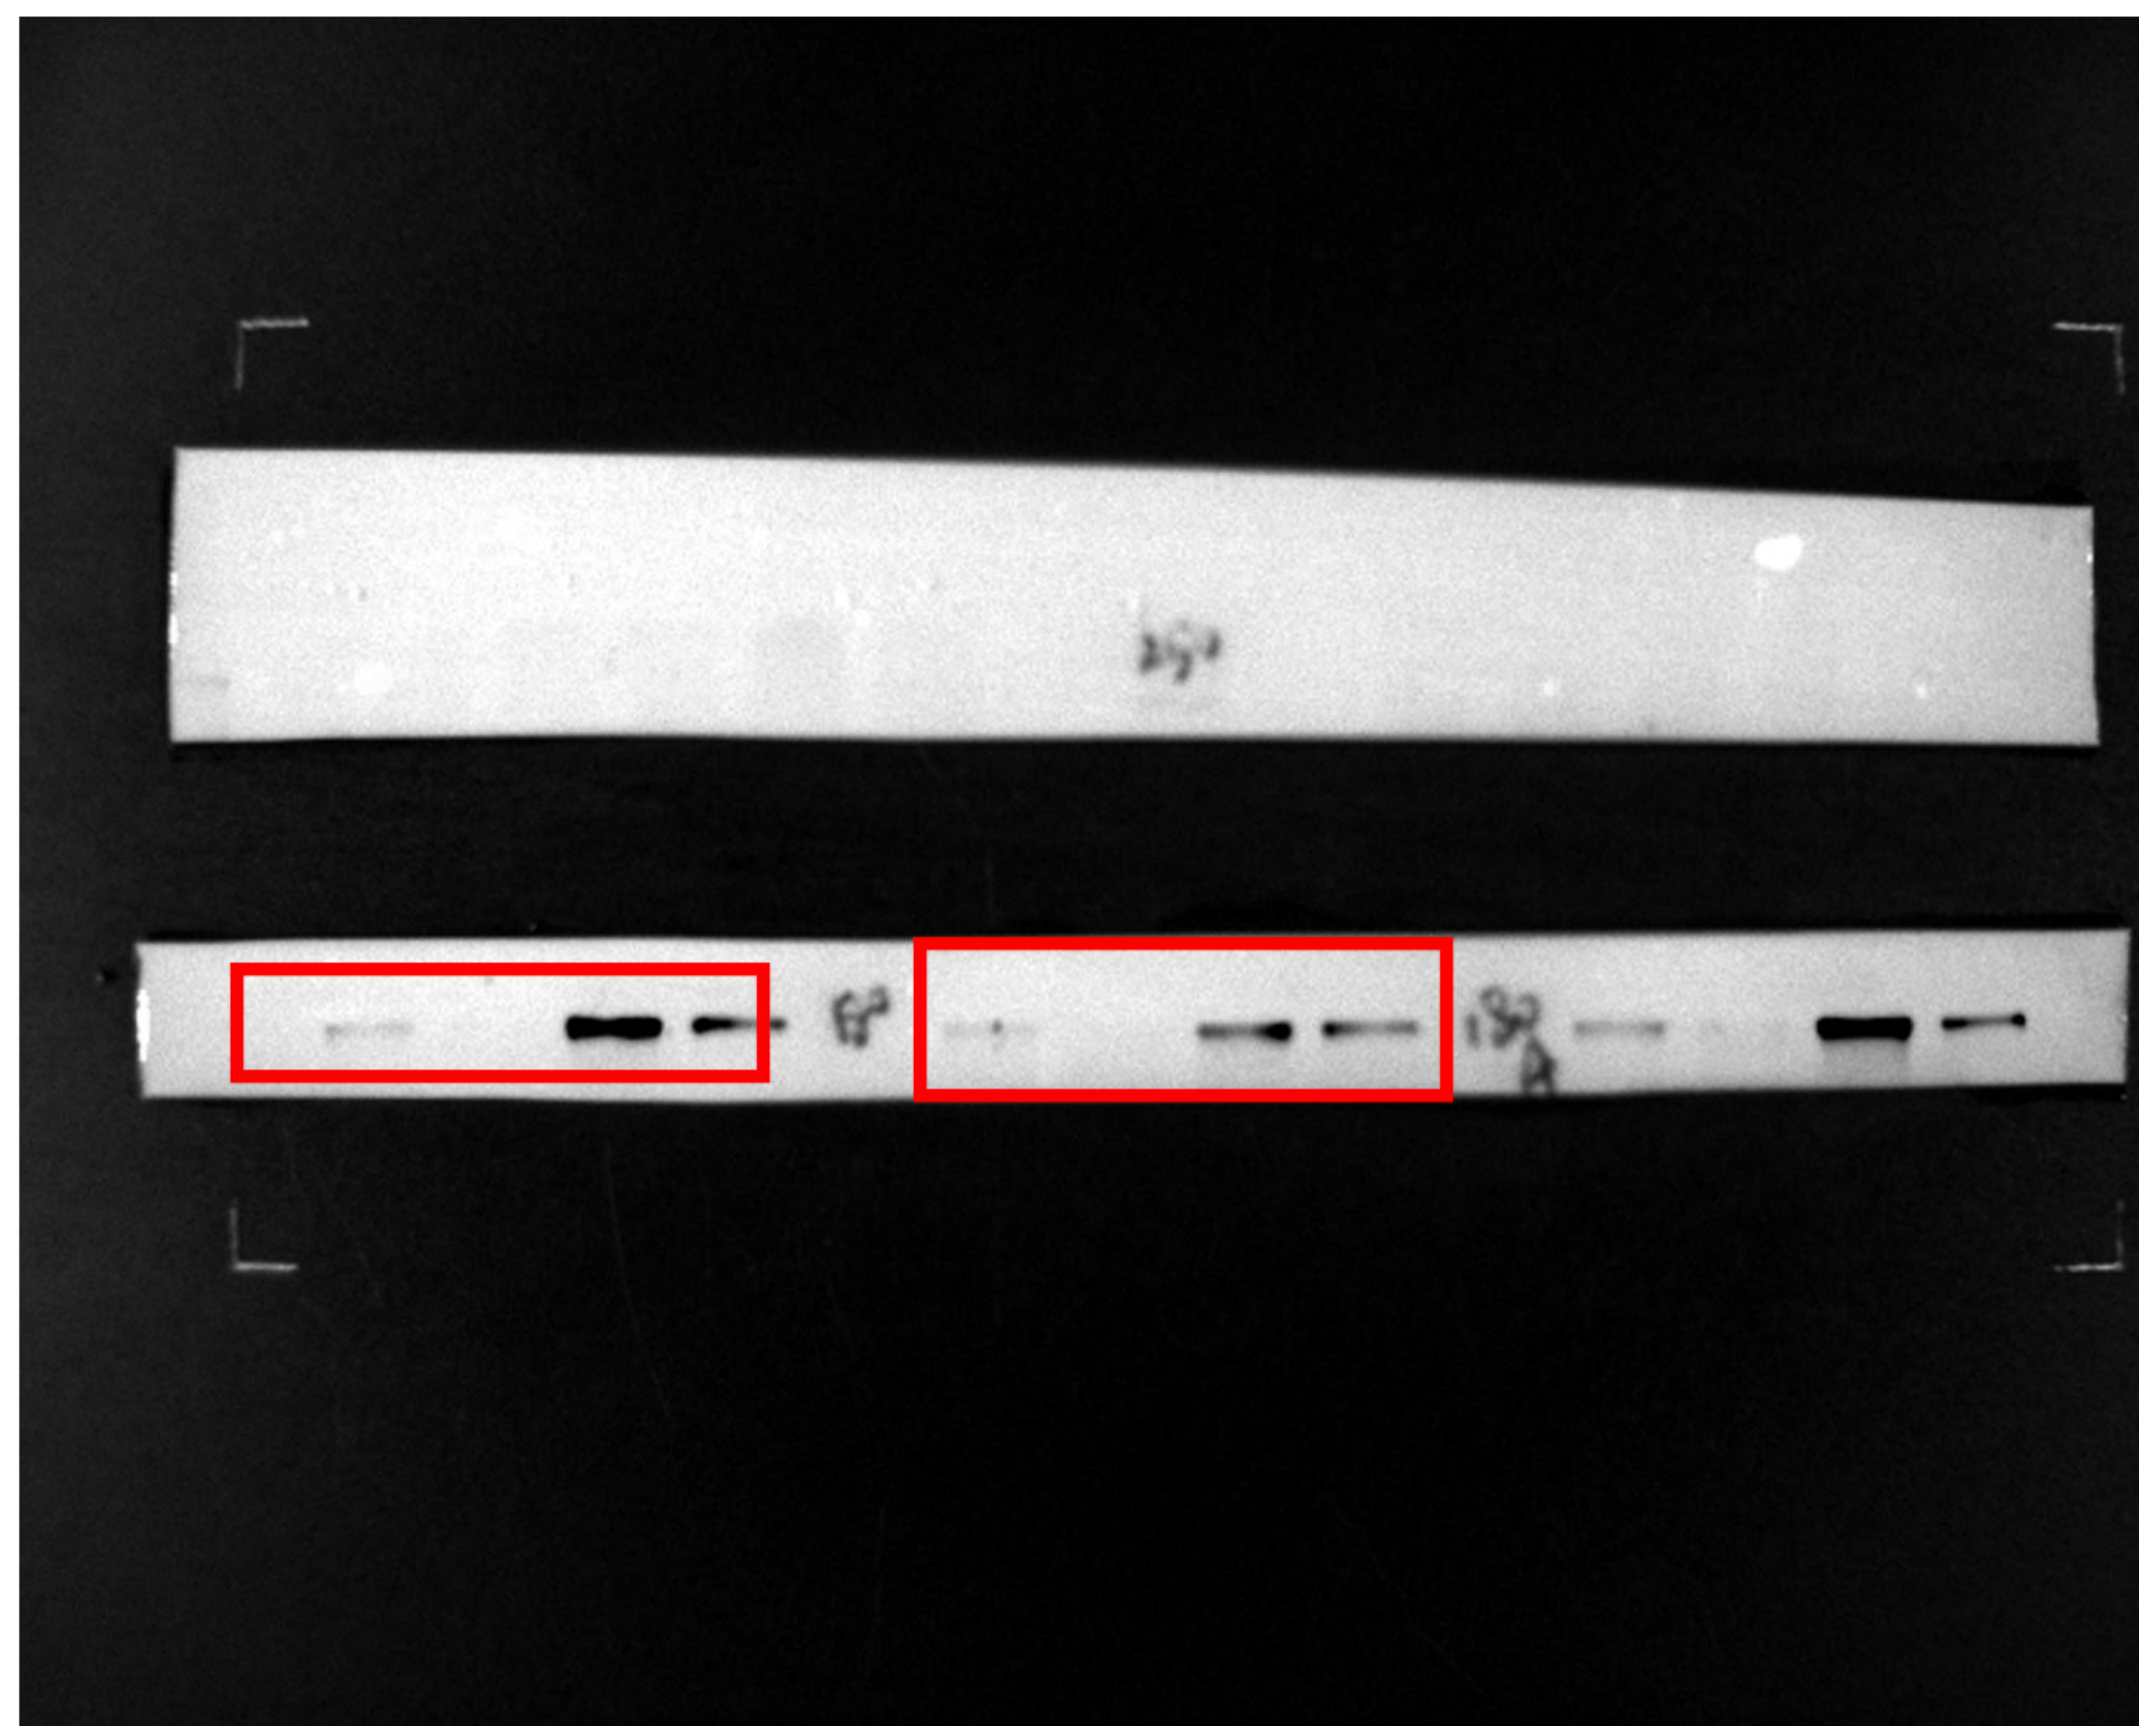

**ABCA1**

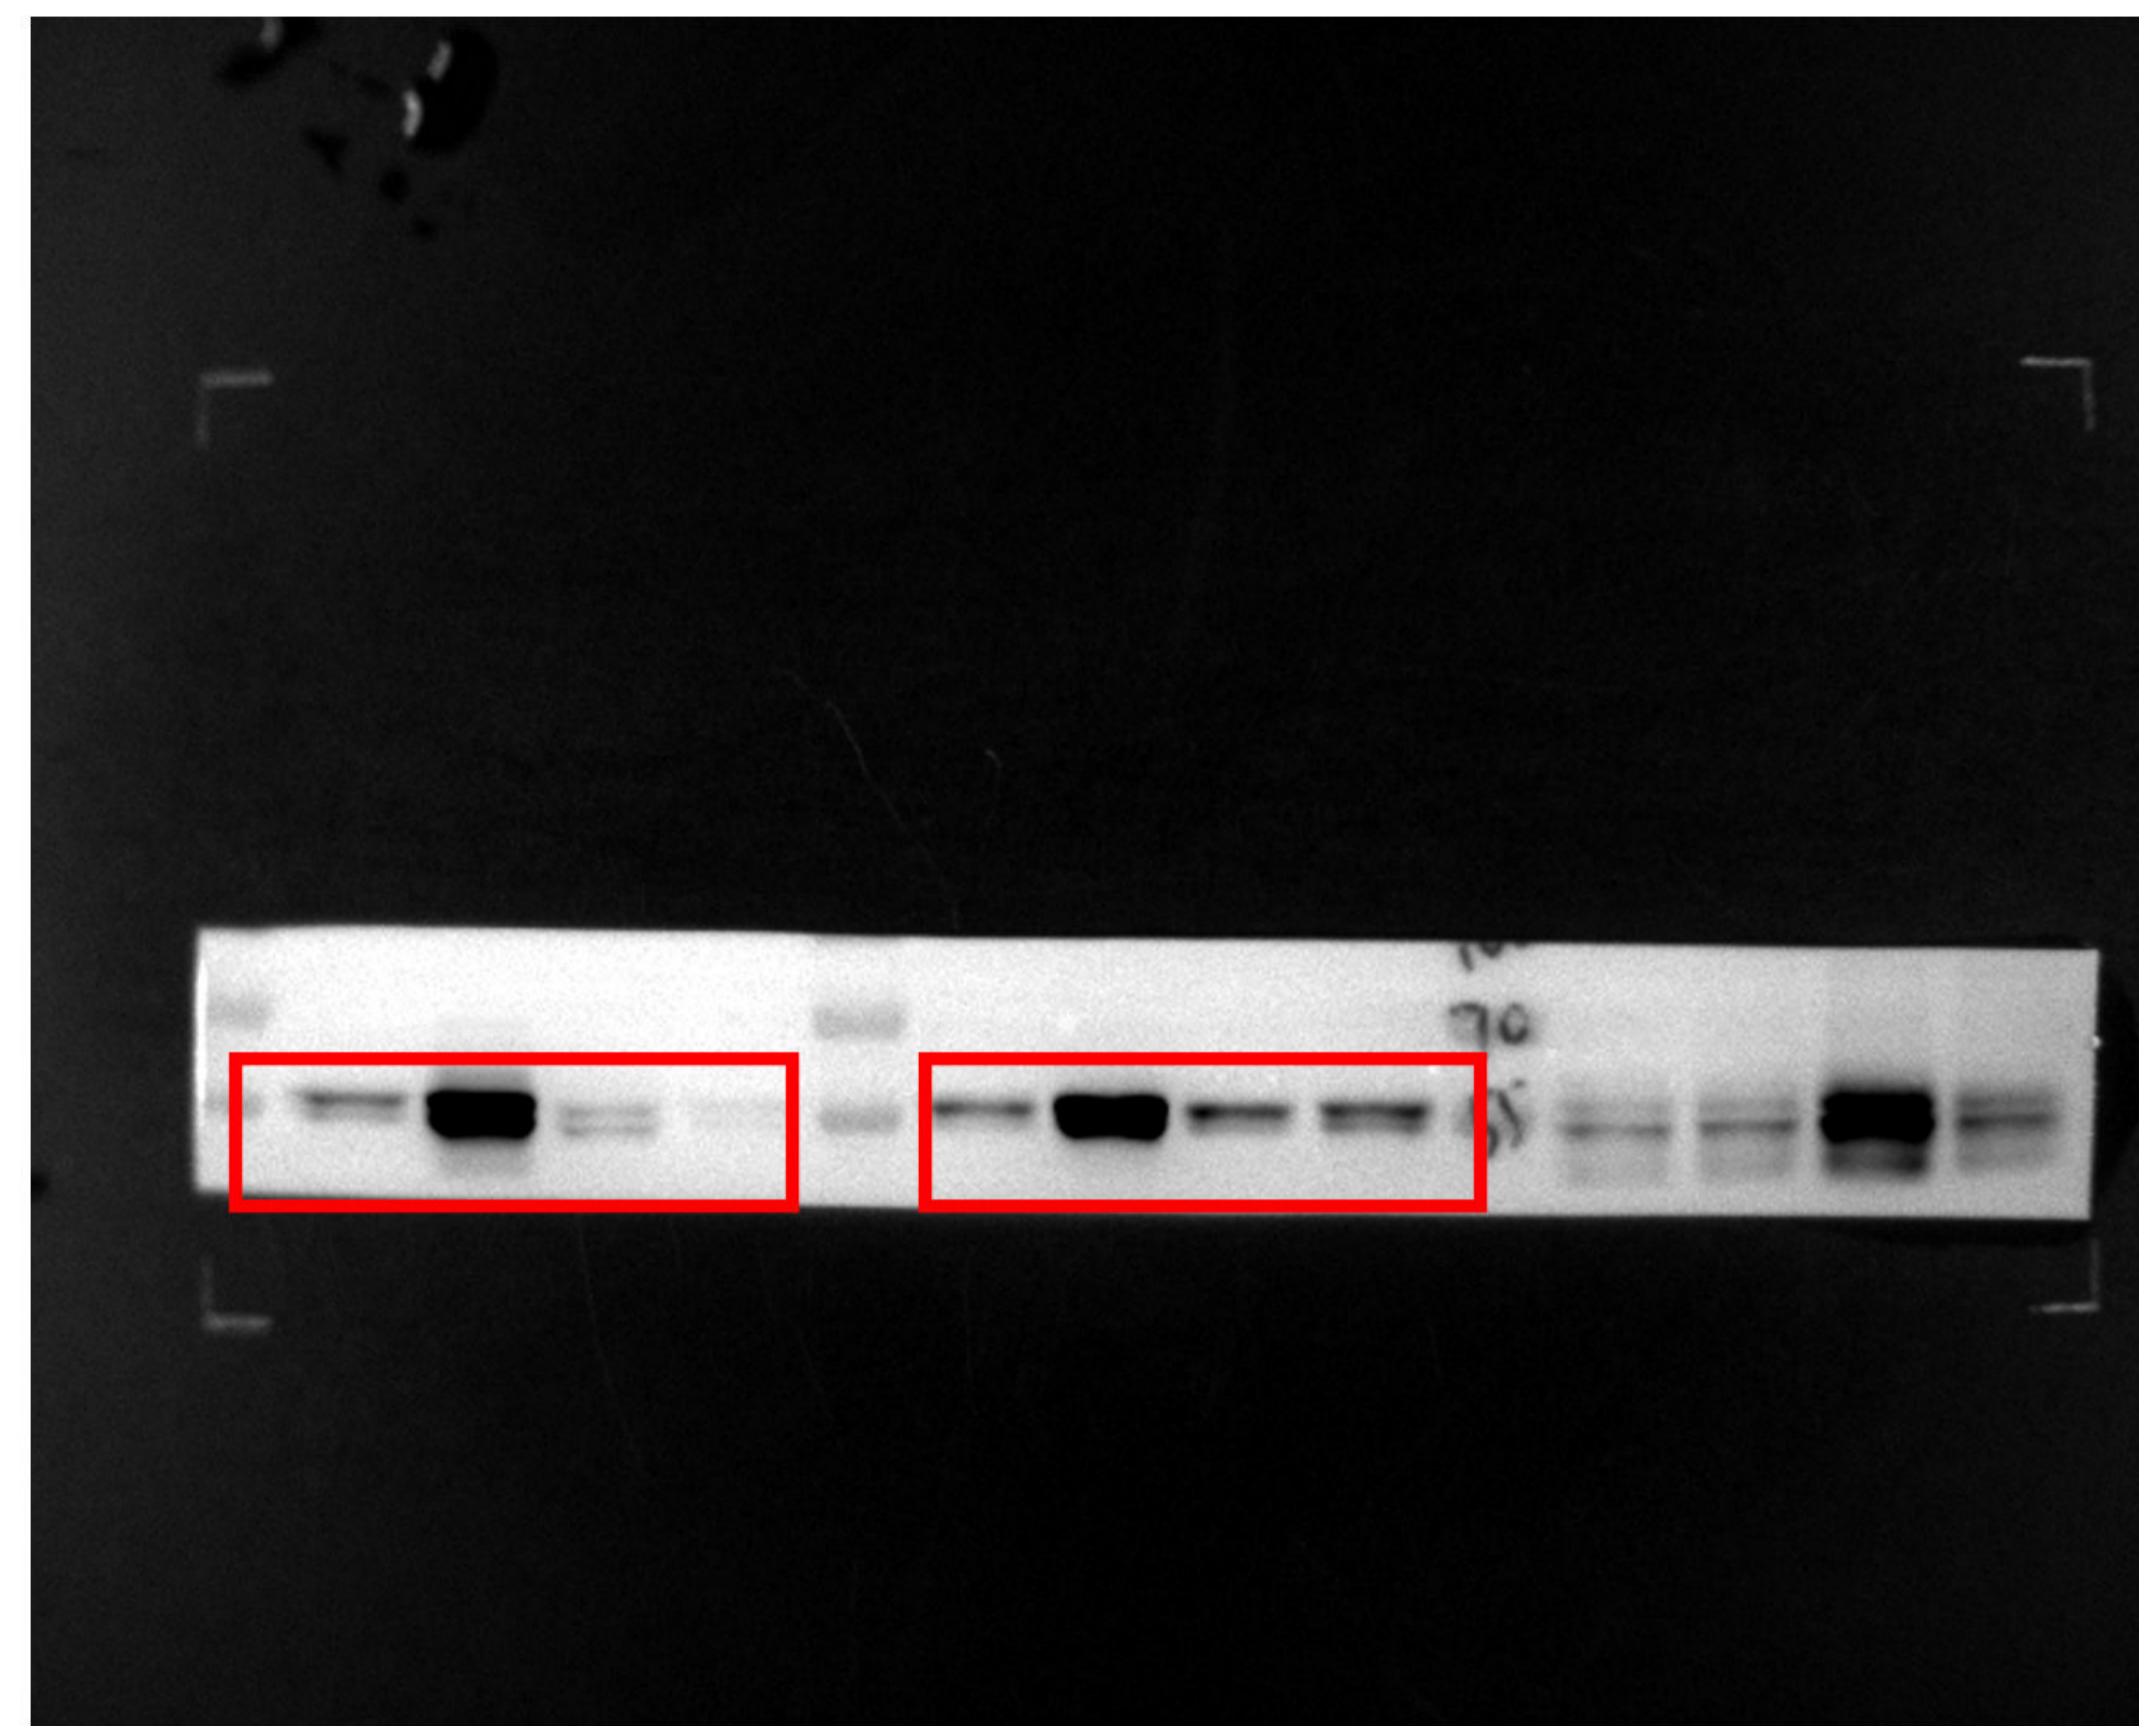

**HMGCS1**

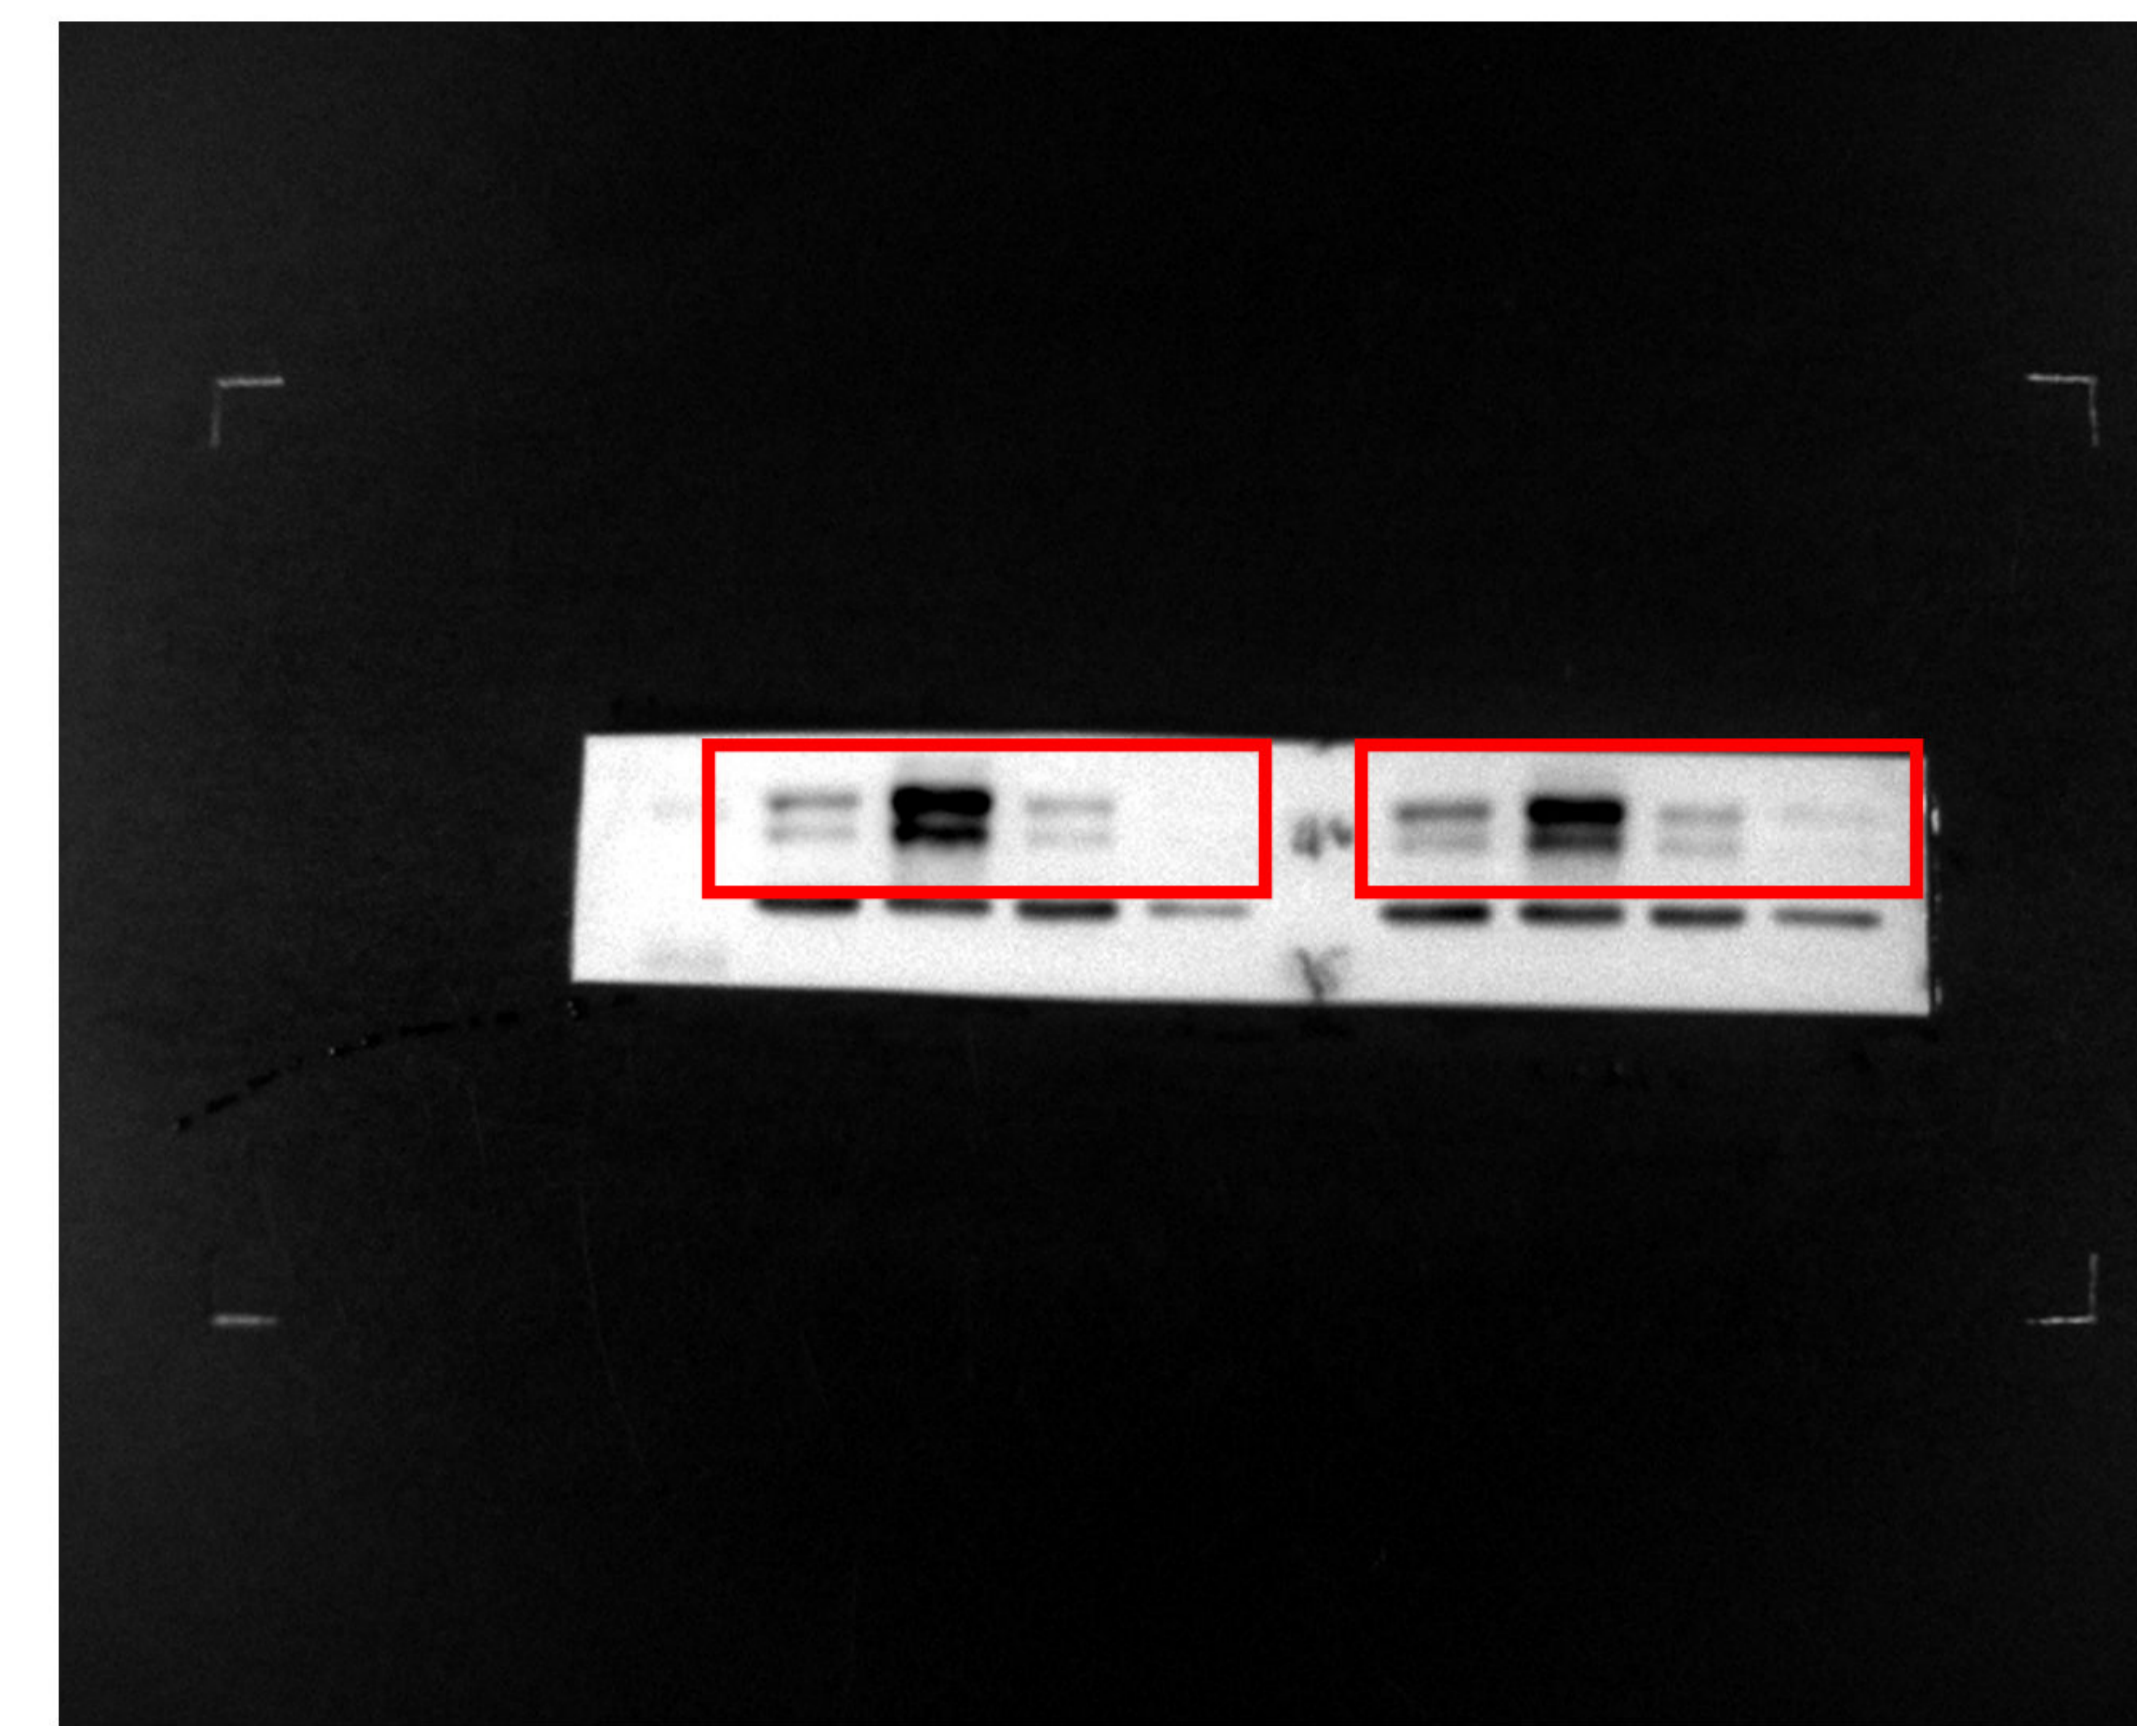

**MVK**

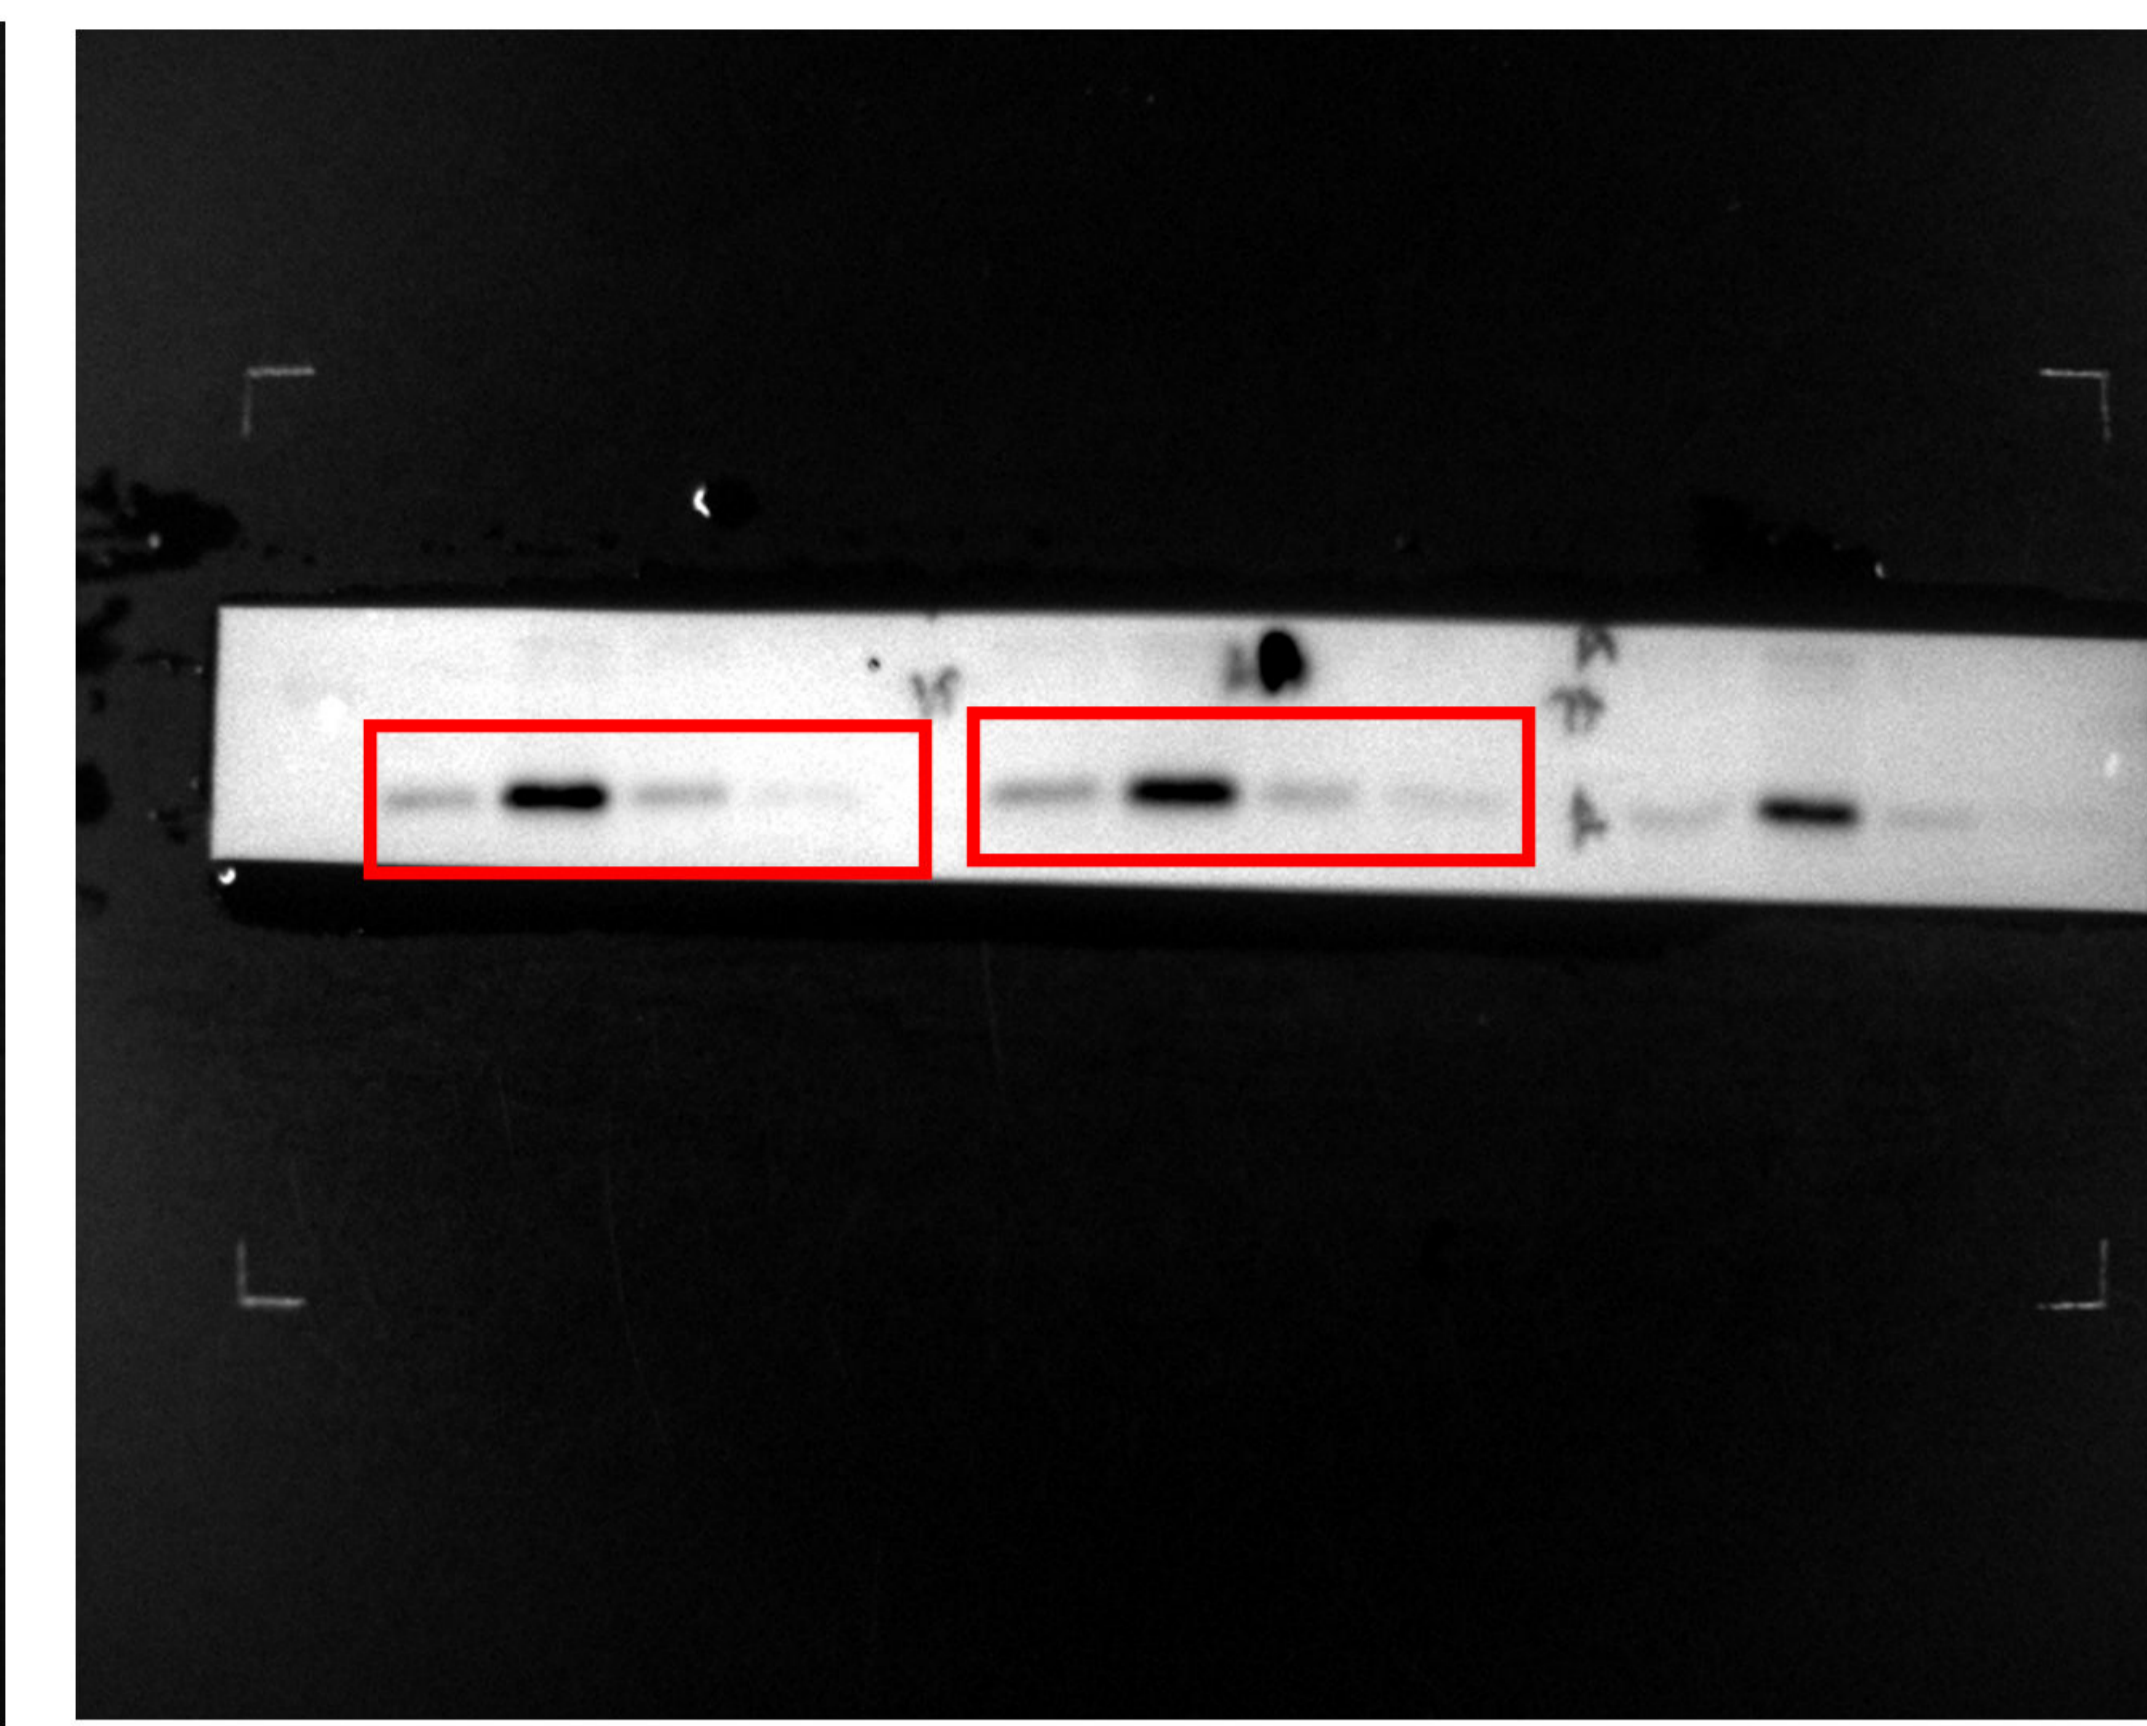

**IDI1**

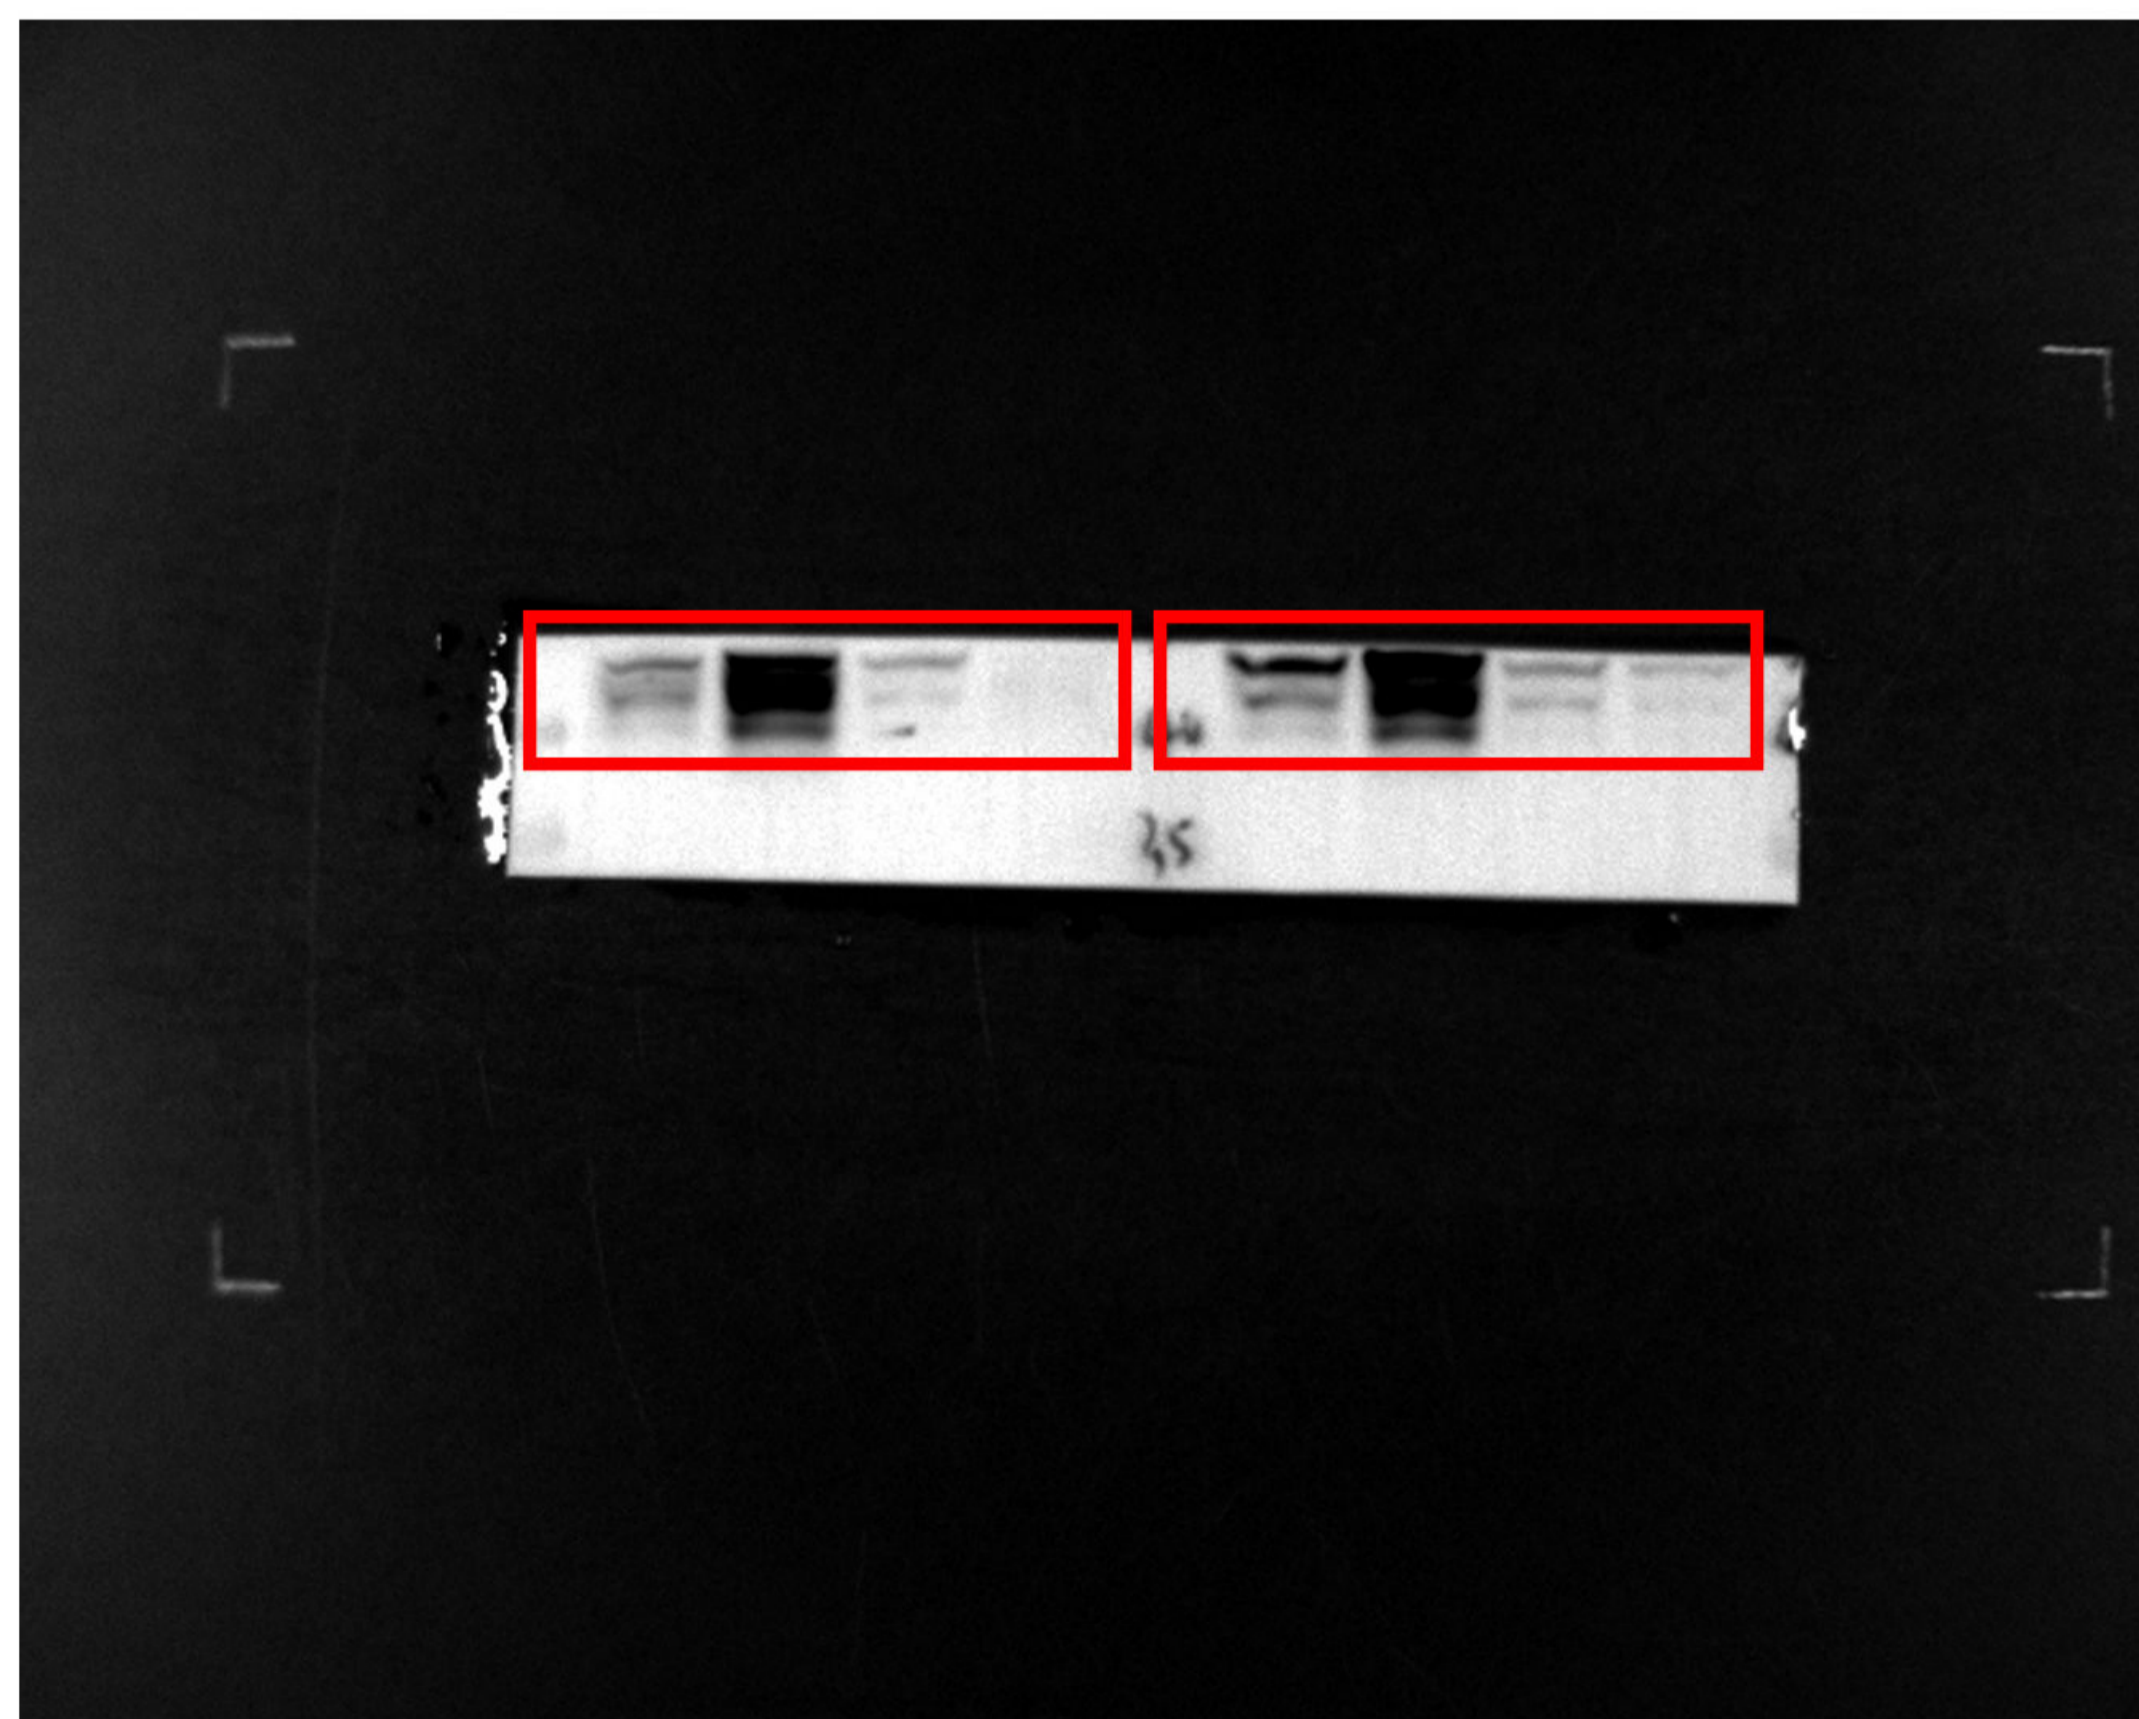

**FDFT1**

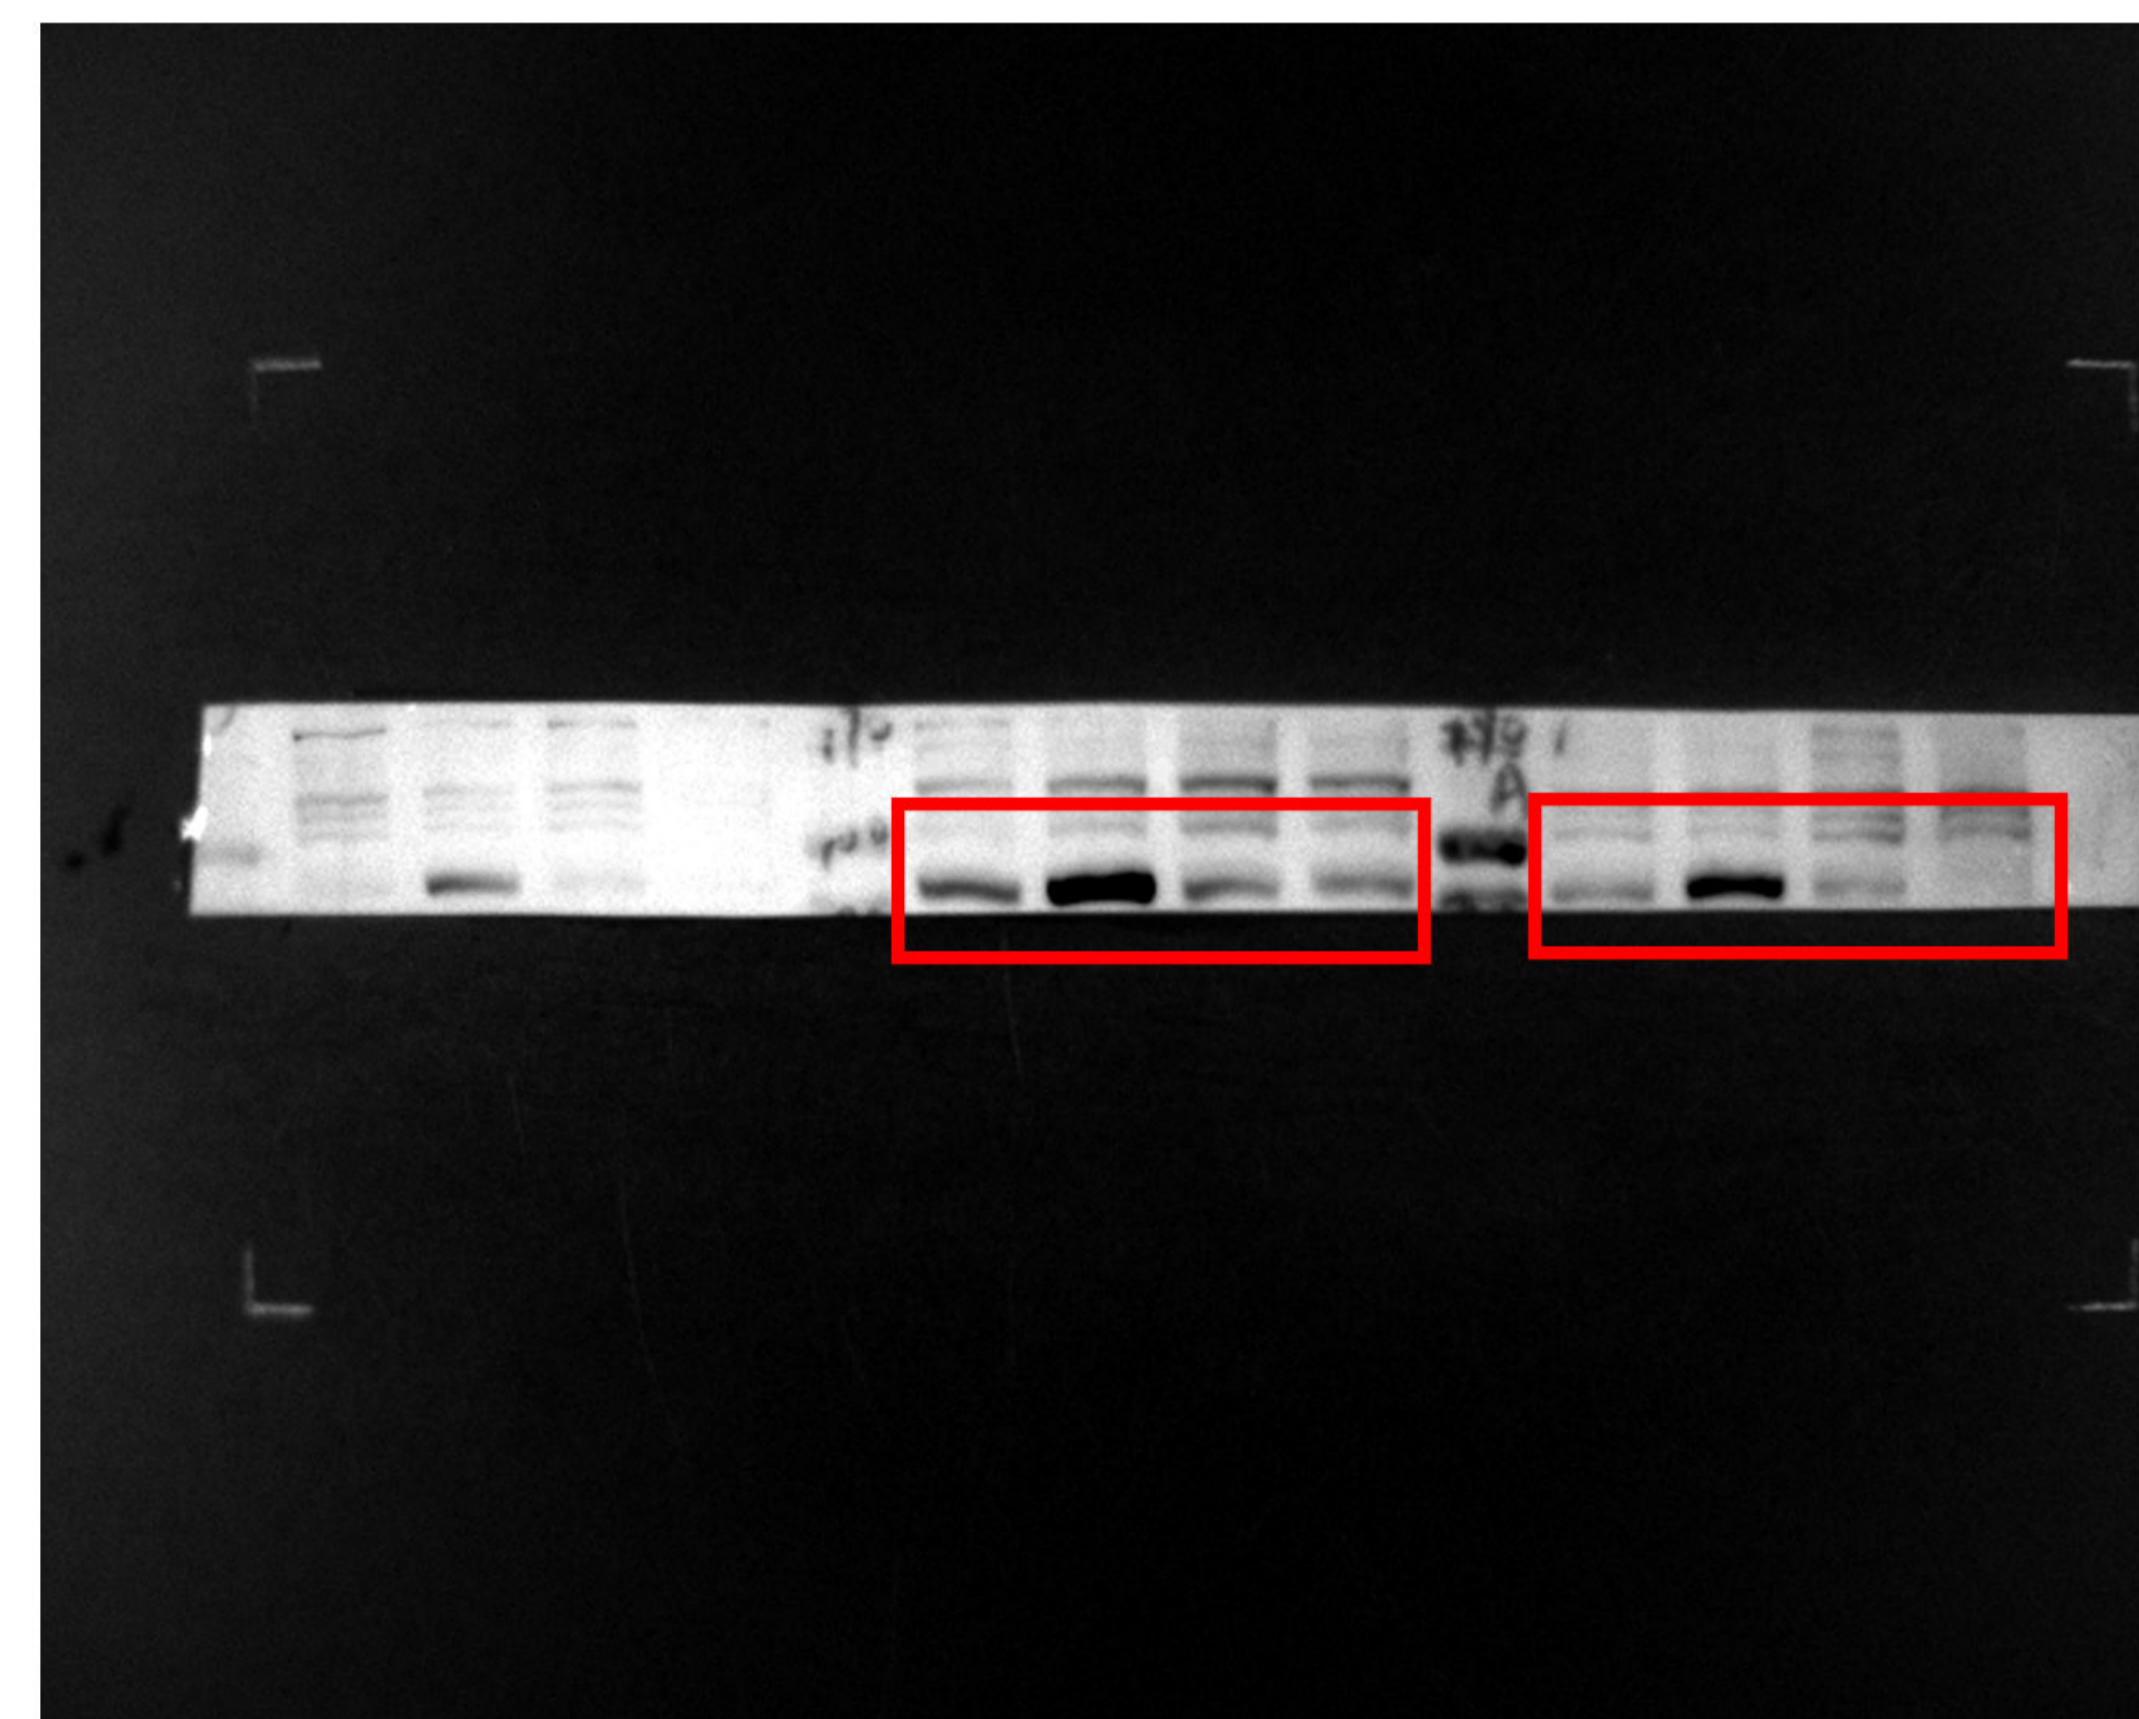

**LSS**

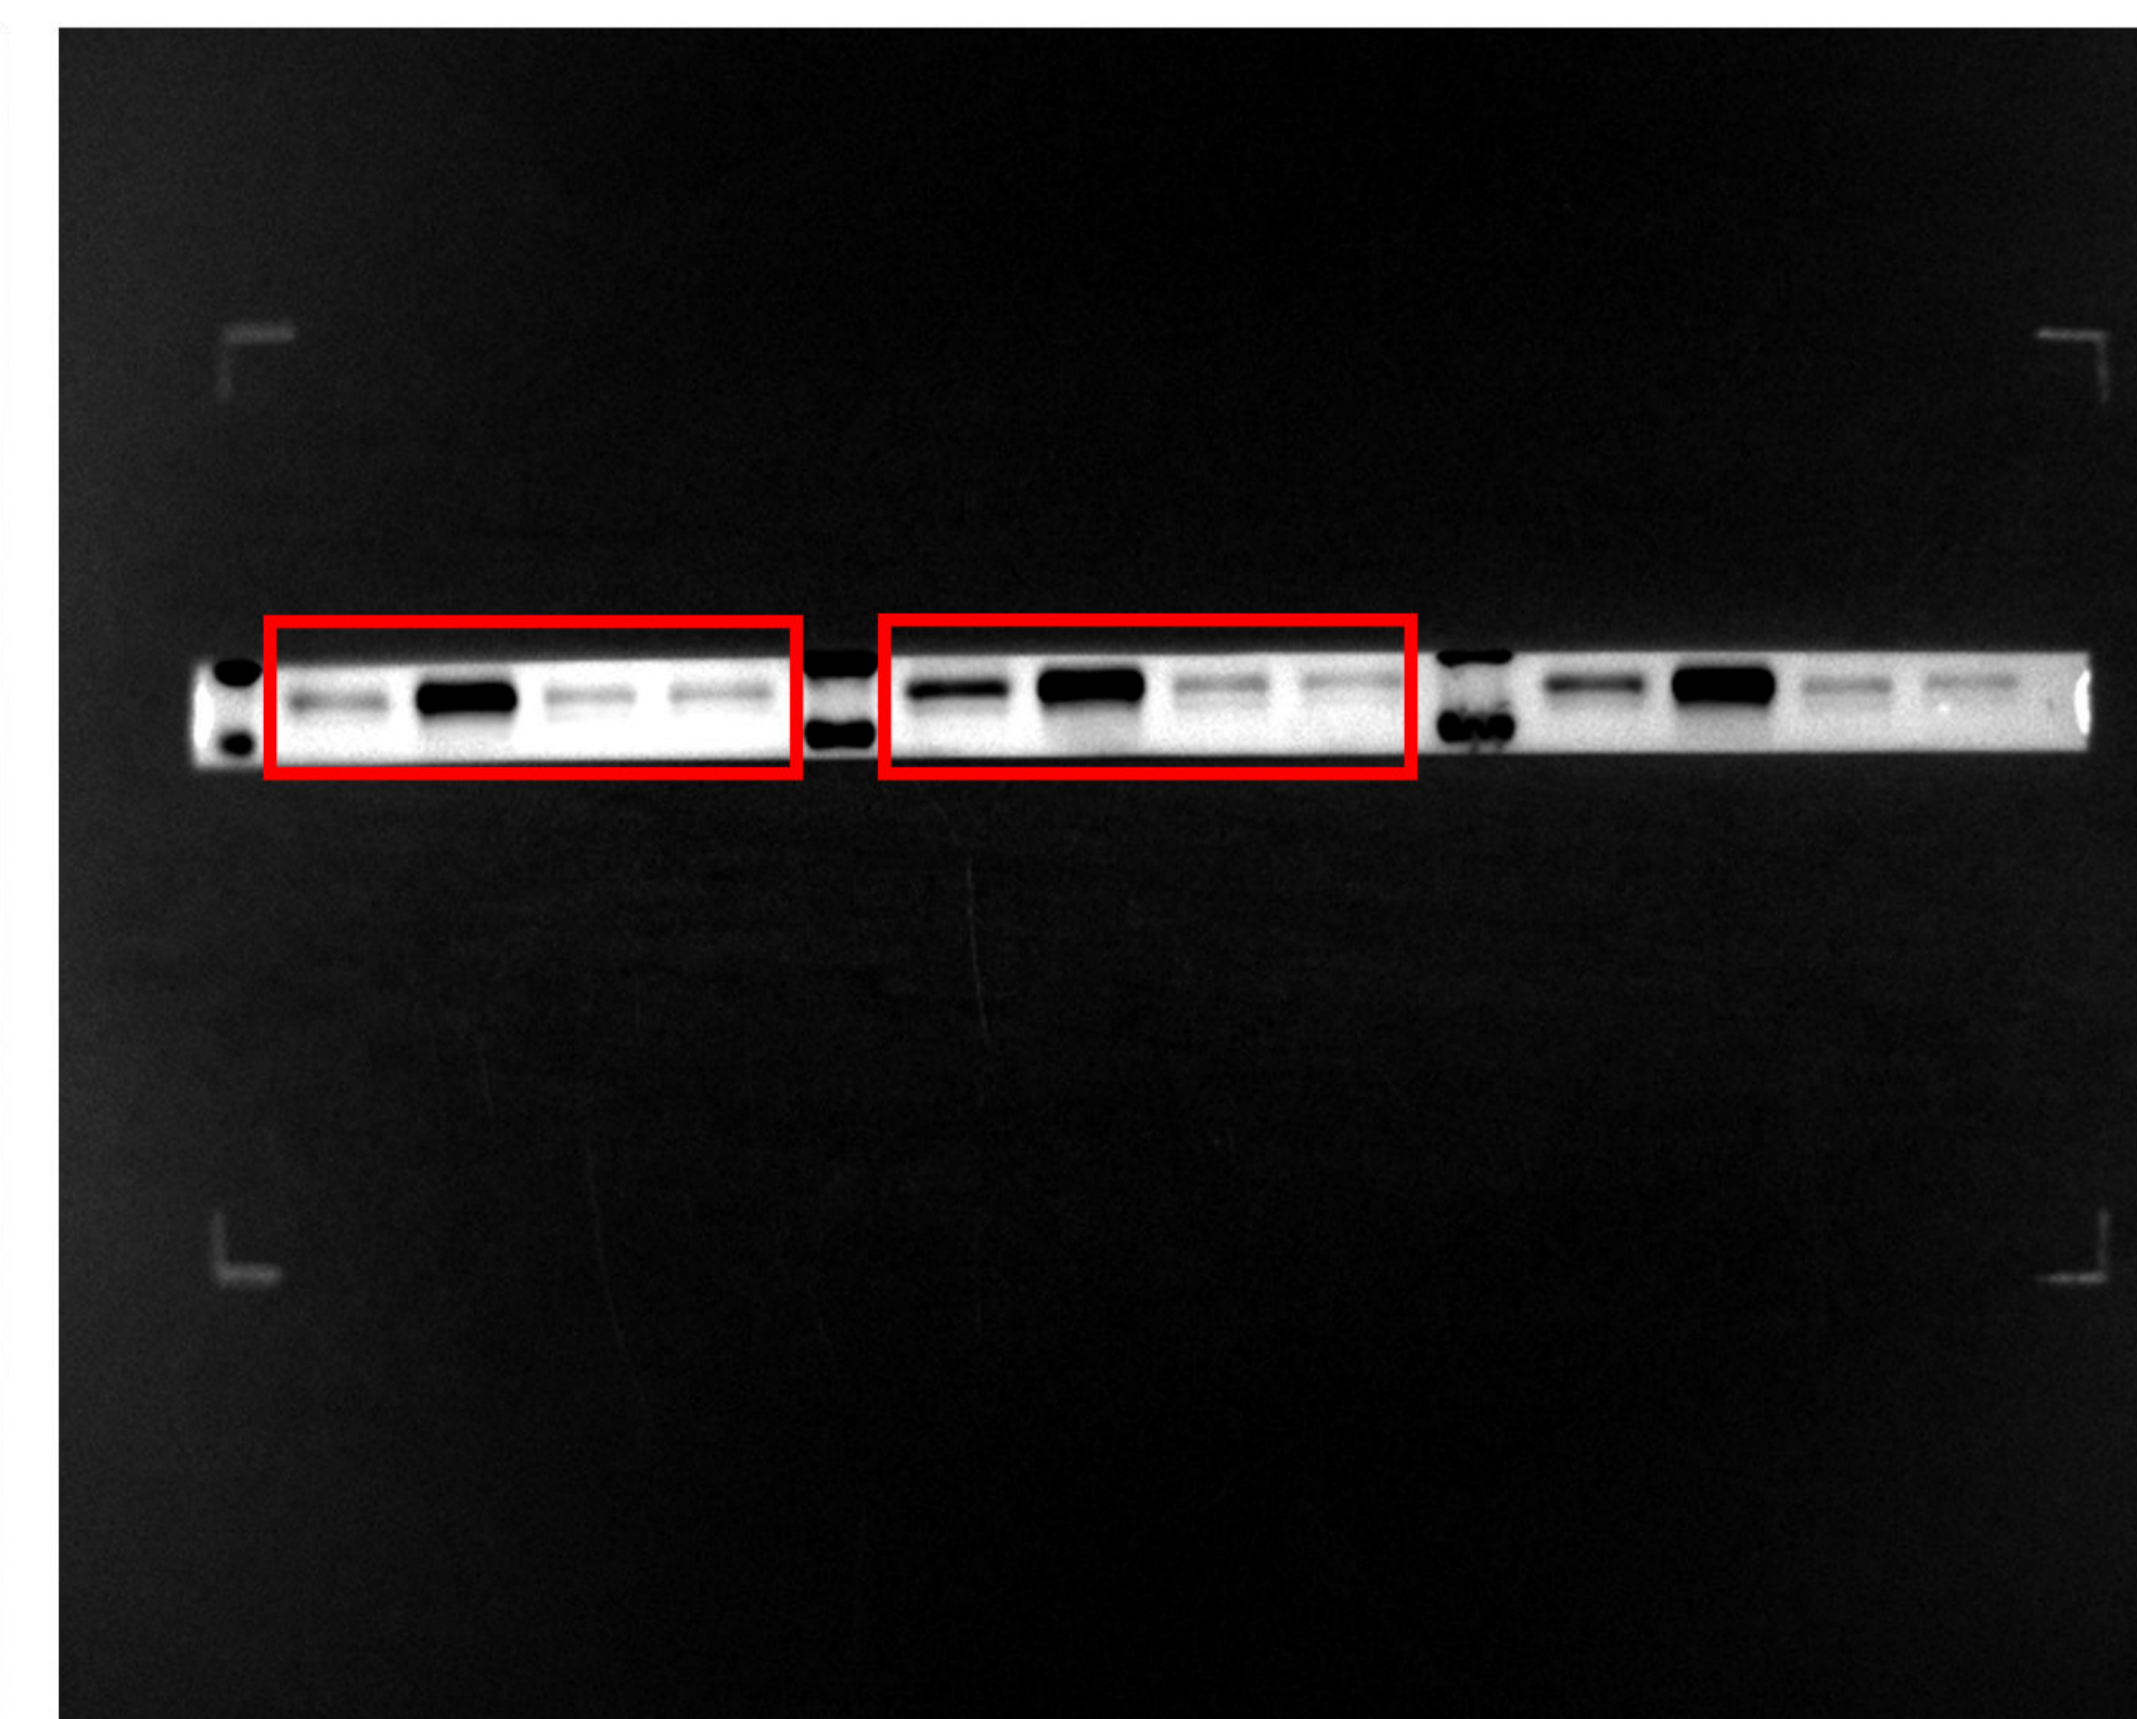

**SQLE**

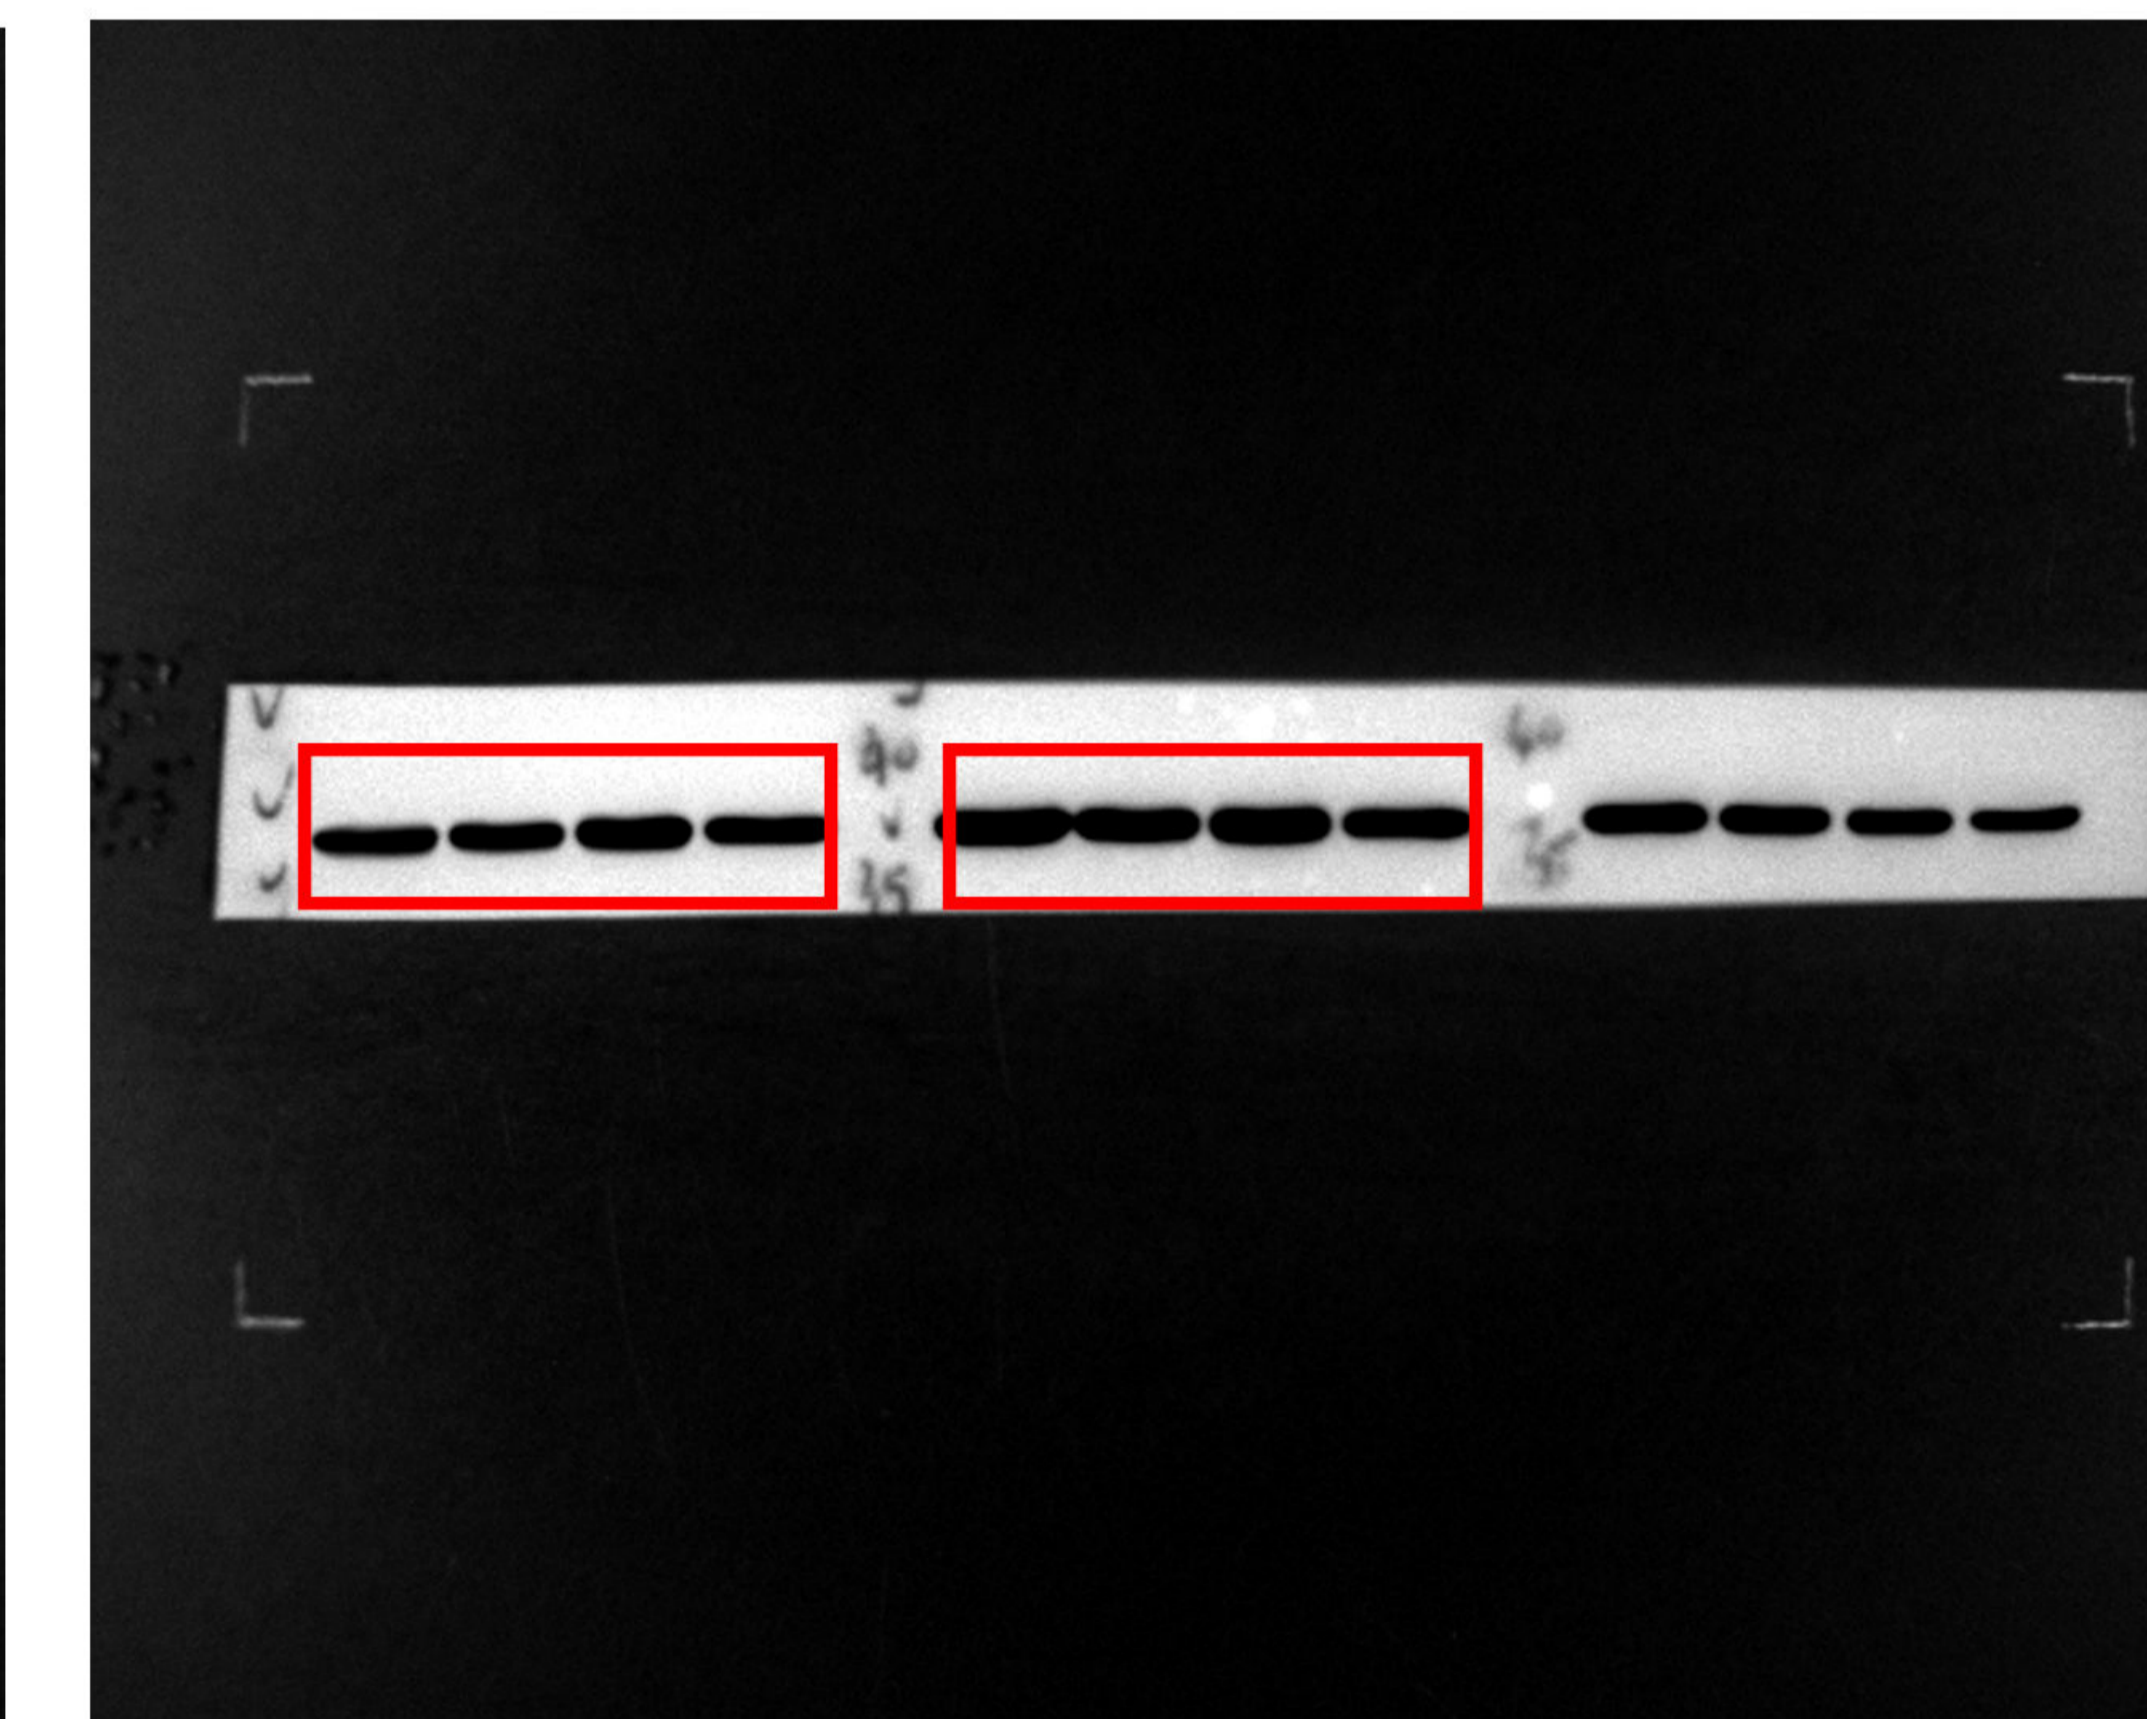

**GAPDH**



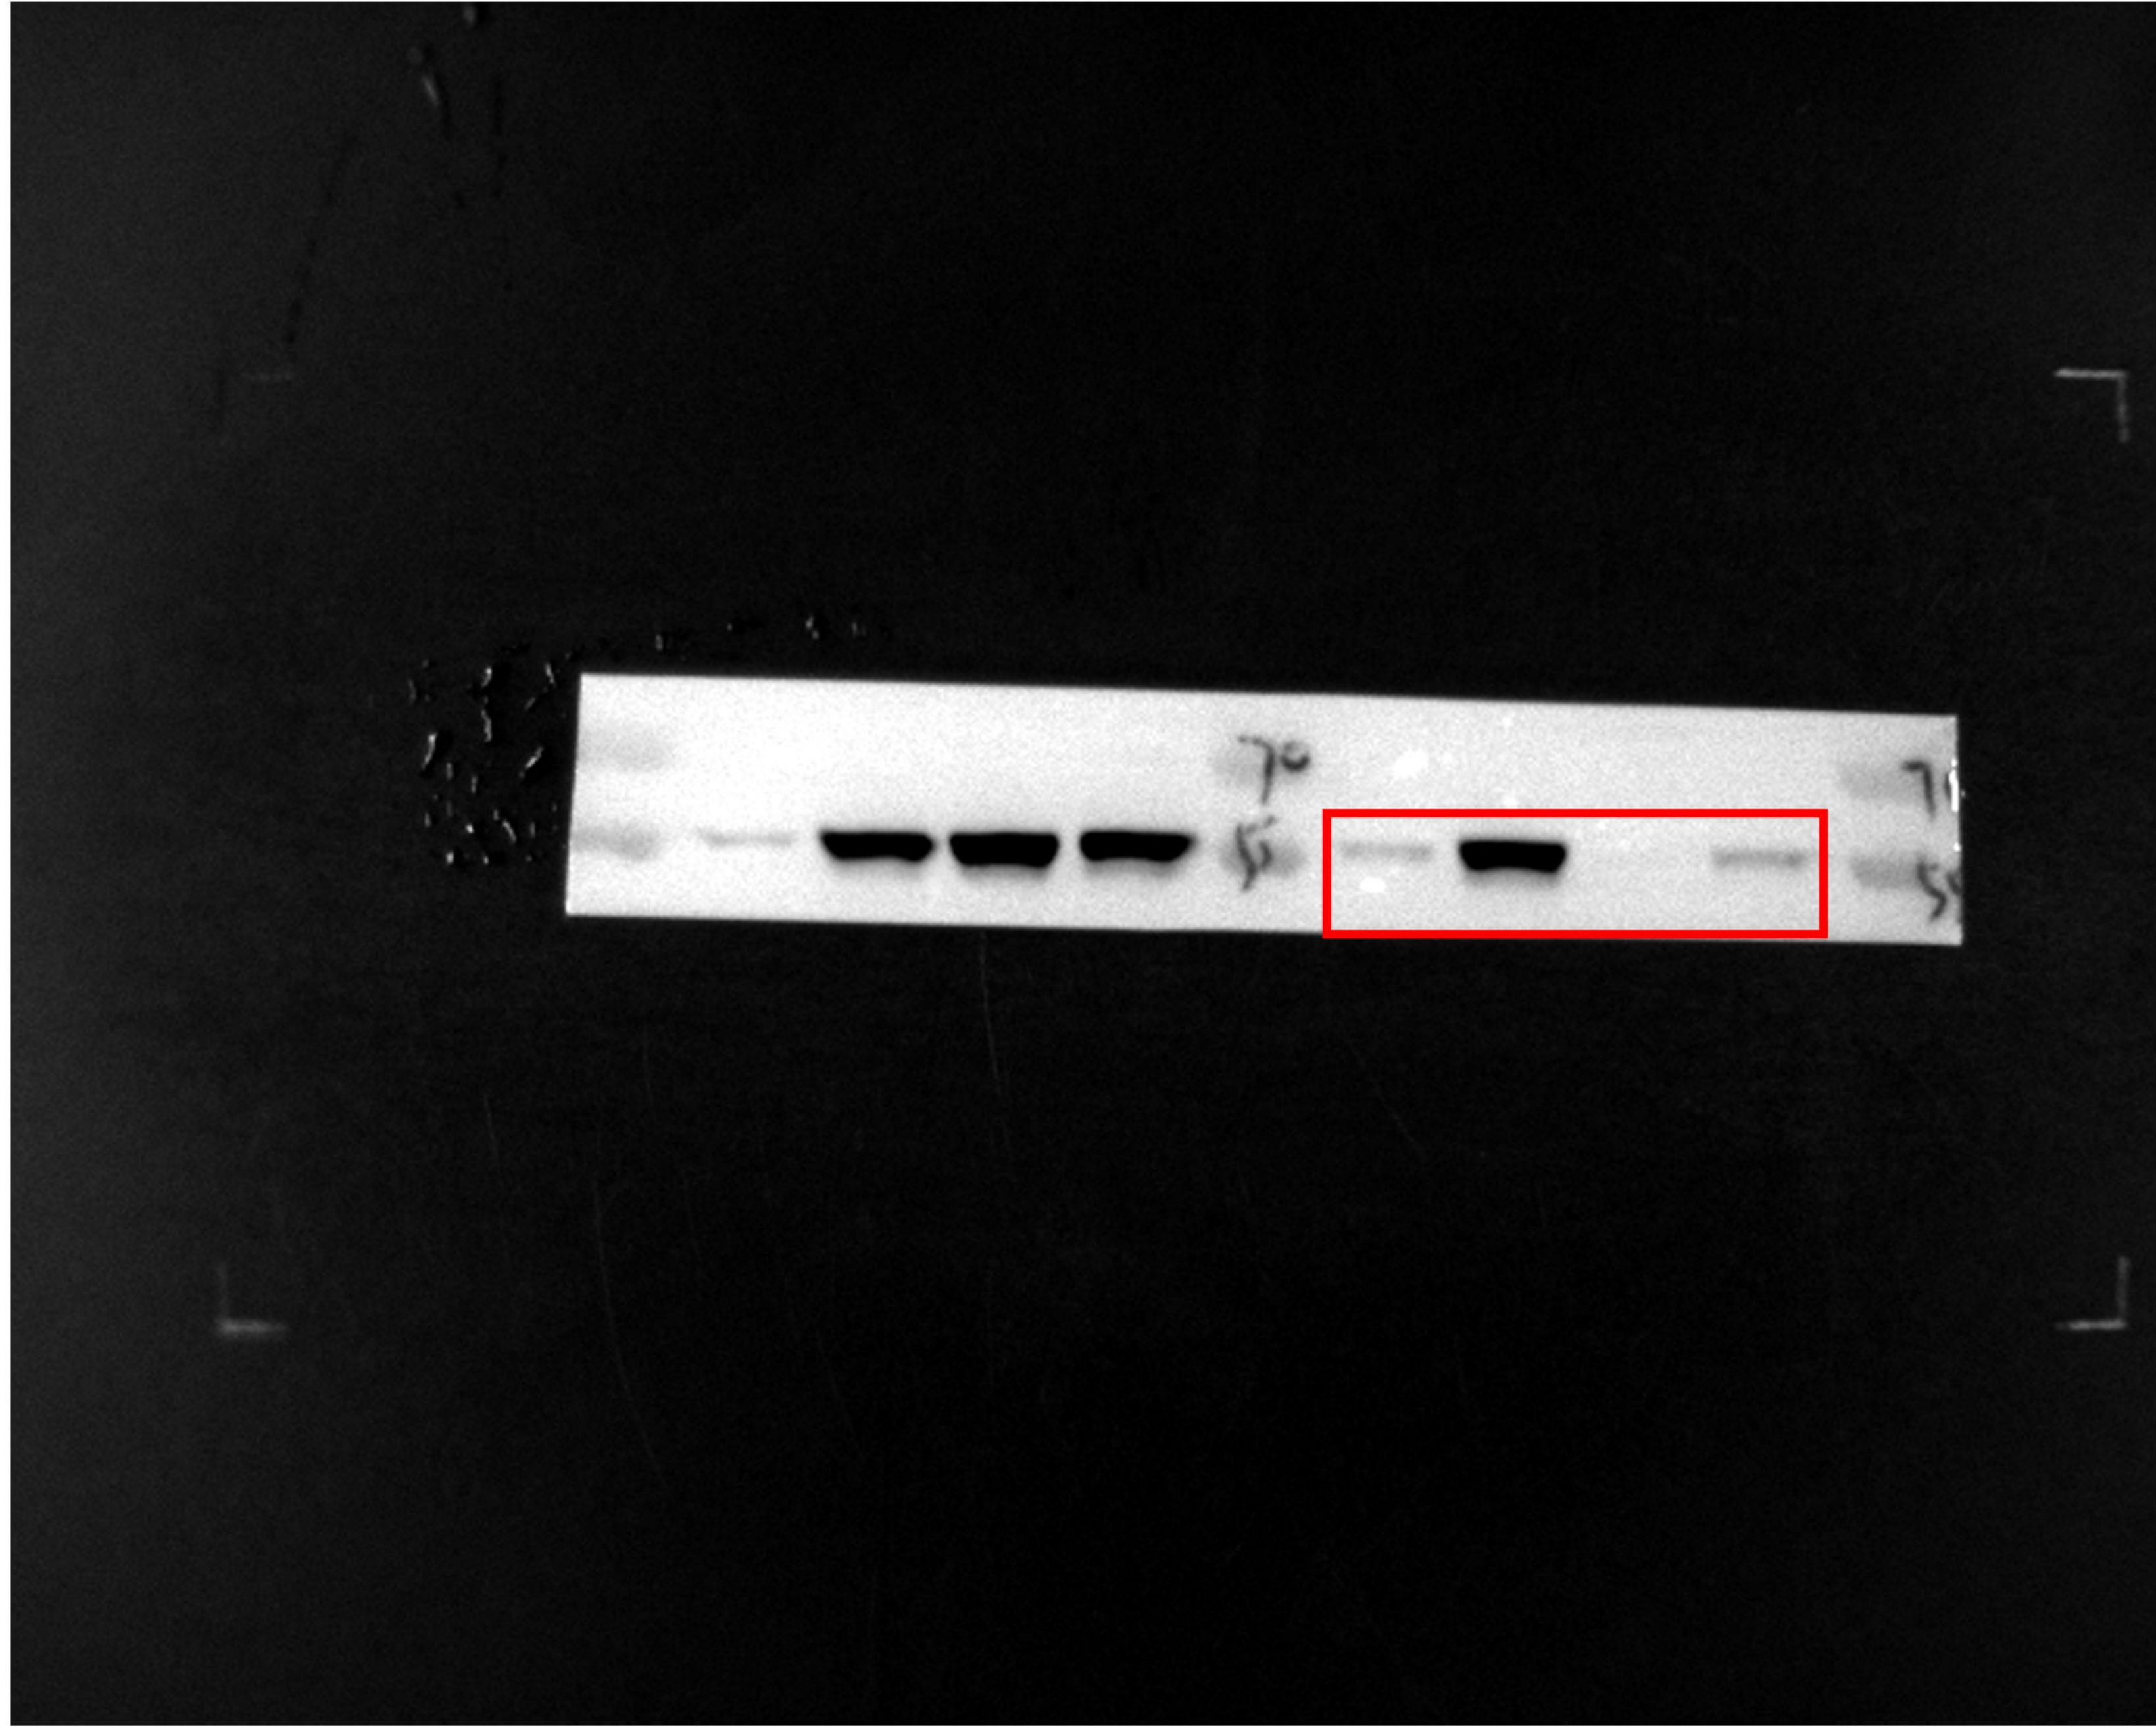

**HMGCS1**

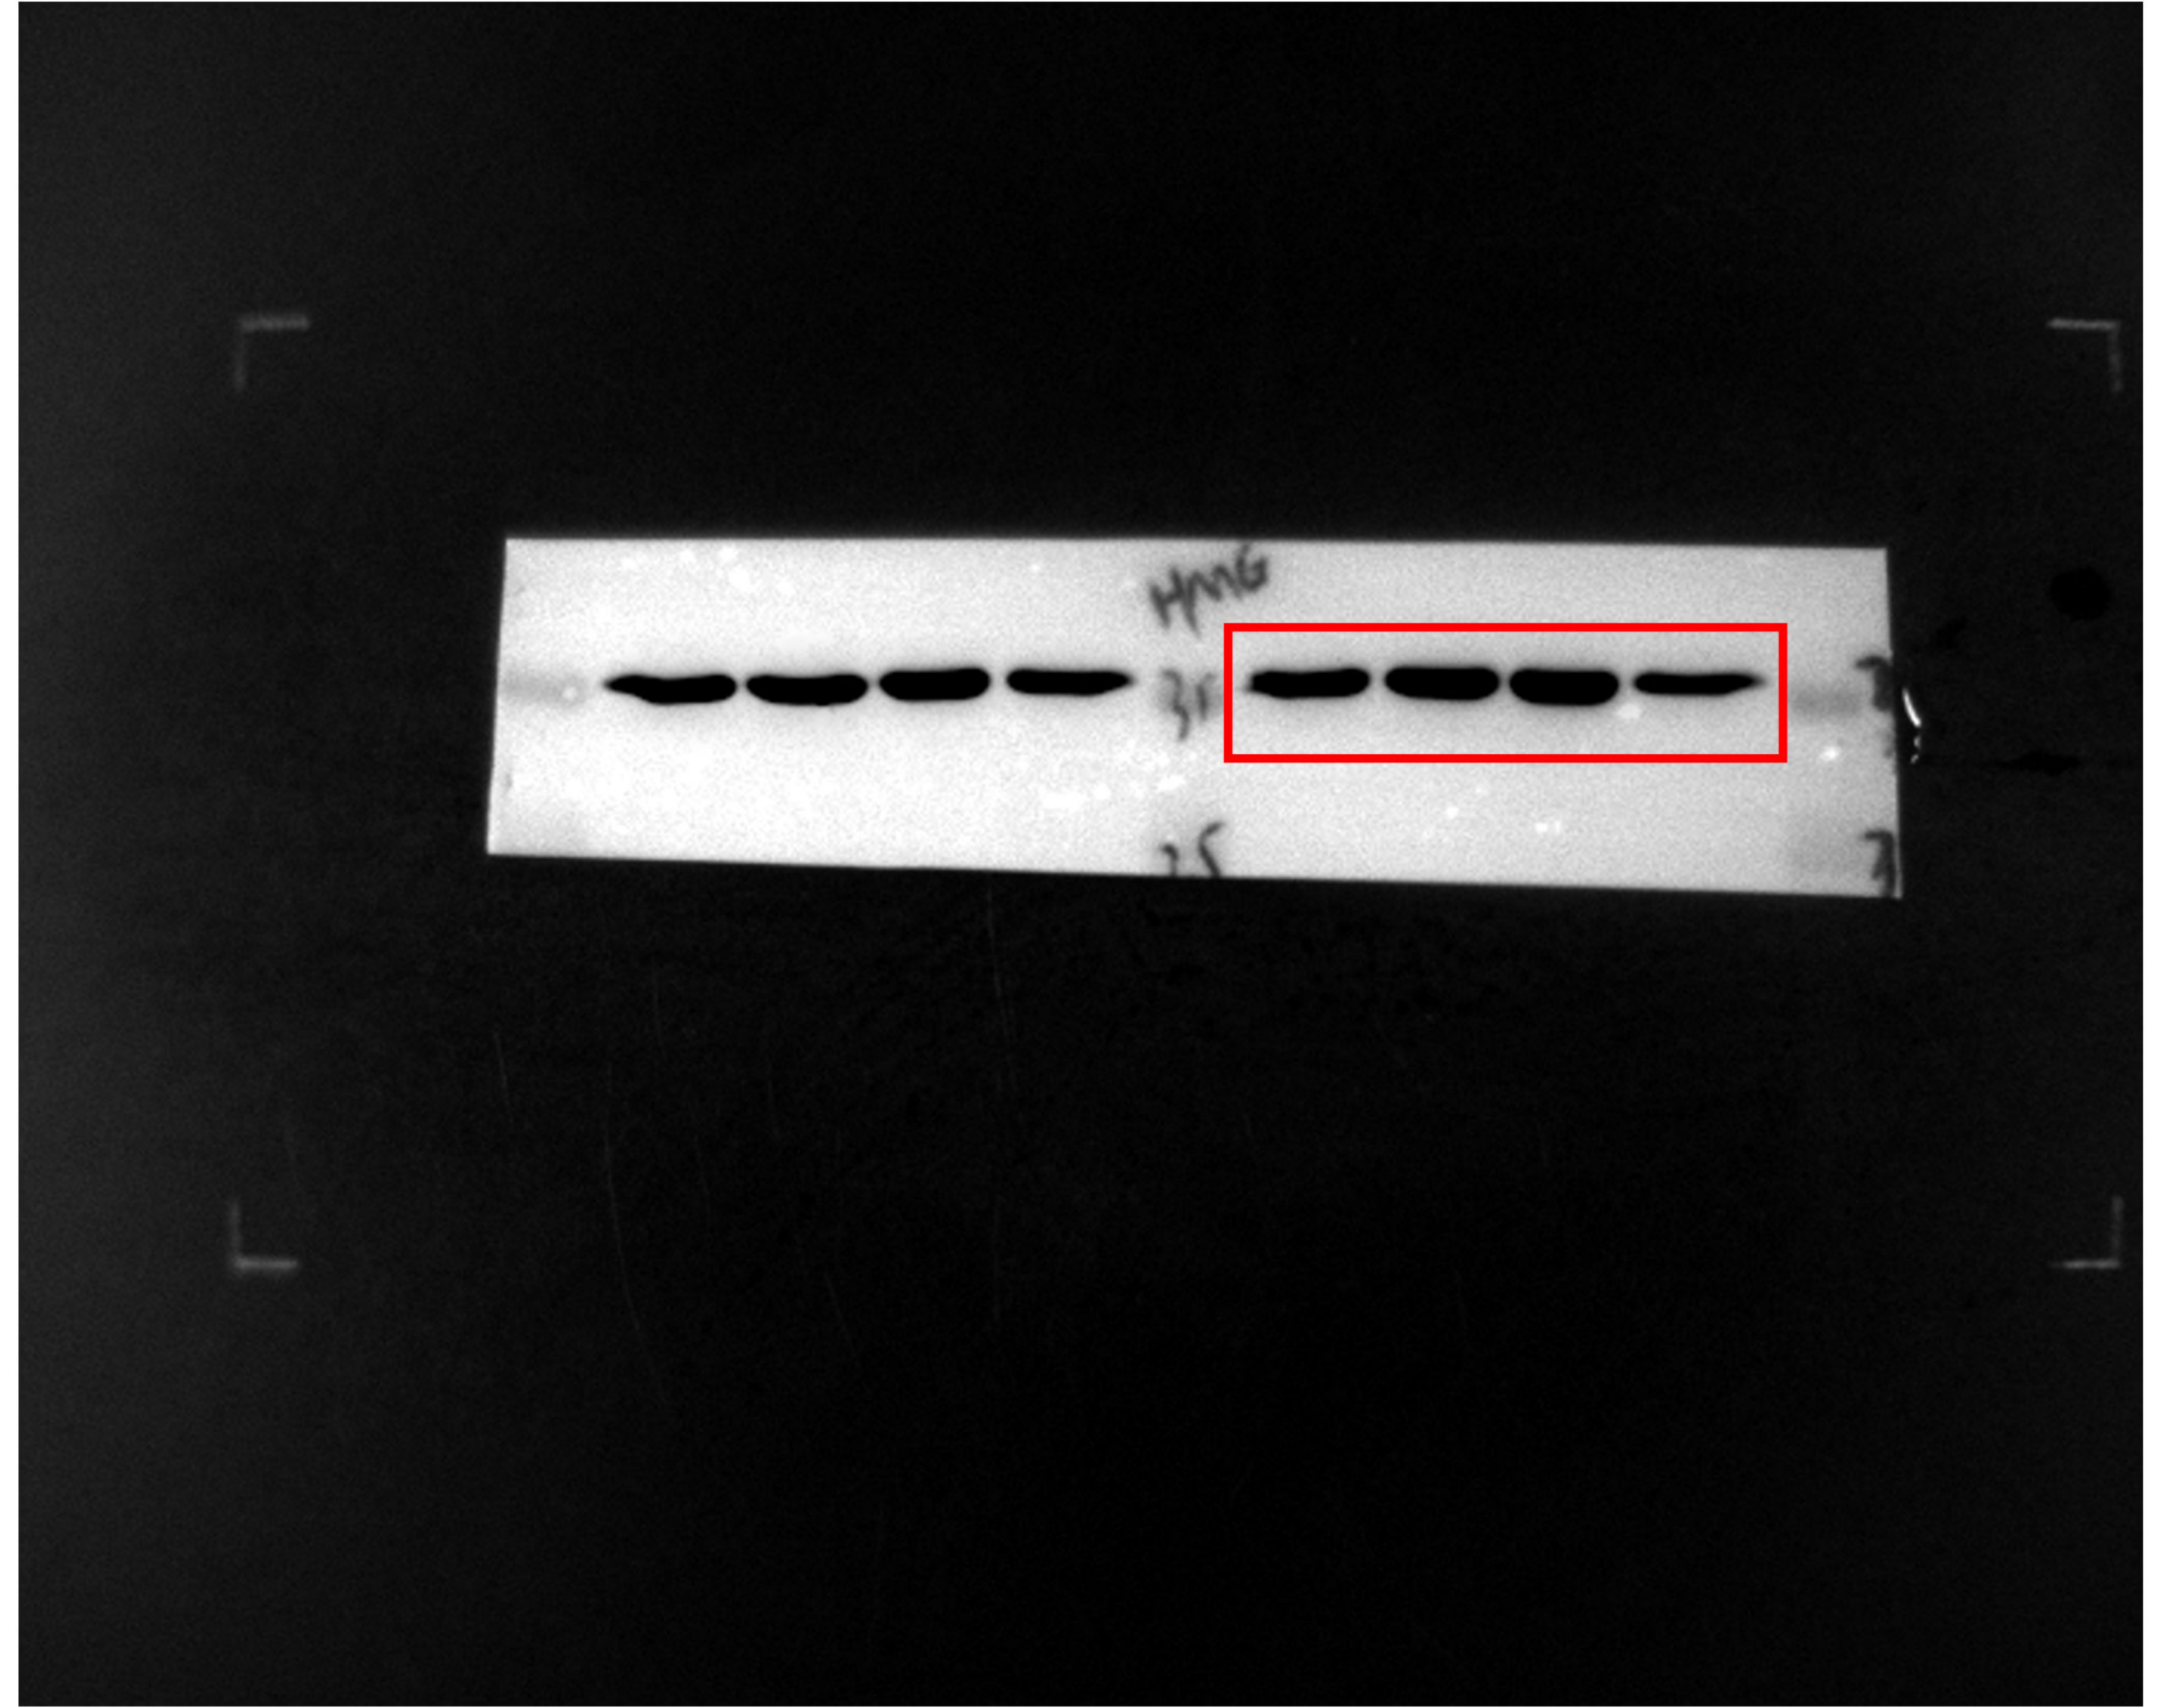

**GAPDH**
